# Supplementary material for: Identifying Synergistic Mechanisms of Multiple Ingredients in Shuangbai Tablets against Proteinuria by Virtual Screening and a Network Pharmacology Approach
Source: Evid Based Complement Alternat Med. 2020 Jan 6;2020:1027271. doi: 10.1155/2020/1027271 (PMC6984745; doi:10.1155/2020/1027271)
Supplement: Supplementary Materials — Supplementary Table 1: 118 active ingredients in Shuangbai Tablets. Supplementary Table 2: 8981 targets of the active ingredients in Shuangbai Tablets. Supplementary Table 3: 110 523 genes associated with proteinuria. Supplementary Table 4: candidate targets with therapeutic proteinuria. Supplementary Table 5: 172 pairs of protein interactions of candidate targets. Supplementary Table 6: specific analytical parameters of 41 central targets. [file 1027271.f1.zip]

Archive with 6 entries (6 files):
- 1027271.f1/Table 1-ingredients.xlsx
- 1027271.f1/Table 2-The targets of the active ingredients.xlsx
- 1027271.f1/Table 3-Proteinuria-related Genes.xlsx
- 1027271.f1/Table 4-Candidate target.xlsx
- 1027271.f1/Table 5-Candidate target-related genes.xlsx
- 1027271.f1/Table 6-specific analytical parameters of central targets.xlsx
