# Supplementary material for: Identifying Synergistic Mechanisms of Multiple Ingredients in Shuangbai Tablets against Proteinuria by Virtual Screening and a Network Pharmacology Approach
Source: Evid Based Complement Alternat Med. 2020 Jan 6;2020:1027271. doi: 10.1155/2020/1027271 (PMC6984745; doi:10.1155/2020/1027271)
Supplement: Supplementary Materials — Supplementary Table 1: 118 active ingredients in Shuangbai Tablets. Supplementary Table 2: 8981 targets of the active ingredients in Shuangbai Tablets. Supplementary Table 3: 110 523 genes associated with proteinuria. Supplementary Table 4: candidate targets with therapeutic proteinuria. Supplementary Table 5: 172 pairs of protein interactions of candidate targets. Supplementary Table 6: specific analytical parameters of 41 central targets. [file 1027271.f1.zip › 1027271.f1/Table 1-ingredients.xlsx]

## Sheet: Sheet1
TCM	Mol ID	Compound	Canonical SMILES	OB(%)	DL
IRH	MOL001870	LUTEOLINIDIN	C1=CC(=C(C=C1C2=[O+]C3=CC(=CC(=C3C=C2)O)O)O)O	53.66	0.22
IRH	MOL000358	beta-sitosterol	CCC(CCC(C)C1CCC2C1(CCC3C2CC=C4C3(CCC(C4)O)C)C)C(C)C	36.91	0.75
IRH	MOL000387	Bifendate	COC1=C2C(=C(C(=C1)C(=O)OC)C3=C4C(=C(C=C3C(=O)OC)OC)OCO4)OCO2	31.1	0.67
IRH	MOL000449	Stigmasterol	CCC(C=CC(C)C1CCC2C1(CCC3C2CC=C4C3(CCC(C4)O)C)C)C(C)C	43.83	0.76
IRH	MOL001876	6-Methoxyflavone	COC1=CC2=C(C=C1)OC(=CC2=O)C3=CC=CC=C3	34.56	0.18
HMM	MOL000211	Mairin	CC(=C)C1CCC2(C1C3CCC4C5(CCC(C(C5CCC4(C3(CC2)C)C)(C)C)O)C)C(=O)O	55.38	0.78
HMM	MOL000239	Jaranol	COC1=CC(=C2C(=C1)OC(=C(C2=O)OC)C3=CC=C(C=C3)O)O	50.83	0.29
HMM	MOL000296	hederagenin	CC1(CCC2(CCC3(C(=CCC4C3(CCC5C4(CCC(C5(C)CO)O)C)C)C2C1)C)C(=O)O)C	36.91	0.75
HMM	MOL000033	(3S,8S,9S,10R,13R,14S,17R)-10,13-dimethyl-17-[(2R,5S)-5-propan-2-yloctan-2-yl]-2,3,4,7,8,9,11,12,14,15,16,17-dodecahydro-1H-cyclopenta[a]phenanthren-3-ol	CCCC(CCC(C)C1CCC2C1(CCC3C2CC=C4C3(CCC(C4)O)C)C)C(C)C	36.23	0.78
HMM	MOL000354	isorhamnetin	COC1=C(C=CC(=C1)C2=C(C(=O)C3=C(C=C(C=C3O2)O)O)O)O	49.6	0.31
HMM	MOL000371	3,9-di-O-methylnissolin	COC1=CC2=C(C=C1)C3C(CO2)C4=C(O3)C(=C(C=C4)OC)OC	53.74	0.48
HMM	MOL000378	7-O-methylisomucronulatol	COC1=CC2=C(CC(CO2)C3=C(C(=C(C=C3)OC)OC)O)C=C1	74.69	0.3
HMM	MOL000380	(6aR,11aR)-9,10-dimethoxy-6a,11a-dihydro-6H-benzofurano[3,2-c]chromen-3-ol	COC1=C(C2=C(C=C1)C3COC4=C(C3O2)C=CC(=C4)O)OC	64.26	0.42
HMM	MOL000387	Bifendate	COC1=C2C(=C(C(=C1)C(=O)OC)C3=C4C(=C(C=C3C(=O)OC)OC)OCO4)OCO2	31.1	0.67
HMM	MOL000392	formononetin	COC1=CC=C(C=C1)C2=COC3=C(C2=O)C=CC(=C3)O	69.67	0.21
HMM	MOL000398	isoflavanone	C1C(C(=O)C2=CC=CC=C2O1)C3=CC=CC=C3	109.99	0.3
HMM	MOL000417	Calycosin	COC1=C(C=C(C=C1)C2=COC3=C(C2=O)C=CC(=C3)O)O	47.75	0.24
HMM	MOL000422	kaempferol	C1=CC(=CC=C1C2=C(C(=O)C3=C(C=C(C=C3O2)O)O)O)O	41.88	0.24
HMM	MOL000433	FA	C1=CC(=CC=C1C(=O)NC(CCC(=O)O)C(=O)O)NCC2=CN=C3C(=N2)C(=O)N=C(N3)N	68.96	0.71
HMM	MOL000438	(3R)-3-(2-hydroxy-3,4-dimethoxyphenyl)chroman-7-ol	COC1=C(C(=C(C=C1)C2CC3=C(C=C(C=C3)O)OC2)O)OC	67.67	0.26
HMM	MOL000439	isomucronulatol-7,2'-di-O-glucosiole	COC1=C(C(=C(C=C1)C2CC3=C(C=C(C=C3)OC4C(C(C(C(O4)CO)O)O)O)OC2)OC5C(C(C(C(O5)CO)O)O)O)OC	49.28	0.62
HMM	MOL000442	1,7-Dihydroxy-3,9-dimethoxy pterocarpene	COC1=CC(=C2C(=C1)OCC3=C2OC4=CC(=CC(=C34)O)OC)O	39.05	0.48
HMM	MOL000098	quercetin	C1=CC(=C(C=C1C2=C(C(=O)C3=C(C=C(C=C3O2)O)O)O)O)O	46.43	0.28
ABR	MOL001006	poriferasta-7,22E-dien-3beta-ol	CCC(C=CC(C)C1CCC2C1(CCC3C2=CCC4C3(CCC(C4)O)C)C)C(C)C	42.98	0.76
ABR	MOL012461	28-norolean-17-en-3-ol	CC1(CCC2=C(C1)C3CCC4C5(CCC(=O)C(C5CCC4(C3(CC2)C)C)(C)C)C)C	35.93	0.78
ABR	MOL012505	bidentatoside	CC1(CCC2(CCC3(C(=CCC4C3(CCC5C4(CCC(C5(C)C)OC6C7C(C(C(O6)C(=O)O)O)OC(C(O7)OCC(=O)O)(C(=O)O)O)C)C)C2C1)C)C(=O)OC8C(C(C(C(O8)CO)O)O)O)C	31.76	0.59
ABR	MOL012537	Spinoside A	CC(=O)OC1COC(C(C1O)OC(=O)C)OC2CC3(C4CC=C5C(C4(CCC3(C2C(C)(C(=O)C=CC(C)(C)O)O)C)C)C=C(C(=O)C5(C)C)O)C	41.75	0.4
ABR	MOL012542	β-ecdysterone	CC12CCC3C(=CC(=O)C4C3(CC(C(C4)O)O)C)C1(CCC2C(C)(C(CCC(C)(C)O)O)O)O	44.23	0.82
ABR	MOL001454	berberine	COC1=C(C2=C[N+]3=C(C=C2C=C1)C4=CC5=C(C=C4CC3)OCO5)OC	36.86	0.78
ABR	MOL001458	coptisine	C1C[N+]2=C(C=C3C=CC4=C(C3=C2)OCO4)C5=CC6=C(C=C51)OCO6	30.67	0.86
ABR	MOL000173	wogonin	COC1=C(C=C(C2=C1OC(=CC2=O)C3=CC=CC=C3)O)O	30.68	0.23
ABR	MOL002643	delta 7-stigmastenol	CCC(CCC(C)C1CCC2C1(CCC3C2=CCC4C3(CCC(C4)O)C)C)C(C)C	37.42	0.75
ABR	MOL002714	baicalein	C1=CC=C(C=C1)C2=CC(=O)C3=C(C(=C(C=C3O2)O)O)O	33.52	0.21
ABR	MOL002776	Baicalin	C1=CC=C(C=C1)C2=CC(=O)C3=C(C(=C(C=C3O2)OC4C(C(C(C(O4)C(=O)O)O)O)O)O)O	40.12	0.75
ABR	MOL002897	epiberberine	COC1=C(C=C2C(=C1)CC[N+]3=C2C=C4C=CC5=C(C4=C3)OCO5)OC	43.09	0.78
ABR	MOL000358	beta-sitosterol	CCC(CCC(C)C1CCC2C1(CCC3C2CC=C4C3(CCC(C4)O)C)C)C(C)C	36.91	0.75
ABR	MOL003847	Inophyllum E	CC1C(OC2=C(C1=O)C3=C(C(=CC(=O)O3)C4=CC=CC=C4)C5=C2C=CC(O5)(C)C)C	38.81	0.85
ABR	MOL000422	kaempferol	C1=CC(=CC=C1C2=C(C(=O)C3=C(C=C(C=C3O2)O)O)O)O	41.88	0.24
ABR	MOL004355	Spinasterol	CCC(C=CC(C)C1CCC2C1(CCC3C2=CCC4C3(CCC(C4)O)C)C)C(C)C	42.98	0.76
ABR	MOL000449	Stigmasterol	CCC(C=CC(C)C1CCC2C1(CCC3C2CC=C4C3(CCC(C4)O)C)C)C(C)C	43.83	0.76
ABR	MOL000785	palmatine	COC1=C(C2=C[N+]3=C(C=C2C=C1)C4=CC(=C(C=C4CC3)OC)OC)OC	64.6	0.65
ABR	MOL000085	beta-daucosterol	CCC(CCC(C)C1CCC2C1(CCC3C2CC=C4C3(CCC(C4)OC5C(C(C(C(O5)CO)O)O)O)C)C)C(C)C	36.91	0.75
RPR	MOL001002	ellagic acid	C1=C2C3=C(C(=C1O)O)OC(=O)C4=CC(=C(C(=C43)OC2=O)O)O	43.06	0.43
RPR	MOL001918	paeoniflorgenone	CC12CC(=O)C3CC1(OC(C3COC(=O)C4=CC=CC=C4)O2)O	87.59	0.37
RPR	MOL001921	Lactiflorin		49.12	0.8
RPR	MOL001924	paeoniflorin	CC12CC3(C4CC1(C4(C(O2)O3)COC(=O)C5=CC=CC=C5)OC6C(C(C(C(O6)CO)O)O)O)O	53.87	0.79
RPR	MOL002714	baicalein	C1=CC=C(C=C1)C2=CC(=O)C3=C(C(=C(C=C3O2)O)O)O	33.52	0.21
RPR	MOL002776	Baicalin	C1=CC=C(C=C1)C2=CC(=O)C3=C(C(=C(C=C3O2)OC4C(C(C(C(O4)C(=O)O)O)O)O)O)O	40.12	0.75
RPR	MOL000358	beta-sitosterol	CCC(CCC(C)C1CCC2C1(CCC3C2CC=C4C3(CCC(C4)O)C)C)C(C)C	36.91	0.75
RPR	MOL000359	sitosterol	CCC(CCC(C)C1CCC2C1(CCC3C2CC=C4C3(CCC(C4)O)C)C)C(C)C	36.91	0.75
RPR	MOL004355	Spinasterol	CCC(C=CC(C)C1CCC2C1(CCC3C2=CCC4C3(CCC(C4)O)C)C)C(C)C	42.98	0.76
RPR	MOL000449	Stigmasterol	CCC(C=CC(C)C1CCC2C1(CCC3C2CC=C4C3(CCC(C4)O)C)C)C(C)C	43.83	0.76
PRA	MOL001910	11alpha,12alpha-epoxy-3beta-23-dihydroxy-30-norolean-20-en-28,12beta-olide	CC12CCC(C(C1CCC3(C2C4C(O4)C56C3(CCC7(C5CC(=C)CC7)C(=O)O6)C)C)(C)CO)O	64.77	0.38
PRA	MOL001918	paeoniflorgenone	CC12CC(=O)C3CC1(OC(C3COC(=O)C4=CC=CC=C4)O2)O	87.59	0.37
PRA	MOL001919	(3S,5R,8R,9R,10S,14S)-3,17-dihydroxy-4,4,8,10,14-pentamethyl-2,3,5,6,7,9-hexahydro-1H-cyclopenta[a]phenanthrene-15,16-dione	CC1(C2CCC3(C(C2(CCC1O)C)C=CC4=C(C(=O)C(=O)C43C)O)C)C	43.56	0.53
PRA	MOL001921	Lactiflorin	CC12C3(CC4C3(C(O1)CC4=O)COC(=O)C5=CC=CC=C5)OC6C(O2)C(C(C(O6)CO)O)O	49.12	0.8
PRA	MOL001924	paeoniflorin	CC12CC3(C4CC1(C4(C(O2)O3)COC(=O)C5=CC=CC=C5)OC6C(C(C(C(O6)CO)O)O)O)O	53.87	0.79
PRA	MOL001928	albiflorin	CC12CC(C3CC1(C3(C(=O)O2)COC(=O)C4=CC=CC=C4)OC5C(C(C(C(O5)CO)O)O)O)O	66.64	0.33
PRA	MOL001930	benzoyl paeoniflorin	CC12CC3(C4CC1(C4(C(O2)O3)COC(=O)C5=CC=CC=C5)OC6C(C(C(C(O6)COC(=O)C7=CC=CC=C7)O)O)O)O	31.27	0.75
PRA	MOL000211	Mairin	CC(=C)C1CCC2(C1C3CCC4C5(CCC(C(C5CCC4(C3(CC2)C)C)(C)C)O)C)C(=O)O	55.38	0.78
PRA	MOL000358	beta-sitosterol	CCC(CCC(C)C1CCC2C1(CCC3C2CC=C4C3(CCC(C4)O)C)C)C(C)C	36.91	0.75
PRA	MOL000359	sitosterol	CCC(CCC(C)C1CCC2C1(CCC3C2CC=C4C3(CCC(C4)O)C)C)C(C)C	36.91	0.75
PRA	MOL000422	kaempferol	C1=CC(=CC=C1C2=C(C(=O)C3=C(C=C(C=C3O2)O)O)O)O	41.88	0.24
PRA	MOL000492	(+)-catechin	C1C(C(OC2=CC(=CC(=C21)O)O)C3=CC(=C(C=C3)O)O)O	54.83	0.24
FRU	MOL000358	beta-sitosterol	CCC(CCC(C)C1CCC2C1(CCC3C2CC=C4C3(CCC(C4)O)C)C)C(C)C	36.91	0.75
FRU	MOL000359	sitosterol	CCC(CCC(C)C1CCC2C1(CCC3C2CC=C4C3(CCC(C4)O)C)C)C(C)C	36.91	0.75
FRU	MOL000519	coniferin	CC(CO)C1=C(C2=C(C3=C(C=C2)C(CCC3)(C)C)C(=O)C1=O)O	31.11	0.32
LHE	MOL000296	hederagenin	CC1(CCC2(CCC3(C(=CCC4C3(CCC5C4(CCC(C5(C)CO)O)C)C)C2C1)C)C(=O)O)C	36.91	0.75
LHE	MOL000358	beta-sitosterol	CCC(CCC(C)C1CCC2C1(CCC3C2CC=C4C3(CCC(C4)O)C)C)C(C)C	36.91	0.75
TME	MOL000359	sitosterol	CCC(CCC(C)C1CCC2C1(CCC3C2CC=C4C3(CCC(C4)O)C)C)C(C)C	36.91	0.75
TME	MOL008006	paryriogenin A	CC1(CC2=C3C=CC4C5(CCC(=O)C(C5CCC4(C3(CCC2(CC1=O)C(=O)O)C)C)(C)C)C)C	41.41	0.76
STR	MOL002333	Tetraneurin A	CC(=O)OCC1CCC2C(C3(C1(CCC3=O)O)C)OC(=O)C2=C	35.4	0.31
STR	MOL002341	Hesperetin	COC1=C(C=C(C=C1)C2CC(=O)C3=C(C=C(C=C3O2)O)O)O	70.31	0.27
STR	MOL000358	beta-sitosterol	CCC(CCC(C)C1CCC2C1(CCC3C2CC=C4C3(CCC(C4)O)C)C)C(C)C	36.91	0.75
DRA	MOL003152	Gentisin	COC1=CC(=C2C(=C1)OC3=C(C2=O)C=C(C=C3)O)O	64.06	0.21
DRA	MOL000358	beta-sitosterol	CCC(CCC(C)C1CCC2C1(CCC3C2CC=C4C3(CCC(C4)O)C)C)C(C)C	36.91	0.75
DRA	MOL000359	sitosterol	CCC(CCC(C)C1CCC2C1(CCC3C2CC=C4C3(CCC(C4)O)C)C)C(C)C	36.91	0.75
DRA	MOL008188	Japonine	CN1C2=C(C=C(C=C2)OC)C(=O)C(=C1C3=CC=CC=C3)OC	44.11	0.25
DRA	MOL009322	Sylvestroside III	CC1C(CC2C1C(OC=C2C(=O)OC)O)OC(=O)C3=COC(C(C3CC=O)C=C)OC4C(C(C(C(O4)CO)O)O)O	48.02	0.53
CRH	MOL001494	Mandenol	CCCCCC=CCC=CCCCCCCCC(=O)OCC	42	0.19
CRH	MOL002135	Myricanone	COC1=C(C(=C2CCCCC(=O)CCC3=CC(=C(C=C3)O)C1=C2)O)OC	40.6	0.51
CRH	MOL002140	Perlolyrine	C1=CC=C2C(=C1)C3=C(N2)C(=NC=C3)C4=CC=C(O4)CO	65.95	0.27
CRH	MOL002151	senkyunone	CC1=CC(=O)C=C(C1=O)CC=C(C)CCC=C(C)CCC=C(C)C	47.66	0.24
CRH	MOL002157	wallichilide	CCCCC(=O)C12CCC(C=C1C(=O)OC)C3C2C4=C(CC3)C(=CCCC)OC4=O	42.31	0.71
CRH	MOL000359	sitosterol	CCC(CCC(C)C1CCC2C1(CCC3C2CC=C4C3(CCC(C4)O)C)C)C(C)C	36.91	0.75
CRH	MOL000433	FA	C1=CC(=CC=C1C(=O)NC(CCC(=O)O)C(=O)O)NCC2=CN=C3C(=N2)C(=O)N=C(N3)N	68.96	0.71
PPL	MOL000098	quercetin	C1=CC(=C(C=C1C2=C(C(=O)C3=C(C=C(C=C3O2)O)O)O)O)O	46.43	0.28
PPL	MOL000422	kaempferol	C1=CC(=CC=C1C2=C(C(=O)C3=C(C=C(C=C3O2)O)O)O)O	41.88	0.24
PPL	MOL000211	Mairin	CC(=C)C1CCC2(C1C3CCC4C5(CCC(C(C5CCC4(C3(CC2)C)C)(C)C)O)C)C(=O)O	55.38	0.78
PPL		Apigenin 7-glucuronide	C1=CC(=CC=C1C2=CC(=O)C3=C(C=C(C=C3O2)OC4C(C(C(C(O4)C(=O)O)O)O)O)O)O
PPL		Apigenin 6,8-di-C-glucoside	C1=CC(=CC=C1C2=CC(=O)C3=C(O2)C(=C(C(=C3O)C4C(C(C(C(O4)CO)O)O)O)O)C5C(C(C(C(O5)CO)O)O)O)O
PPL		Hesperidin	CC1C(C(C(C(O1)OCC2C(C(C(C(O2)OC3=CC(=C4C(=O)CC(OC4=C3)C5=CC(=C(C=C5)OC)O)O)O)O)O)O)O)O
PPL		Luteolin 3-glucuronide	C1=CC(=C(C=C1C2=CC(=O)C3=C(C=C(C=C3O2)O)O)OC4C(C(C(C(O4)C(=O)O)O)O)O)O
PPL		Rosmarinic acid	C1=CC(=C(C=C1CC(C(=O)O)OC(=O)C=CC2=CC(=C(C=C2)O)O)O)O
SWH	MOL000359	beta-sitosterol	CCC(CCC(C)C1CCC2C1(CCC3C2CC=C4C3(CCC(C4)O)C)C)C(C)C	36.91	0.75
SWH	MOL010585	Daucosterol	CCC(CCC(C)C1CCC2C1(CCC3C2CC=C4C3(CCC(C4)OC5C(C(C(C(O5)CO)O)O)O)C)C)C(C)C	37.23	0.76
SWH	MOL000519	coniferin	CC(CO)C1=C(C2=C(C3=C(C=C2)C(CCC3)(C)C)C(=O)C1=O)O	31.11	0.32
SWH	MOL000561	astragalin	C1=CC(=CC=C1C2=C(C(=O)C3=C(C=C(C=C3O2)O)O)OC4C(C(C(C(O4)CO)O)O)O)O	14.03	0.74
SWH	MOL000347	syringin	COC1=CC(=CC(=C1OC2C(C(C(C(O2)CO)O)O)O)OC)C=CCO	14.64	0.32
SWH		griselinoside	COC(=O)C1CC(=O)C2C1C(OC=C2C(=O)OC)OC3C(C(C(C(O3)CO)O)O)O
ASE	MOL000953	Cholesterol (JP15/NF)	CC(C)CCCC(C)C1CCC2C1(CCC3C2CC=C4C3(CCC(C4)O)C)C	37.87	0.68
ASE	MOL009057	liriodendrin	COC1=CC(=CC(=C1OC2C(C(C(C(O2)CO)O)O)O)OC)C3C4COC(C4CO3)C5=CC(=C(C(=C5)OC)OC6C(C(C(C(O6)CO)O)O)O)OC	53.14	0.8
ASE	MOL001558	Sesamin	C1C2C(COC2C3=CC4=C(C=C3)OCO4)C(O1)C5=CC6=C(C=C5)OCO6	56.55	0.83
ASE	MOL001525	Daucosterol	CCC(CCC(C)C1CCC2C1(CCC3C2CC=C4C3(CCC(C4)OC5C(C(C(C(O5)CO)O)O)O)C)C)C(C)C	36.91	0.75
ASE	MOL000296	hederagenin	CC1(CCC2(CCC3(C(=CCC4C3(CCC5C4(CCC(C5(C)CO)O)C)C)C2C1)C)C(=O)O)C	36.91	0.75
ASE	MOL000519	coniferin	CC(CO)C1=C(C2=C(C3=C(C=C2)C(CCC3)(C)C)C(=O)C1=O)O	31.11	0.32
ASE	MOL008599	Ethyl oleate	CCCCCCCCC=CCCCCCCCC(=O)OCC	32.4	0.19
ASE	MOL002875	Methyl oleate	CCCCCCCC/C=C/CCCCCCCC(=O)OC	31.9	0.17
CSR	MOL000422	kaempferol	C1=CC(=CC=C1C2=C(C(=O)C3=C(C=C(C=C3O2)O)O)O)O	41.88	0.24
CSR	MOL002284	Piceatannol	C1=CC(=C(C=C1C=CC2=CC(=CC(=C2)O)O)O)O	72.29	0.15
CSR	MOL001689	Acacetin	COC1=CC=C(C=C1)C2=CC(=O)C3=C(C=C(C=C3O2)O)O	34.97	0.24
CSR		caraganaphenol A	C1=CC(=CC=C1C2C(C(C3=C4C(C(OC4=CC(=C23)O)C5=CC=C(C=C5)O)C6=CC(=CC7=C6C(C(O7)C8=CC=C(C=C8)O)C9=CC(=CC(=C9)O)O)O)C(=O)C1=CC=C(C=C1)O)C1=CC(=CC(=C1)O)O)O
CSR		carasinaurone	COC1=C2C(=CC(=C1)O)OC(C2=O)(CC3=CC=C(C=C3)O)O
CSR		kobophenol A	C1=CC(=CC=C1C2C(C(C(O2)C3=CC=C(C=C3)O)C4=CC(=CC5=C4C(C(O5)C6=CC=C(C=C6)O)C7=CC(=CC8=C7C(C(O8)C9=CC=C(C=C9)O)C1=CC(=CC(=C1)O)O)O)O)C1=CC(=CC(=C1)O)O)O
CSR		Kobophenol B	C1=CC(=CC=C1[C@H]2[C@@H](C3=C4[C@@H]5C(C6C(=O)C=C7[C@@]5(C6=O)[C@@H](C(C4=C(C=C3O2)O)C8=CC(=CC9=C8C7[C@@H](O9)C1=CC=C(C=C1)O)O)C1=CC=C(C=C1)O)C1=CC=C(C=C1)O)C1=CC(=CC(=C1)O)O)O
CSR		carasinol B	C1=CC(=CC=C1C2C(C(C(O2)C3=CC=C(C=C3)O)C4=CC(=CC5=C4C(C(O5)C6=CC=C(C=C6)O)C7=CC(=CC8=C7C(C(O8)C9=CC=C(C=C9)O)C1=CC(=CC(=C1)O)O)O)O)C1=CC(=CC(=C1)O)O)O
CSR		(+)-α-viniferin	C1=CC(=CC=C1C2C3C4=CC(=CC5=C4C(C(O5)C6=CC=C(C=C6)O)C7=CC(=CC8=C7C(C(O8)C9=CC=C(C=C9)O)C1=CC(=CC(=C31)O2)O)O)O)O
CSR		miyabenol C	C1=CC(=CC=C1C=CC2=CC(=CC3=C2C(C(O3)C4=CC=C(C=C4)O)C5=CC(=CC6=C5C(C(O6)C7=CC=C(C=C7)O)C8=CC(=CC(=C8)O)O)O)O)O
