# Supplementary material for: Identifying Synergistic Mechanisms of Multiple Ingredients in Shuangbai Tablets against Proteinuria by Virtual Screening and a Network Pharmacology Approach
Source: Evid Based Complement Alternat Med. 2020 Jan 6;2020:1027271. doi: 10.1155/2020/1027271 (PMC6984745; doi:10.1155/2020/1027271)
Supplement: Supplementary Materials — Supplementary Table 1: 118 active ingredients in Shuangbai Tablets. Supplementary Table 2: 8981 targets of the active ingredients in Shuangbai Tablets. Supplementary Table 3: 110 523 genes associated with proteinuria. Supplementary Table 4: candidate targets with therapeutic proteinuria. Supplementary Table 5: 172 pairs of protein interactions of candidate targets. Supplementary Table 6: specific analytical parameters of 41 central targets. [file 1027271.f1.zip › 1027271.f1/Table 2-The targets of the active ingredients.xlsx]

## Sheet: Sheet1
TCM	Mol ID	Compound	Terget	Common name	Uniprot ID	Database
baimaogen	MOL000449	Stigmasterol	Alcohol dehydrogenase 1C	ADH1B	P00325	TCMSP
baimaogen	MOL000449	Stigmasterol	Alpha-2A adrenergic receptor	ADRA2A	P08913	TCMSP
baimaogen	MOL001876	6-Methoxyflavone	Androgen receptor	AR	P10275	TCMSP
baimaogen	MOL001876	6-Methoxyflavone	Beta-1 adrenergic receptor	ADRB1	P08588	TCMSP
baimaogen	MOL000387	Bifendate	Calcium-activated potassium channel subunit alpha 1	KCNMA1	Q12791	TCMSP
baimaogen	MOL001870	LUTEOLINIDIN	Carbonic anhydrase II	CA II	Q6LD99	TCMSP
baimaogen	MOL000387	Bifendate	DNA topoisomerase II	TOP2B	Q02880	TCMSP
baimaogen	MOL000358	beta-sitosterol	Dopamine D1 receptor	DRD1	P21728	TCMSP
baimaogen	MOL001876	6-Methoxyflavone	Dopamine D1 receptor	DRD1	P21728	TCMSP
baimaogen	MOL001870	LUTEOLINIDIN	Heat shock protein HSP 90	HSP 90	P08238	TCMSP
baimaogen	MOL000358	beta-sitosterol	Heat shock protein HSP 90	HSP 90	P08238	TCMSP
baimaogen	MOL000387	Bifendate	Heat shock protein HSP 90	HSP 90	P08238	TCMSP
baimaogen	MOL000387	Bifendate	Hepatocyte growth factor receptor	HGF	P14210	TCMSP
baimaogen	MOL000449	Stigmasterol	Ig gamma-1 chain C region	IGHG1	P01857	TCMSP
baimaogen	MOL000449	Stigmasterol	Mineralocorticoid receptor	NR3C2	P08235	TCMSP
baimaogen	MOL001876	6-Methoxyflavone	Muscarinic acetylcholine receptor M1	CHRM1	P11229	TCMSP
baimaogen	MOL000358	beta-sitosterol	Muscarinic acetylcholine receptor M3	CHRM3	P20309	TCMSP
baimaogen	MOL001876	6-Methoxyflavone	Muscarinic acetylcholine receptor M3	CHRM3	P20309	TCMSP
baimaogen	MOL001876	6-Methoxyflavone	Nitric oxide synthase, inducible	NOS2	P35228	TCMSP
baimaogen	MOL000449	Stigmasterol	Nuclear receptor coactivator 1	NCOA1	Q15788	TCMSP
baimaogen	MOL001870	LUTEOLINIDIN	Nuclear receptor coactivator 2	NCoA-2	Q15596	TCMSP
baimaogen	MOL000358	beta-sitosterol	Nuclear receptor coactivator 2	NCoA-2	Q15596	TCMSP
baimaogen	MOL000449	Stigmasterol	Nuclear receptor coactivator 2	NCoA-2	Q15596	TCMSP
baimaogen	MOL000358	beta-sitosterol	Phosphatidylinositol-4,5-bisphosphate 3-kinase catalytic subunit, gamma isoform	PIK3CG	P48736	TCMSP
baimaogen	MOL000358	beta-sitosterol	Potassium voltage-gated channel subfamily H member 2	KCNH2	Q12809	TCMSP
baimaogen	MOL000358	beta-sitosterol	Progesterone receptor	PGR	P06401	TCMSP
baimaogen	MOL000449	Stigmasterol	Progesterone receptor	PGR	P06401	TCMSP
baimaogen	MOL001870	LUTEOLINIDIN	Prostaglandin G/H synthase 1	PTGS1	P23219	TCMSP
baimaogen	MOL000358	beta-sitosterol	Prostaglandin G/H synthase 1	PTGS1	P23219	TCMSP
baimaogen	MOL000387	Bifendate	Prostaglandin G/H synthase 1	PTGS1	P23219	TCMSP
baimaogen	MOL000449	Stigmasterol	Prostaglandin G/H synthase 1	PTGS1	P23219	TCMSP
baimaogen	MOL001876	6-Methoxyflavone	Prostaglandin G/H synthase 1	PTGS1	P23219	TCMSP
baimaogen	MOL001870	LUTEOLINIDIN	Prostaglandin G/H synthase 2	PTGS2	P35354	TCMSP
baimaogen	MOL000358	beta-sitosterol	Prostaglandin G/H synthase 2	PTGS2	P35354	TCMSP
baimaogen	MOL000387	Bifendate	Prostaglandin G/H synthase 2	PTGS2	P35354	TCMSP
baimaogen	MOL000449	Stigmasterol	Prostaglandin G/H synthase 2	PTGS2	P35354	TCMSP
baimaogen	MOL001876	6-Methoxyflavone	Prostaglandin G/H synthase 2	PTGS2	P35354	TCMSP
baimaogen	MOL000449	Stigmasterol	Retinoic acid receptor RXR-alpha	RXRA	P19793	TCMSP
baimaogen	MOL001876	6-Methoxyflavone	Sodium channel protein type 5 subunit alpha	SCN5A	Q14524	TCMSP
baishao	MOL000422	kaempferol	3 beta-hydroxysteroid dehydrogenase/Delta 5-->4-isomerase type 1	HSD3B2	P26439	TCMSP
baishao	MOL000422	kaempferol	Acetylcholinesterase	ACHE	P22303	TCMSP
baishao	MOL000422	kaempferol	Activator of 90 kDa heat shock protein ATPase homolog 1	AHSA1	O95433	TCMSP
baishao	MOL000422	kaempferol	Aldo-keto reductase family 1 member C3	AKR1C3	P42330	TCMSP
baishao	MOL000422	kaempferol	Alpha-1B adrenergic receptor	ADRA1B	P35368	TCMSP
baishao	MOL000422	kaempferol	Androgen receptor	AR	P10275	TCMSP
baishao	MOL000422	kaempferol	Antileukoproteinase	SLPI	P03973	TCMSP
baishao	MOL000422	kaempferol	Apoptosis regulator BAX	BAX	Q07812	TCMSP
baishao	MOL000422	kaempferol	Apoptosis regulator Bcl-2	P10415	BCL2	TCMSP
baishao	MOL000422	kaempferol	Arachidonate 5-lipoxygenase	P09917	ALOX5	TCMSP
baishao	MOL000422	kaempferol	Aryl hydrocarbon receptor	P35869	AHR	TCMSP
baishao	MOL000492	(+)-catechin	Beta-lactamase	LACTB2	Q53H82	TCMSP
baishao	MOL000422	kaempferol	Calmodulin	CALM1	P0DP23	TCMSP
baishao	MOL000492	(+)-catechin	Calmodulin	CALM1	P0DP23	TCMSP
baishao	MOL000422	kaempferol	Caspase-3	CASP3	P42574	TCMSP
baishao	MOL000492	(+)-catechin	Catalase	CAT	P04040	TCMSP
baishao	MOL000422	kaempferol	Cell division control protein 2 homolog	CDK1	P06493	TCMSP
baishao	MOL000422	kaempferol	Coagulation factor VII	F7	P08709	TCMSP
baishao	MOL000422	kaempferol	Cytochrome P450 1A1	CYP1A1	P04798	TCMSP
baishao	MOL000422	kaempferol	Cytochrome P450 1A2	CYP1A2	P05177	TCMSP
baishao	MOL000422	kaempferol	Cytochrome P450 1B1	CYP1B1	Q16678	TCMSP
baishao	MOL000422	kaempferol	Cytochrome P450 3A4	CYP3A4	P08684	TCMSP
baishao	MOL000422	kaempferol	Dipeptidyl peptidase IV	DPP4	P27487	TCMSP
baishao	MOL000422	kaempferol	DNA topoisomerase II	TOP2B	Q02880	TCMSP
baishao	MOL000358	beta-sitosterol	Dopamine D1 receptor	DRD1	P21728	TCMSP
baishao	MOL000422	kaempferol	E-selectin	SELE	P16581	TCMSP
baishao	MOL000492	(+)-catechin	Estrogen receptor	ESR1	P03372	TCMSP
baishao	MOL001918	paeoniflorgenone	Gamma-aminobutyric acid receptor subunit alpha-1	GABRA1	P14867	TCMSP
baishao	MOL000422	kaempferol	Gamma-aminobutyric acid receptor subunit alpha-1	GABRA1	P14867	TCMSP
baishao	MOL000422	kaempferol	Gamma-aminobutyric-acid receptor alpha-2 subunit	GABRA2	P47869	TCMSP
baishao	MOL000422	kaempferol	Glutathione S-transferase Mu 1	GSTM1	P09488	TCMSP
baishao	MOL000422	kaempferol	Glutathione S-transferase Mu 2	GSTM2	P28161	TCMSP
baishao	MOL000422	kaempferol	Glutathione S-transferase P	GSTP1	P09211	TCMSP
baishao	MOL000358	beta-sitosterol	Heat shock protein HSP 90	HSP 90	P08238	TCMSP
baishao	MOL000422	kaempferol	Heat shock protein HSP 90	HSP 90	P08238	TCMSP
baishao	MOL000492	(+)-catechin	Heat shock protein HSP 90	HSP 90	P08238	TCMSP
baishao	MOL000422	kaempferol	Heme oxygenase 1	HMOX1	P09601	TCMSP
baishao	MOL000422	kaempferol	Hyaluronan synthase 2	HAS2	Q92819	TCMSP
baishao	MOL000492	(+)-catechin	Hyaluronan synthase 2	HAS2	Q92819	TCMSP
baishao	MOL000422	kaempferol	Inhibitor of nuclear factor kappa-B kinase subunit beta	CHUK	O15111	TCMSP
baishao	MOL000422	kaempferol	Insulin receptor	INSR	P06213	TCMSP
baishao	MOL000422	kaempferol	Intercellular adhesion molecule 1	ICAM1	P05362	TCMSP
baishao	MOL001924	paeoniflorin	Interleukin-6	IL6	P05231	TCMSP
baishao	MOL000422	kaempferol	Interstitial collagenase	MMP1	P03956	TCMSP
baishao	MOL001924	paeoniflorin	Lipopolysaccharide-binding protein	LBP	P18428	TCMSP
baishao	MOL001919	(3S,5R,8R,9R,10S,14S)-3,17-dihydroxy-4,4,8,10,14-pentamethyl-2,3,5,6,7,9-hexahydro-1H-cyclopenta[a]phenanthrene-15,16-dione	Mineralocorticoid receptor	NR3C2	P08235	TCMSP
baishao	MOL000359	sitosterol	Mineralocorticoid receptor	NR3C2	P08235	TCMSP
baishao	MOL000422	kaempferol	Mitogen-activated protein kinase 8	MAPK8	P45983	TCMSP
baishao	MOL001924	paeoniflorin	Monocyte differentiation antigen CD14	CD14	P08571	TCMSP
baishao	MOL000358	beta-sitosterol	mRNA of PKA Catalytic Subunit C-alpha	PRKACA	P17612	TCMSP
baishao	MOL000422	kaempferol	mRNA of PKA Catalytic Subunit C-alpha	PRKACA	P17612	TCMSP
baishao	MOL000492	(+)-catechin	mRNA of PKA Catalytic Subunit C-alpha	PRKACA	P17612	TCMSP
baishao	MOL000422	kaempferol	Muscarinic acetylcholine receptor M1	CHRM1	P11229	TCMSP
baishao	MOL000422	kaempferol	Muscarinic acetylcholine receptor M2	CHRM2	P08172	TCMSP
baishao	MOL000358	beta-sitosterol	Muscarinic acetylcholine receptor M3	CHRM3	P20309	TCMSP
baishao	MOL000422	kaempferol	Nitric oxide synthase, inducible	NOS2	P35228	TCMSP
baishao	MOL000422	kaempferol	Nitric-oxide synthase, endothelial	NOS3	P29474	TCMSP
baishao	MOL000358	beta-sitosterol	Nuclear receptor coactivator 2	NCoA-2	Q15596	TCMSP
baishao	MOL000359	sitosterol	Nuclear receptor coactivator 2	NCoA-2	Q15596	TCMSP
baishao	MOL000422	kaempferol	Nuclear receptor coactivator 2	NCoA-2	Q15596	TCMSP
baishao	MOL000492	(+)-catechin	Nuclear receptor coactivator 2	NCoA-2	Q15596	TCMSP
baishao	MOL000422	kaempferol	Nuclear receptor subfamily 1 group I member 2	NR1I2	O75469	TCMSP
baishao	MOL000422	kaempferol	Nuclear receptor subfamily 1 group I member 3	NR1I3	Q14994	TCMSP
baishao	MOL000422	kaempferol	Peroxidase C1A	PRXC1A	P00433	TCMSP
baishao	MOL000422	kaempferol	Peroxisome proliferator activated receptor gamma	PPARG	P37231	TCMSP
baishao	MOL000422	kaempferol	Peroxisome proliferator-activated receptor gamma	PPARG	P37231	TCMSP
baishao	MOL000358	beta-sitosterol	Phosphatidylinositol-4,5-bisphosphate 3-kinase catalytic subunit, gamma isoform	PIK3CG	P48736	TCMSP
baishao	MOL000422	kaempferol	Phosphatidylinositol-4,5-bisphosphate 3-kinase catalytic subunit, gamma isoform	PIK3CG	P48736	TCMSP
baishao	MOL000358	beta-sitosterol	Potassium voltage-gated channel subfamily H member 2	KCNH2	Q12809	TCMSP
baishao	MOL001919	(3S,5R,8R,9R,10S,14S)-3,17-dihydroxy-4,4,8,10,14-pentamethyl-2,3,5,6,7,9-hexahydro-1H-cyclopenta[a]phenanthrene-15,16-dione	Progesterone receptor	PGR	P06401	TCMSP
baishao	MOL000211	Mairin	Progesterone receptor	PGR	P06401	TCMSP
baishao	MOL000358	beta-sitosterol	Progesterone receptor	PGR	P06401	TCMSP
baishao	MOL000359	sitosterol	Progesterone receptor	PGR	P06401	TCMSP
baishao	MOL000422	kaempferol	Progesterone receptor	PGR	P06401	TCMSP
baishao	MOL000358	beta-sitosterol	Prostaglandin G/H synthase 1	PTGS1	P23219	TCMSP
baishao	MOL000422	kaempferol	Prostaglandin G/H synthase 1	PTGS1	P23219	TCMSP
baishao	MOL000492	(+)-catechin	Prostaglandin G/H synthase 1	PTGS1	P23219	TCMSP
baishao	MOL000358	beta-sitosterol	Prostaglandin G/H synthase 2	PTGS2	P35354	TCMSP
baishao	MOL000422	kaempferol	Prostaglandin G/H synthase 2	PTGS2	P35354	TCMSP
baishao	MOL000492	(+)-catechin	Prostaglandin G/H synthase 2	PTGS2	P35354	TCMSP
baishao	MOL000422	kaempferol	RAC-alpha serine/threonine-protein kinase	AKT1	P31749	TCMSP
baishao	MOL000492	(+)-catechin	Retinoic acid receptor RXR-alpha	RXRA	P19793	TCMSP
baishao	MOL000422	kaempferol	Serine/threonine-protein phosphatase 2B catalytic subunit alpha isoform	PPP3CA	Q08209	TCMSP
baishao	MOL000422	kaempferol	Signal transducer and activator of transcription 1-alpha/beta	STAT1	P42224	TCMSP
baishao	MOL000422	kaempferol	Sodium-dependent noradrenaline transporter	SLC6A2	P23975	TCMSP
baishao	MOL000422	kaempferol	Solute carrier family 2, facilitated glucose transporter member 4	SLC2A4	P14672	TCMSP
chishao	MOL000449	Stigmasterol	26S proteasome non-ATPase regulatory subunit 3	PSMD3	O43242	TCMSP
chishao	MOL001002	ellagic acid	72 kDa type IV collagenase	MMP2	P08253	TCMSP
chishao	MOL000449	Stigmasterol	Alcohol dehydrogenase 1C	ADH1B	P00325	TCMSP
chishao	MOL000449	Stigmasterol	Aldose reductase	P15121	AKR1B1	TCMSP
chishao	MOL000449	Stigmasterol	Alpha-1A adrenergic receptor	P35348	ADRA1A	TCMSP
chishao	MOL000449	Stigmasterol	Alpha-1B adrenergic receptor	ADRA1B	P35368	TCMSP
chishao	MOL000449	Stigmasterol	Alpha-2A adrenergic receptor	ADRA2A	P08913	TCMSP
chishao	MOL000449	Stigmasterol	Amine oxidase [flavin-containing] A	MAOA	P21397	TCMSP
chishao	MOL000449	Stigmasterol	Amine oxidase [flavin-containing] B	MAOB	P27338	TCMSP
chishao	MOL001002	ellagic acid	Androgen receptor	AR	P10275	TCMSP
chishao	MOL002714	baicalein	Androgen receptor	AR	P10275	TCMSP
chishao	MOL002714	baicalein	Apolipoprotein D	APOD	P05090	TCMSP
chishao	MOL002714	baicalein	Apoptosis regulator BAX	BAX	Q07812	TCMSP
chishao	MOL002714	baicalein	Apoptosis regulator Bcl-2	P10415	BCL2	TCMSP
chishao	MOL002714	baicalein	Arachidonate 12-lipoxygenase, 12S-type	P18054	ALOX12	TCMSP
chishao	MOL002714	baicalein	Aryl hydrocarbon receptor	P35869	AHR	TCMSP
chishao	MOL000449	Stigmasterol	Beta-1 adrenergic receptor	ADRB1	P08588	TCMSP
chishao	MOL000449	Stigmasterol	Beta-2 adrenergic receptor	ADRB2	P07550	TCMSP
chishao	MOL002714	baicalein	Calmodulin	CALM1	P0DP23	TCMSP
chishao	MOL002714	baicalein	Caspase-3	CASP3	P42574	TCMSP
chishao	MOL002714	baicalein	Cell division control protein 2 homolog	CDK1	P06493	TCMSP
chishao	MOL001002	ellagic acid	Cell division protein kinase 2	CDK2	P24941	TCMSP
chishao	MOL002714	baicalein	Cellular tumor antigen p53	TP53	P04637	TCMSP
chishao	MOL002714	baicalein	CGMP-inhibited 3',5'-cyclic phosphodiesterase A	PDE3A	Q14432	TCMSP
chishao	MOL000449	Stigmasterol	Chymotrypsinogen B	CTRB1	P17538	TCMSP
chishao	MOL002776	Baicalin	Coagulation factor Xa	F9	P00740	TCMSP
chishao	MOL001002	ellagic acid	Cyclin-dependent kinase inhibitor 1	CDKN1A	P38936	TCMSP
chishao	MOL002714	baicalein	Cytochrome c	CYC1	P08574	TCMSP
chishao	MOL002714	baicalein	Dipeptidyl peptidase IV	DPP4	P27487	TCMSP
chishao	MOL000358	beta-sitosterol	Dopamine D1 receptor	DRD1	P21728	TCMSP
chishao	MOL002714	baicalein	Egl nine homolog 1	EGLN1	Q9GZT9	TCMSP
chishao	MOL001002	ellagic acid	Estrogen receptor	ESR1	P03372	TCMSP
chishao	MOL002714	baicalein	Fatty acid-binding protein, epidermal	FABP5	Q01469	TCMSP
chishao	MOL002714	baicalein	Fos-related antigen 1	FOSL1	P15407	TCMSP
chishao	MOL002714	baicalein	Fos-related antigen 2	FOSL2	P15408	TCMSP
chishao	MOL002714	baicalein	G2/mitotic-specific cyclin-B1	CCNB1	P14635	TCMSP
chishao	MOL001918	paeoniflorgenone	Gamma-aminobutyric acid receptor subunit alpha-1	GABRA1	P14867	TCMSP
chishao	MOL000449	Stigmasterol	Gamma-aminobutyric acid receptor subunit alpha-1	GABRA1	P14867	TCMSP
chishao	MOL000449	Stigmasterol	Gamma-aminobutyric-acid receptor alpha-3 subunit	GABRA2	P47869	TCMSP
chishao	MOL001002	ellagic acid	Glutathione S-transferase A1	GSTA1	P08263	TCMSP
chishao	MOL001002	ellagic acid	Glutathione S-transferase A2	GSTA2	P09210	TCMSP
chishao	MOL001002	ellagic acid	Glutathione S-transferase Mu 1	GSTM1	P09488	TCMSP
chishao	MOL001002	ellagic acid	Glutathione S-transferase Mu 2	GSTM2	P28161	TCMSP
chishao	MOL001002	ellagic acid	Glutathione S-transferase P	GSTP1	P09211	TCMSP
chishao	MOL001002	ellagic acid	Heat shock protein HSP 90	HSP 90	P08238	TCMSP
chishao	MOL002714	baicalein	Heat shock protein HSP 90	HSP 90	P08238	TCMSP
chishao	MOL000358	beta-sitosterol	Heat shock protein HSP 90	HSP 90	P08238	TCMSP
chishao	MOL002714	baicalein	Hypoxia-inducible factor 1-alpha	HIF1A	Q16665	TCMSP
chishao	MOL000449	Stigmasterol	Ig gamma-1 chain C region	IGHG1	P01857	TCMSP
chishao	MOL001002	ellagic acid	Insulin-like growth factor II	IGF2	P01344	TCMSP
chishao	MOL002714	baicalein	Insulin-like growth factor II	IGF2	P01344	TCMSP
chishao	MOL001924	paeoniflorin	Interleukin-6	IL6	P05231	TCMSP
chishao	MOL001002	ellagic acid	Interleukin-8	CXCL8	P10145	TCMSP
chishao	MOL000449	Stigmasterol	Leukotriene A-4 hydrolase	LTA4H	P09960	TCMSP
chishao	MOL001924	paeoniflorin	Lipopolysaccharide-binding protein	LBP	P18428	TCMSP
chishao	MOL001002	ellagic acid	Matrix metalloproteinase-9	MMP9	P14780	TCMSP
chishao	MOL002714	baicalein	Matrix metalloproteinase-9	MMP9	P14780	TCMSP
chishao	MOL000359	sitosterol	Mineralocorticoid receptor	NR3C2	P08235	TCMSP
chishao	MOL000449	Stigmasterol	Mineralocorticoid receptor	NR3C2	P08235	TCMSP
chishao	MOL001924	paeoniflorin	Monocyte differentiation antigen CD14	CD14	P08571	TCMSP
chishao	MOL002714	baicalein	mRNA of PKA Catalytic Subunit C-alpha	PRKACA	P17612	TCMSP
chishao	MOL000358	beta-sitosterol	mRNA of PKA Catalytic Subunit C-alpha	PRKACA	P17612	TCMSP
chishao	MOL000449	Stigmasterol	mRNA of PKA Catalytic Subunit C-alpha	PRKACA	P17612	TCMSP
chishao	MOL002776	Baicalin	mRNA of Protein-tyrosine phosphatase, non-receptor type 1	PTPN6	P29350	TCMSP
chishao	MOL000449	Stigmasterol	Muscarinic acetylcholine receptor M1	CHRM1	P11229	TCMSP
chishao	MOL000449	Stigmasterol	Muscarinic acetylcholine receptor M2	CHRM2	P08172	TCMSP
chishao	MOL000358	beta-sitosterol	Muscarinic acetylcholine receptor M3	CHRM3	P20309	TCMSP
chishao	MOL000449	Stigmasterol	Muscarinic acetylcholine receptor M3	CHRM3	P20309	TCMSP
chishao	MOL002714	baicalein	Myeloperoxidase	MPO	P05164	TCMSP
chishao	MOL002714	baicalein	NADPH oxidase 5	NOX5	Q96PH1	TCMSP
chishao	MOL000449	Stigmasterol	Neuronal acetylcholine receptor protein, alpha-7 chain	CHRNA7	P36544	TCMSP
chishao	MOL001002	ellagic acid	NF-kappa-B inhibitor alpha	NFKBIA	P25963	TCMSP
chishao	MOL002714	baicalein	Nuclear factor of activated T-cells, cytoplasmic 1	NFATC1	O95644	TCMSP
chishao	MOL002714	baicalein	Nuclear receptor coactivator 1	NCOA1	Q15788	TCMSP
chishao	MOL000449	Stigmasterol	Nuclear receptor coactivator 1	NCOA1	Q15788	TCMSP
chishao	MOL002714	baicalein	Nuclear receptor coactivator 2	NCoA-2	Q15596	TCMSP
chishao	MOL000358	beta-sitosterol	Nuclear receptor coactivator 2	NCoA-2	Q15596	TCMSP
chishao	MOL000359	sitosterol	Nuclear receptor coactivator 2	NCoA-2	Q15596	TCMSP
chishao	MOL000449	Stigmasterol	Nuclear receptor coactivator 2	NCoA-2	Q15596	TCMSP
chishao	MOL002714	baicalein	Phosphatidylinositol-4,5-bisphosphate 3-kinase catalytic subunit, gamma isoform	PIK3CG	P48736	TCMSP
chishao	MOL000358	beta-sitosterol	Phosphatidylinositol-4,5-bisphosphate 3-kinase catalytic subunit, gamma isoform	PIK3CG	P48736	TCMSP
chishao	MOL000358	beta-sitosterol	Potassium voltage-gated channel subfamily H member 2	KCNH2	Q12809	TCMSP
chishao	MOL001002	ellagic acid	Progesterone receptor	PGR	P06401	TCMSP
chishao	MOL000358	beta-sitosterol	Progesterone receptor	PGR	P06401	TCMSP
chishao	MOL000359	sitosterol	Progesterone receptor	PGR	P06401	TCMSP
chishao	MOL000449	Stigmasterol	Progesterone receptor	PGR	P06401	TCMSP
chishao	MOL002714	baicalein	Prostaglandin G/H synthase 1	PTGS1	P23219	TCMSP
chishao	MOL000358	beta-sitosterol	Prostaglandin G/H synthase 1	PTGS1	P23219	TCMSP
chishao	MOL000449	Stigmasterol	Prostaglandin G/H synthase 1	PTGS1	P23219	TCMSP
chishao	MOL002714	baicalein	Prostaglandin G/H synthase 2	PTGS2	P35354	TCMSP
chishao	MOL000358	beta-sitosterol	Prostaglandin G/H synthase 2	PTGS2	P35354	TCMSP
chishao	MOL000449	Stigmasterol	Prostaglandin G/H synthase 2	PTGS2	P35354	TCMSP
chishao	MOL001002	ellagic acid	Protein kinase C beta type	PRKCD	Q05655	TCMSP
chishao	MOL002714	baicalein	Proto-oncogene c-Fos	FOS	P01100	TCMSP
chishao	MOL002714	baicalein	RAC-alpha serine/threonine-protein kinase	AKT1	P31749	TCMSP
chishao	MOL000449	Stigmasterol	Retinoic acid receptor RXR-alpha	RXRA	P19793	TCMSP
chishao	MOL000449	Stigmasterol	Sodium channel protein type 5 subunit alpha	SCN5A	Q14524	TCMSP
chishao	MOL000449	Stigmasterol	Sodium-dependent dopamine transporter	SLC6A3	Q01959	TCMSP
chishao	MOL000449	Stigmasterol	Sodium-dependent noradrenaline transporter	SLC6A2	P23975	TCMSP
chuanqiong	MOL002135	Myricanone	Androgen receptor	AR	P10275	TCMSP
chuanqiong	MOL002135	Myricanone	Beta-2 adrenergic receptor	ADRB2	P07550	TCMSP
chuanqiong	MOL000433	FA	Cell division protein kinase 2	CDK2	P24941	TCMSP
chuanqiong	MOL002135	Myricanone	CGMP-inhibited 3',5'-cyclic phosphodiesterase A	PDE3A	Q14432	TCMSP
chuanqiong	MOL002135	Myricanone	Coagulation factor VII	F7	P08709	TCMSP
chuanqiong	MOL002135	Myricanone	Cyclin-A2	CCNA2	P20248	TCMSP
chuanqiong	MOL002135	Myricanone	Dipeptidyl peptidase IV	DPP4	P27487	TCMSP
chuanqiong	MOL000359	sitosterol	Dopamine D1 receptor	DRD1	P21728	TCMSP
chuanqiong	MOL002135	Myricanone	Estrogen receptor	ESR1	P03372	TCMSP
chuanqiong	MOL002135	Myricanone	Estrogen receptor beta	ESR1	P03372	TCMSP
chuanqiong	MOL002157	wallichilide	Glucocorticoid receptor	GJA1	P17302	TCMSP
chuanqiong	MOL002135	Myricanone	Glycogen synthase kinase-3 beta	GSK3B	P49841	TCMSP
chuanqiong	MOL000433	FA	Glycogen synthase kinase-3 beta	GSK3B	P49841	TCMSP
chuanqiong	MOL002135	Myricanone	Heat shock protein HSP 90	HSP 90	P08238	TCMSP
chuanqiong	MOL000359	sitosterol	Heat shock protein HSP 90	HSP 90	P08238	TCMSP
chuanqiong	MOL002135	Myricanone	Ig gamma-1 chain C region	IGHG1	P01857	TCMSP
chuanqiong	MOL002157	wallichilide	Mineralocorticoid receptor	NR3C2	P08235	TCMSP
chuanqiong	MOL000359	sitosterol	Mineralocorticoid receptor	NR3C2	P08235	TCMSP
chuanqiong	MOL002135	Myricanone	Mitogen-activated protein kinase 14	MAPK14	Q16539	TCMSP
chuanqiong	MOL002140	Perlolyrine	mRNA of PKA Catalytic Subunit C-alpha	PRKACA	P17612	TCMSP
chuanqiong	MOL000359	sitosterol	mRNA of PKA Catalytic Subunit C-alpha	PRKACA	P17612	TCMSP
chuanqiong	MOL000359	sitosterol	Muscarinic acetylcholine receptor M3	CHRM3	P20309	TCMSP
chuanqiong	MOL002135	Myricanone	Nitric oxide synthase, inducible	NOS2	P35228	TCMSP
chuanqiong	MOL002135	Myricanone	Nuclear receptor coactivator 1	NCOA1	Q15788	TCMSP
chuanqiong	MOL001494	Mandenol	Nuclear receptor coactivator 2	NCoA-2	Q15596	TCMSP
chuanqiong	MOL002157	wallichilide	Nuclear receptor coactivator 2	NCoA-2	Q15596	TCMSP
chuanqiong	MOL000359	sitosterol	Nuclear receptor coactivator 2	NCoA-2	Q15596	TCMSP
chuanqiong	MOL002135	Myricanone	Peroxisome proliferator activated receptor gamma	PPARG	P37231	TCMSP
chuanqiong	MOL000359	sitosterol	Phosphatidylinositol-4,5-bisphosphate 3-kinase catalytic subunit, gamma isoform	PIK3CG	P48736	TCMSP
chuanqiong	MOL002135	Myricanone	Potassium voltage-gated channel subfamily H member 2	KCNH2	Q12809	TCMSP
chuanqiong	MOL000359	sitosterol	Potassium voltage-gated channel subfamily H member 2	KCNH2	Q12809	TCMSP
chuanqiong	MOL000359	sitosterol	Progesterone receptor	PGR	P06401	TCMSP
chuanqiong	MOL001494	Mandenol	Prostaglandin G/H synthase 1	PTGS1	P23219	TCMSP
chuanqiong	MOL002135	Myricanone	Prostaglandin G/H synthase 1	PTGS1	P23219	TCMSP
chuanqiong	MOL000359	sitosterol	Prostaglandin G/H synthase 1	PTGS1	P23219	TCMSP
chuanqiong	MOL001494	Mandenol	Prostaglandin G/H synthase 2	PTGS2	P35354	TCMSP
chuanqiong	MOL002135	Myricanone	Prostaglandin G/H synthase 2	PTGS2	P35354	TCMSP
chuanqiong	MOL002140	Perlolyrine	Prostaglandin G/H synthase 2	PTGS2	P35354	TCMSP
chuanqiong	MOL002157	wallichilide	Prostaglandin G/H synthase 2	PTGS2	P35354	TCMSP
chuanqiong	MOL000359	sitosterol	Prostaglandin G/H synthase 2	PTGS2	P35354	TCMSP
chuanqiong	MOL002135	Myricanone	Proto-oncogene serine/threonine-protein kinase Pim-1	PIM1	P11309	TCMSP
chuanqiong	MOL002135	Myricanone	Retinoic acid receptor RXR-alpha	RXRA	P19793	TCMSP
chuanqiong	MOL002140	Perlolyrine	Retinoic acid receptor RXR-alpha	RXRA	P19793	TCMSP
chuanqiong	MOL002135	Myricanone	Serine/threonine-protein kinase Chk1	CHEK1	O14757	TCMSP
chuanqiong	MOL002135	Myricanone	Sodium channel protein type 5 subunit alpha	SCN5A	Q14524	TCMSP
ciwujia	MOL001558	Sesamin	5-hydroxytryptamine 2A receptor	HTR2A	P28223	TCMSP
ciwujia	MOL001558	Sesamin	Acetyl-CoA carboxylase 1	PRKAA1	Q13131	TCMSP
ciwujia	MOL000296	hederagenin	Alpha-1B adrenergic receptor	ADRA1B	P35368	TCMSP
ciwujia	MOL000519	coniferin	Alpha-1B adrenergic receptor	ADRA1B	P35368	TCMSP
ciwujia	MOL000519	coniferin	Alpha-1D adrenergic receptor	ADRA1D	P25100	TCMSP
ciwujia	MOL000519	coniferin	Androgen receptor	AR	P10275	TCMSP
ciwujia	MOL001558	Sesamin	ATP-citrate synthase	ACLY	P53396	TCMSP
ciwujia	MOL000519	coniferin	Beta-2 adrenergic receptor	ADRB2	P07550	TCMSP
ciwujia	MOL000519	coniferin	Beta-lactamase	LACTB2	Q53H82	TCMSP
ciwujia	MOL000519	coniferin	Carbonic anhydrase II	CA II	Q6LD99	TCMSP
ciwujia	MOL000519	coniferin	Cell division protein kinase 2	CDK2	P24941	TCMSP
ciwujia	MOL000296	hederagenin	CGMP-inhibited 3',5'-cyclic phosphodiesterase A	PDE3A	Q14432	TCMSP
ciwujia	MOL000519	coniferin	CGMP-inhibited 3',5'-cyclic phosphodiesterase A	PDE3A	Q14432	TCMSP
ciwujia	MOL001558	Sesamin	Coagulation factor Xa	F9	P00740	TCMSP
ciwujia	MOL000519	coniferin	Cyclin-A2	CCNA2	P20248	TCMSP
ciwujia	MOL001558	Sesamin	Cytochrome P450 2B6	CYP2B6	P20813	TCMSP
ciwujia	MOL000953	Cholesterol (JP15/NF)	Cytochrome P450-cam	CYP55A1	P23295	TCMSP
ciwujia	MOL000296	hederagenin	Cytochrome P450-cam	CYP55A1	P23295	TCMSP
ciwujia	MOL000519	coniferin	DNA topoisomerase II	TOP2B	Q02880	TCMSP
ciwujia	MOL001558	Sesamin	Endothelin-converting enzyme 1	ECE1	P42892	TCMSP
ciwujia	MOL000519	coniferin	Estrogen receptor	ESR1	P03372	TCMSP
ciwujia	MOL001558	Sesamin	Fatty acid synthase	FASN	P49327	TCMSP
ciwujia	MOL001558	Sesamin	G1/S-specific cyclin-D1	CCND1	P24385	TCMSP
ciwujia	MOL000296	hederagenin	Gamma-aminobutyric acid receptor subunit alpha-1	GABRA1	P14867	TCMSP
ciwujia	MOL000296	hederagenin	Gamma-aminobutyric-acid receptor alpha-2 subunit	GABRA2	P47869	TCMSP
ciwujia	MOL000296	hederagenin	Gamma-aminobutyric-acid receptor alpha-3 subunit	GABRA2	P47869	TCMSP
ciwujia	MOL001558	Sesamin	Glucose-6-phosphate 1-dehydrogenase	G6PD	P11413	TCMSP
ciwujia	MOL000296	hederagenin	Glutamate receptor 2	GRIA2	P42262	TCMSP
ciwujia	MOL000519	coniferin	Ig gamma-1 chain C region	IGHG1	P01857	TCMSP
ciwujia	MOL001558	Sesamin	Interleukin-10	IL10	P22301	TCMSP
ciwujia	MOL001558	Sesamin	Medium-chain specific acyl-CoA dehydrogenase, mitochondrial	ACADM	P11310	TCMSP
ciwujia	MOL001558	Sesamin	Methylglutaconyl-CoA hydratase, mitochondrial	AUH	Q13825	TCMSP
ciwujia	MOL000953	Cholesterol (JP15/NF)	Mineralocorticoid receptor	NR3C2	P08235	TCMSP
ciwujia	MOL000296	hederagenin	Muscarinic acetylcholine receptor M1	CHRM1	P11229	TCMSP
ciwujia	MOL000519	coniferin	Muscarinic acetylcholine receptor M1	CHRM1	P11229	TCMSP
ciwujia	MOL000296	hederagenin	Muscarinic acetylcholine receptor M2	CHRM2	P08172	TCMSP
ciwujia	MOL000296	hederagenin	Muscarinic acetylcholine receptor M3	CHRM3	P20309	TCMSP
ciwujia	MOL000519	coniferin	Muscarinic acetylcholine receptor M3	CHRM3	P20309	TCMSP
ciwujia	MOL000519	coniferin	Mu-type opioid receptor	OPRM1	P35372	TCMSP
ciwujia	MOL001558	Sesamin	NADPH oxidase 1	NOX1	Q9Y5S8	TCMSP
ciwujia	MOL001558	Sesamin	NADPH oxidase 3	NOX3	Q9HBY0	TCMSP
ciwujia	MOL000519	coniferin	Neuronal acetylcholine receptor protein, alpha-7 chain	CHRNA7	P36544	TCMSP
ciwujia	MOL001558	Sesamin	Nitric oxide synthase, endothelial	NOS3	P29474	TCMSP
ciwujia	MOL000519	coniferin	Nuclear receptor coactivator 1	NCOA1	Q15788	TCMSP
ciwujia	MOL000953	Cholesterol (JP15/NF)	Nuclear receptor coactivator 2	NCoA-2	Q15596	TCMSP
ciwujia	MOL001525	Daucosterol	Nuclear receptor coactivator 2	NCoA-2	Q15596	TCMSP
ciwujia	MOL000296	hederagenin	Nuclear receptor coactivator 2	NCoA-2	Q15596	TCMSP
ciwujia	MOL000519	coniferin	Nuclear receptor coactivator 2	NCoA-2	Q15596	TCMSP
ciwujia	MOL002875	Methyl oleate	Nuclear receptor coactivator 2	NCoA-2	Q15596	TCMSP
ciwujia	MOL001558	Sesamin	Peroxisomal acyl-coenzyme A oxidase 1	ACOX1	Q15067	TCMSP
ciwujia	MOL001558	Sesamin	Peroxisomal bifunctional enzyme	EHHADH	Q08426	TCMSP
ciwujia	MOL000519	coniferin	Peroxisome proliferator activated receptor gamma	PPARG	P37231	TCMSP
ciwujia	MOL000953	Cholesterol (JP15/NF)	Progesterone receptor	PGR	P06401	TCMSP
ciwujia	MOL001525	Daucosterol	Progesterone receptor	PGR	P06401	TCMSP
ciwujia	MOL000296	hederagenin	Progesterone receptor	PGR	P06401	TCMSP
ciwujia	MOL008599	Ethyl oleate	Prostaglandin G/H synthase 1	PTGS1	P23219	TCMSP
ciwujia	MOL001558	Sesamin	Prostaglandin G/H synthase 2	PTGS2	P35354	TCMSP
ciwujia	MOL000519	coniferin	Prostaglandin G/H synthase 2	PTGS2	P35354	TCMSP
ciwujia	MOL000519	coniferin	Proto-oncogene serine/threonine-protein kinase Pim-1	PIM1	P11309	TCMSP
ciwujia	MOL000296	hederagenin	Retinoic acid receptor RXR-alpha	RXRA	P19793	TCMSP
ciwujia	MOL002875	Methyl oleate	Retinoic acid receptor RXR-alpha	RXRA	P19793	TCMSP
ciwujia	MOL001558	Sesamin	Sodium channel protein type 5 subunit alpha	SCN5A	Q14524	TCMSP
ciwujia	MOL000519	coniferin	Sodium channel protein type 5 subunit alpha	SCN5A	Q14524	TCMSP
ciwujia	MOL000296	hederagenin	Sodium-dependent noradrenaline transporter	SLC6A2	P23975	TCMSP
ciwujia	MOL001558	Sesamin	Sterol regulatory element-binding protein 1	SLC2A4	P14672	TCMSP
hanfangji	MOL002341	Hesperetin	Calmodulin	CALM1	P0DP23	TCMSP
hanfangji	MOL000358	beta-sitosterol	Dopamine D1 receptor	DRD1	P21728	TCMSP
hanfangji	MOL002341	Hesperetin	Heat shock protein HSP 90	HSP 90	P08238	TCMSP
hanfangji	MOL000358	beta-sitosterol	Heat shock protein HSP 90	HSP 90	P08238	TCMSP
hanfangji	MOL002341	Hesperetin	mRNA of PKA Catalytic Subunit C-alpha	PRKACA	P17612	TCMSP
hanfangji	MOL000358	beta-sitosterol	mRNA of PKA Catalytic Subunit C-alpha	PRKACA	P17612	TCMSP
hanfangji	MOL000358	beta-sitosterol	Muscarinic acetylcholine receptor M3	CHRM3	P20309	TCMSP
hanfangji	MOL002341	Hesperetin	Nuclear receptor coactivator 1	NCOA1	Q15788	TCMSP
hanfangji	MOL002341	Hesperetin	Nuclear receptor coactivator 2	NCoA-2	Q15596	TCMSP
hanfangji	MOL000358	beta-sitosterol	Nuclear receptor coactivator 2	NCoA-2	Q15596	TCMSP
hanfangji	MOL002341	Hesperetin	Phosphatidylinositol-4,5-bisphosphate 3-kinase catalytic subunit, gamma isoform	PIK3CG	P48736	TCMSP
hanfangji	MOL000358	beta-sitosterol	Phosphatidylinositol-4,5-bisphosphate 3-kinase catalytic subunit, gamma isoform	PIK3CG	P48736	TCMSP
hanfangji	MOL000358	beta-sitosterol	Potassium voltage-gated channel subfamily H member 2	KCNH2	Q12809	TCMSP
hanfangji	MOL000358	beta-sitosterol	Progesterone receptor	PGR	P06401	TCMSP
hanfangji	MOL002341	Hesperetin	Prostaglandin G/H synthase 1	PTGS1	P23219	TCMSP
hanfangji	MOL000358	beta-sitosterol	Prostaglandin G/H synthase 1	PTGS1	P23219	TCMSP
hanfangji	MOL002341	Hesperetin	Prostaglandin G/H synthase 2	PTGS2	P35354	TCMSP
hanfangji	MOL000358	beta-sitosterol	Prostaglandin G/H synthase 2	PTGS2	P35354	TCMSP
hanfangji	MOL002341	Hesperetin	Sodium channel protein type 5 subunit alpha	SCN5A	Q14524	TCMSP
hebaicao	MOL000098	quercetin	3 beta-hydroxysteroid dehydrogenase/Delta 5-->4-isomerase type 2	HSD3B2	P26439	TCMSP
hebaicao	MOL000422	kaempferol	3,2-trans-enoyl-CoA isomerase, mitochondrial	ECI1	P42126	TCMSP
hebaicao	MOL000098	quercetin	72 kDa type IV collagenase	MMP2	P08253	TCMSP
hebaicao	MOL000098	quercetin	78 kDa glucose-regulated protein	HSPA5	P11021	TCMSP
hebaicao	MOL000098	quercetin	Acetylcholinesterase	ACHE	P22303	TCMSP
hebaicao	MOL000422	kaempferol	Acetylcholinesterase	ACHE	P22303	TCMSP
hebaicao	MOL000098	quercetin	Acetyl-CoA carboxylase 1	PRKAA1	Q13131	TCMSP
hebaicao	MOL000098	quercetin	Activator of 90 kDa heat shock protein ATPase homolog 1	AHSA1	O95433	TCMSP
hebaicao	MOL000422	kaempferol	Activator of 90 kDa heat shock protein ATPase homolog 1	AHSA1	O95433	TCMSP
hebaicao	MOL000422	kaempferol	Aldo-keto reductase family 1 member C3	AKR1C3	P42330	TCMSP
hebaicao	MOL000098	quercetin	Aldose reductase	P15121	AKR1B1	TCMSP
hebaicao	MOL000422	kaempferol	Alpha-1B adrenergic receptor	ADRA1B	P35368	TCMSP
hebaicao	MOL000098	quercetin	Amine oxidase [flavin-containing] B	MAOB	P27338	TCMSP
hebaicao	MOL000098	quercetin	Androgen receptor	AR	P10275	TCMSP
hebaicao	MOL000422	kaempferol	Androgen receptor	AR	P10275	TCMSP
hebaicao	MOL000422	kaempferol	Antileukoproteinase	SLPI	P03973	TCMSP
hebaicao	MOL000098	quercetin	Apoptosis regulator BAX	BAX	Q07812	TCMSP
hebaicao	MOL000422	kaempferol	Apoptosis regulator BAX	BAX	Q07812	TCMSP
hebaicao	MOL000098	quercetin	Apoptosis regulator Bcl-2	P10415	BCL2	TCMSP
hebaicao	MOL000422	kaempferol	Apoptosis regulator Bcl-2	P10415	BCL2	TCMSP
hebaicao	MOL000098	quercetin	Arachidonate 5-lipoxygenase	P09917	ALOX5	TCMSP
hebaicao	MOL000422	kaempferol	Arachidonate 5-lipoxygenase	P09917	ALOX5	TCMSP
hebaicao	MOL000098	quercetin	Aryl hydrocarbon receptor	P35869	AHR	TCMSP
hebaicao	MOL000422	kaempferol	Aryl hydrocarbon receptor	P35869	AHR	TCMSP
hebaicao	MOL000098	quercetin	ATP-binding cassette sub-family G member 2	Q9UNQ0	ABCG2	TCMSP
hebaicao	MOL000098	quercetin	Baculoviral IAP repeat-containing protein 5	BIRC5	O15392	TCMSP
hebaicao	MOL000098	quercetin	Bcl-2-like protein 1	BCL2L1	Q07817	TCMSP
hebaicao	MOL000098	quercetin	Beta-2 adrenergic receptor	ADRB2	P07550	TCMSP
hebaicao	MOL000422	kaempferol	Calmodulin	CALM1	P0DP23	TCMSP
hebaicao	MOL000098	quercetin	Caspase-3	CASP3	P42574	TCMSP
hebaicao	MOL000422	kaempferol	Caspase-3	CASP3	P42574	TCMSP
hebaicao	MOL000098	quercetin	Caspase-8	CASP8	Q14790	TCMSP
hebaicao	MOL000098	quercetin	Caspase-9	CASP9	P55211	TCMSP
hebaicao	MOL000098	quercetin	Cathepsin D	CTSD	P07339	TCMSP
hebaicao	MOL000098	quercetin	Caveolin-1	CAV1	Q03135	TCMSP
hebaicao	MOL000098	quercetin	C-C motif chemokine 2	CCL2	P13500	TCMSP
hebaicao	MOL000098	quercetin	CD40 ligand	CD40LG	P29965	TCMSP
hebaicao	MOL000098	quercetin	Cell division control protein 2 homolog	CDK1	P06493	TCMSP
hebaicao	MOL000422	kaempferol	Cell division control protein 2 homolog	CDK1	P06493	TCMSP
hebaicao	MOL000098	quercetin	Cellular tumor antigen p53	TP53	P04637	TCMSP
hebaicao	MOL000098	quercetin	Claudin-4	CLDN4	O14493	TCMSP
hebaicao	MOL000098	quercetin	Coagulation factor VII	F7	P08709	TCMSP
hebaicao	MOL000422	kaempferol	Coagulation factor VII	F7	P08709	TCMSP
hebaicao	MOL000098	quercetin	Coagulation factor Xa	F9	P00740	TCMSP
hebaicao	MOL000098	quercetin	Collagen alpha-1(I) chain	COL1A1	P02452	TCMSP
hebaicao	MOL000098	quercetin	Collagen alpha-1(III) chain	COL3A1	P02461	TCMSP
hebaicao	MOL000098	quercetin	C-reactive protein	CRP	P02741	TCMSP
hebaicao	MOL000098	quercetin	C-X-C motif chemokine 10	CXCL10	P02778	TCMSP
hebaicao	MOL000098	quercetin	C-X-C motif chemokine 11	CXCL10	P02778	TCMSP
hebaicao	MOL000098	quercetin	C-X-C motif chemokine 2	CXCL10	P02778	TCMSP
hebaicao	MOL000098	quercetin	Cyclin-dependent kinase inhibitor 1	CDKN1A	P38936	TCMSP
hebaicao	MOL000098	quercetin	Cyclin-dependent kinase inhibitor 2A, isoforms 1/2/3	CDKN1A	P38936	TCMSP
hebaicao	MOL000098	quercetin	Cytochrome P450 1A1	CYP1A1	P04798	TCMSP
hebaicao	MOL000422	kaempferol	Cytochrome P450 1A1	CYP1A1	P04798	TCMSP
hebaicao	MOL000098	quercetin	Cytochrome P450 1A2	CYP1A2	P05177	TCMSP
hebaicao	MOL000422	kaempferol	Cytochrome P450 1A2	CYP1A2	P05177	TCMSP
hebaicao	MOL000098	quercetin	Cytochrome P450 1B1	CYP1B1	Q16678	TCMSP
hebaicao	MOL000422	kaempferol	Cytochrome P450 1B1	CYP1B1	Q16678	TCMSP
hebaicao	MOL000098	quercetin	Cytochrome P450 3A4	CYP3A4	P08684	TCMSP
hebaicao	MOL000422	kaempferol	Cytochrome P450 3A4	CYP3A4	P08684	TCMSP
hebaicao	MOL000098	quercetin	DDB1- and CUL4-associated factor 5	DCAF5	Q96JK2	TCMSP
hebaicao	MOL000098	quercetin	Dipeptidyl peptidase IV	DPP4	P27487	TCMSP
hebaicao	MOL000422	kaempferol	Dipeptidyl peptidase IV	DPP4	P27487	TCMSP
hebaicao	MOL000098	quercetin	DNA gyrase subunit B	TOP2A	P11388	TCMSP
hebaicao	MOL000098	quercetin	DNA topoisomerase 1	TOP1	P11387	TCMSP
hebaicao	MOL000098	quercetin	DNA topoisomerase 2-alpha	TOP1MT	Q969P6	TCMSP
hebaicao	MOL000098	quercetin	DNA topoisomerase II	TOP2B	Q02880	TCMSP
hebaicao	MOL000422	kaempferol	DNA topoisomerase II	TOP2B	Q02880	TCMSP
hebaicao	MOL000098	quercetin	Dual oxidase 2	DUOX2	Q9NRD8	TCMSP
hebaicao	MOL000098	quercetin	Epidermal growth factor receptor	GRB7	Q14451	TCMSP
hebaicao	MOL000098	quercetin	E-selectin	SELE	P16581	TCMSP
hebaicao	MOL000422	kaempferol	E-selectin	SELE	P16581	TCMSP
hebaicao	MOL000098	quercetin	Estrogen sulfotransferase	SULT1E1	P49888	TCMSP
hebaicao	MOL000098	quercetin	ETS domain-containing protein Elk-1	ELK1	P19419	TCMSP
hebaicao	MOL000098	quercetin	Eukaryotic translation initiation factor 6	EIF6	P56537	TCMSP
hebaicao	MOL000098	quercetin	G1/S-specific cyclin-D1	CCND1	P24385	TCMSP
hebaicao	MOL000098	quercetin	G2/mitotic-specific cyclin-B1	CCNB1	P14635	TCMSP
hebaicao	MOL000098	quercetin	Gamma-aminobutyric acid receptor subunit alpha-1	GABRA1	P14867	TCMSP
hebaicao	MOL000422	kaempferol	Gamma-aminobutyric acid receptor subunit alpha-1	GABRA1	P14867	TCMSP
hebaicao	MOL000422	kaempferol	Gamma-aminobutyric-acid receptor alpha-2 subunit	GABRA2	P47869	TCMSP
hebaicao	MOL000098	quercetin	Gap junction alpha-1 protein	GJA1	P17302	TCMSP
hebaicao	MOL000098	quercetin	Glutathione S-transferase Mu 1	GSTM1	P09488	TCMSP
hebaicao	MOL000422	kaempferol	Glutathione S-transferase Mu 1	GSTM1	P09488	TCMSP
hebaicao	MOL000098	quercetin	Glutathione S-transferase Mu 2	GSTM2	P28161	TCMSP
hebaicao	MOL000422	kaempferol	Glutathione S-transferase Mu 2	GSTM2	P28161	TCMSP
hebaicao	MOL000098	quercetin	Glutathione S-transferase P	GSTP1	P09211	TCMSP
hebaicao	MOL000422	kaempferol	Glutathione S-transferase P	GSTP1	P09211	TCMSP
hebaicao	MOL000098	quercetin	Heat shock factor protein 1	HSF1	Q00613	TCMSP
hebaicao	MOL000098	quercetin	Heat shock protein beta-1	HSPB1	P04792	TCMSP
hebaicao	MOL000098	quercetin	Heat shock protein HSP 90	HSP 90	P08238	TCMSP
hebaicao	MOL000422	kaempferol	Heat shock protein HSP 90	HSP 90	P08238	TCMSP
hebaicao	MOL000098	quercetin	Heme oxygenase 1	HMOX1	P09601	TCMSP
hebaicao	MOL000422	kaempferol	Heme oxygenase 1	HMOX1	P09601	TCMSP
hebaicao	MOL000098	quercetin	Hexokinase-2	HK2	P52789	TCMSP
hebaicao	MOL000098	quercetin	Homeobox protein Nkx-3.1	NKX3-1	Q99801	TCMSP
hebaicao	MOL000098	quercetin	Hyaluronan synthase 2	HAS2	Q92819	TCMSP
hebaicao	MOL000422	kaempferol	Hyaluronan synthase 2	HAS2	Q92819	TCMSP
hebaicao	MOL000098	quercetin	Hypoxia-inducible factor 1-alpha	HIF1A	Q16665	TCMSP
hebaicao	MOL000098	quercetin	Inhibitor of nuclear factor kappa-B kinase subunit alpha	CHUK	O15111	TCMSP
hebaicao	MOL000422	kaempferol	Inhibitor of nuclear factor kappa-B kinase subunit beta	CHUK	O15111	TCMSP
hebaicao	MOL000098	quercetin	Insulin receptor	INSR	P06213	TCMSP
hebaicao	MOL000422	kaempferol	Insulin receptor	INSR	P06213	TCMSP
hebaicao	MOL000098	quercetin	Insulin-like growth factor II	IGF2	P01344	TCMSP
hebaicao	MOL000098	quercetin	Insulin-like growth factor-binding protein 3	IGFBP3	P17936	TCMSP
hebaicao	MOL000098	quercetin	Intercellular adhesion molecule 1	ICAM1	P05362	TCMSP
hebaicao	MOL000422	kaempferol	Intercellular adhesion molecule 1	ICAM1	P05362	TCMSP
hebaicao	MOL000098	quercetin	Interferon gamma	IFNG	P01579	TCMSP
hebaicao	MOL000098	quercetin	Interferon regulatory factor 1	IRF1	P10914	TCMSP
hebaicao	MOL000098	quercetin	Interleukin-1 alpha	IL1A	P01583	TCMSP
hebaicao	MOL000098	quercetin	Interleukin-1 beta	IL1A	P01583	TCMSP
hebaicao	MOL000098	quercetin	Interleukin-10	IL10	P22301	TCMSP
hebaicao	MOL000098	quercetin	Interleukin-2	IL2	P60568	TCMSP
hebaicao	MOL000098	quercetin	Interleukin-6	IL6	P05231	TCMSP
hebaicao	MOL000098	quercetin	Interleukin-8	CXCL8	P10145	TCMSP
hebaicao	MOL000098	quercetin	Interstitial collagenase	MMP1	P03956	TCMSP
hebaicao	MOL000422	kaempferol	Interstitial collagenase	MMP1	P03956	TCMSP
hebaicao	MOL000098	quercetin	Maltase-glucoamylase, intestinal	MGAM	O43451	TCMSP
hebaicao	MOL000098	quercetin	Matrix metalloproteinase-9	MMP9	P14780	TCMSP
hebaicao	MOL000098	quercetin	Mitogen-activated protein kinase 1	MAPK1	P28482	TCMSP
hebaicao	MOL000422	kaempferol	Mitogen-activated protein kinase 8	MAPK8	P45983	TCMSP
hebaicao	MOL000098	quercetin	mRNA of PKA Catalytic Subunit C-alpha	PRKACA	P17612	TCMSP
hebaicao	MOL000422	kaempferol	mRNA of PKA Catalytic Subunit C-alpha	PRKACA	P17612	TCMSP
hebaicao	MOL000422	kaempferol	Muscarinic acetylcholine receptor M1	CHRM1	P11229	TCMSP
hebaicao	MOL000422	kaempferol	Muscarinic acetylcholine receptor M2	CHRM2	P08172	TCMSP
hebaicao	MOL000098	quercetin	Myc proto-oncogene protein	MYC	P01106	TCMSP
hebaicao	MOL000098	quercetin	Myeloperoxidase	MPO	P05164	TCMSP
hebaicao	MOL000098	quercetin	NAD(P)H dehydrogenase [quinone] 1	NQO1	P15559	TCMSP
hebaicao	MOL000098	quercetin	NADPH--cytochrome P450 reductase	POR	P16435	TCMSP
hebaicao	MOL000098	quercetin	Neutrophil cytosol factor 1	NCF1	P14598	TCMSP
hebaicao	MOL000098	quercetin	NF-kappa-B inhibitor alpha	NFKBIA	P25963	TCMSP
hebaicao	MOL000098	quercetin	Nitric oxide synthase, endothelial	NOS3	P29474	TCMSP
hebaicao	MOL000422	kaempferol	Nitric oxide synthase, inducible	NOS2	P35228	TCMSP
hebaicao	MOL000098	quercetin	Nitric-oxide synthase, endothelial	NOS3	P29474	TCMSP
hebaicao	MOL000422	kaempferol	Nitric-oxide synthase, endothelial	NOS3	P29474	TCMSP
hebaicao	MOL000098	quercetin	Nuclear factor erythroid 2-related factor 2	NFE2L2	Q16236	TCMSP
hebaicao	MOL000098	quercetin	Nuclear receptor coactivator 2	NCoA-2	Q15596	TCMSP
hebaicao	MOL000422	kaempferol	Nuclear receptor coactivator 2	NCoA-2	Q15596	TCMSP
hebaicao	MOL000098	quercetin	Nuclear receptor subfamily 1 group I member 2	NR1I2	O75469	TCMSP
hebaicao	MOL000422	kaempferol	Nuclear receptor subfamily 1 group I member 2	NR1I2	O75469	TCMSP
hebaicao	MOL000098	quercetin	Nuclear receptor subfamily 1 group I member 3	NR1I3	Q14994	TCMSP
hebaicao	MOL000422	kaempferol	Nuclear receptor subfamily 1 group I member 3	NR1I3	Q14994	TCMSP
hebaicao	MOL000098	quercetin	Ornithine decarboxylase	ODC1	P11926	TCMSP
hebaicao	MOL000098	quercetin	Osteopontin	SPP1	P10451	TCMSP
hebaicao	MOL000098	quercetin	Peroxidase C1A	PRXC1A	P00433	TCMSP
hebaicao	MOL000422	kaempferol	Peroxidase C1A	PRXC1A	P00433	TCMSP
hebaicao	MOL000098	quercetin	Peroxisome proliferator activated receptor gamma	PPARG	P37231	TCMSP
hebaicao	MOL000422	kaempferol	Peroxisome proliferator activated receptor gamma	PPARG	P37231	TCMSP
hebaicao	MOL000098	quercetin	Peroxisome proliferator-activated receptor alpha	PPARA	Q07869	TCMSP
hebaicao	MOL000098	quercetin	Peroxisome proliferator-activated receptor delta	PPARD	Q03181	TCMSP
hebaicao	MOL000098	quercetin	Peroxisome proliferator-activated receptor gamma	PPARG	P37231	TCMSP
hebaicao	MOL000422	kaempferol	Peroxisome proliferator-activated receptor gamma	PPARG	P37231	TCMSP
hebaicao	MOL000098	quercetin	Phosphatidylinositol-3,4,5-trisphosphate 3-phosphatase and dual-specificity protein phosphatase PTEN	PTEN	P60484	TCMSP
hebaicao	MOL000098	quercetin	Phosphatidylinositol-4,5-bisphosphate 3-kinase catalytic subunit, gamma isoform	PIK3CG	P48736	TCMSP
hebaicao	MOL000422	kaempferol	Phosphatidylinositol-4,5-bisphosphate 3-kinase catalytic subunit, gamma isoform	PIK3CG	P48736	TCMSP
hebaicao	MOL000098	quercetin	Plasminogen activator inhibitor 1	SERPINE1	P05121	TCMSP
hebaicao	MOL000098	quercetin	Poly [ADP-ribose] polymerase 1	PARP1	P09874	TCMSP
hebaicao	MOL000098	quercetin	Potassium voltage-gated channel subfamily H member 2	KCNH2	Q12809	TCMSP
hebaicao	MOL000098	quercetin	Probable E3 ubiquitin-protein ligase HERC5	HERC5	Q9UII4	TCMSP
hebaicao	MOL000098	quercetin	Procollagen C-endopeptidase enhancer 1	PCOLCE	Q15113	TCMSP
hebaicao	MOL000098	quercetin	Pro-epidermal growth factor	EGF	P01133	TCMSP
hebaicao	MOL000422	kaempferol	Progesterone receptor	PGR	P06401	TCMSP
hebaicao	MOL000211	Mairin	Progesterone receptor	PGR	P06401	TCMSP
hebaicao	MOL000098	quercetin	Prostaglandin E2 receptor EP3 subtype	PTGER3	P43115	TCMSP
hebaicao	MOL000098	quercetin	Prostaglandin G/H synthase 1	PTGS1	P23219	TCMSP
hebaicao	MOL000422	kaempferol	Prostaglandin G/H synthase 1	PTGS1	P23219	TCMSP
hebaicao	MOL000098	quercetin	Prostaglandin G/H synthase 2	PTGS2	P35354	TCMSP
hebaicao	MOL000422	kaempferol	Prostaglandin G/H synthase 2	PTGS2	P35354	TCMSP
hebaicao	MOL000098	quercetin	Prostatic acid phosphatase	ACPP	P15309	TCMSP
hebaicao	MOL000098	quercetin	Protein CBFA2T1	RUNX1T1	Q06455	TCMSP
hebaicao	MOL000098	quercetin	Protein kinase C alpha type	PRKCD	Q05655	TCMSP
hebaicao	MOL000098	quercetin	Protein kinase C beta type	PRKCD	Q05655	TCMSP
hebaicao	MOL000098	quercetin	Proto-oncogene c-Fos	FOS	P01100	TCMSP
hebaicao	MOL000098	quercetin	Puromycin-sensitive aminopeptidase	NPEPPS	P55786	TCMSP
hebaicao	MOL000098	quercetin	RAC-alpha serine/threonine-protein kinase	AKT1	P31749	TCMSP
hebaicao	MOL000422	kaempferol	RAC-alpha serine/threonine-protein kinase	AKT1	P31749	TCMSP
hebaicao	MOL000098	quercetin	RAF proto-oncogene serine/threonine-protein kinase	RAF1	P04049	TCMSP
hebaicao	MOL000098	quercetin	Ras association domain-containing protein 1	RASSF1	Q9NS23	TCMSP
hebaicao	MOL000098	quercetin	Ras GTPase-activating protein 1	RASA1	P20936	TCMSP
hebaicao	MOL000098	quercetin	Receptor tyrosine-protein kinase erbB-2	ERBB2	P04626	TCMSP
hebaicao	MOL000098	quercetin	Receptor tyrosine-protein kinase erbB-3	ERBB3	P21860	TCMSP
hebaicao	MOL000098	quercetin	Retinoblastoma-associated protein	RB1	P06400	TCMSP
hebaicao	MOL000098	quercetin	Retinoic acid receptor RXR-alpha	RXRA	P19793	TCMSP
hebaicao	MOL000098	quercetin	Runt-related transcription factor 2	RUNX2	Q13950	TCMSP
hebaicao	MOL000098	quercetin	Serine/threonine-protein kinase Chk2	CHEK2	O96017	TCMSP
hebaicao	MOL000422	kaempferol	Serine/threonine-protein phosphatase 2B catalytic subunit alpha isoform	PPP3CA	Q08209	TCMSP
hebaicao	MOL000098	quercetin	Serum paraoxonase/arylesterase 1	PON1	P27169	TCMSP
hebaicao	MOL000098	quercetin	Signal transducer and activator of transcription 1-alpha/beta	STAT1	P42224	TCMSP
hebaicao	MOL000422	kaempferol	Signal transducer and activator of transcription 1-alpha/beta	STAT1	P42224	TCMSP
hebaicao	MOL000098	quercetin	Sodium channel protein type 5 subunit alpha	SCN5A	Q14524	TCMSP
hebaicao	MOL000422	kaempferol	Sodium-dependent noradrenaline transporter	SLC6A2	P23975	TCMSP
hebaicao	MOL000098	quercetin	Solute carrier family 2, facilitated glucose transporter member 4	SLC2A4	P14672	TCMSP
hebaicao	MOL000422	kaempferol	Solute carrier family 2, facilitated glucose transporter member 4	SLC2A4	P14672	TCMSP
hebaicao	MOL000098	quercetin	Stromelysin-1	MMP3	P08254	TCMSP
hebaicao	MOL000098	quercetin	Superoxide dismutase [Cu-Zn]	SOD1	P00441	TCMSP
huangqi	MOL000378	7-O-methylisomucronulatol	2,4-dienoyl-CoA reductase, mitochondrial	DECR1	Q16698	TCMSP
huangqi	MOL000392	formononetin	26S proteasome non-ATPase regulatory subunit 3	PSMD3	O43242	TCMSP
huangqi	MOL000422	kaempferol	26S proteasome non-ATPase regulatory subunit 3	PSMD3	O43242	TCMSP
huangqi	MOL000098	quercetin	26S proteasome non-ATPase regulatory subunit 3	PSMD3	O43242	TCMSP
huangqi	MOL000371	3,9-di-O-methylnissolin	5-hydroxytryptamine receptor 3A	HTR3A	P46098	TCMSP
huangqi	MOL000380	(6aR,11aR)-9,10-dimethoxy-6a,11a-dihydro-6H-benzofurano[3,2-c]chromen-3-ol	5-hydroxytryptamine receptor 3A	HTR3A	P46098	TCMSP
huangqi	MOL000098	quercetin	72 kDa type IV collagenase	MMP2	P08253	TCMSP
huangqi	MOL000098	quercetin	78 kDa glucose-regulated protein	HSPA5	P11021	TCMSP
huangqi	MOL000354	isorhamnetin	Acetylcholinesterase	ACHE	P22303	TCMSP
huangqi	MOL000371	3,9-di-O-methylnissolin	Acetylcholinesterase	ACHE	P22303	TCMSP
huangqi	MOL000380	(6aR,11aR)-9,10-dimethoxy-6a,11a-dihydro-6H-benzofurano[3,2-c]chromen-3-ol	Acetylcholinesterase	ACHE	P22303	TCMSP
huangqi	MOL000392	formononetin	Acetylcholinesterase	ACHE	P22303	TCMSP
huangqi	MOL000422	kaempferol	Acetylcholinesterase	ACHE	P22303	TCMSP
huangqi	MOL000098	quercetin	Acetylcholinesterase	ACHE	P22303	TCMSP
huangqi	MOL000098	quercetin	Acetyl-CoA carboxylase 1	PRKAA1	Q13131	TCMSP
huangqi	MOL000422	kaempferol	Activator of 90 kDa heat shock protein ATPase homolog 1	AHSA1	O95433	TCMSP
huangqi	MOL000098	quercetin	Activator of 90 kDa heat shock protein ATPase homolog 1	AHSA1	O95433	TCMSP
huangqi	MOL000296	hederagenin	Alcohol dehydrogenase 1B	ADH1B	P00325	TCMSP
huangqi	MOL000296	hederagenin	Alcohol dehydrogenase 1C	ADH1B	P00325	TCMSP
huangqi	MOL000422	kaempferol	Aldo-keto reductase family 1 member C3	AKR1C3	P42330	TCMSP
huangqi	MOL000354	isorhamnetin	Aldose reductase	P15121	AKR1B1	TCMSP
huangqi	MOL000098	quercetin	Aldose reductase	P15121	AKR1B1	TCMSP
huangqi	MOL000378	7-O-methylisomucronulatol	Alpha-1A adrenergic receptor	P35348	ADRA1A	TCMSP
huangqi	MOL000392	formononetin	Alpha-1A adrenergic receptor	P35348	ADRA1A	TCMSP
huangqi	MOL000296	hederagenin	Alpha-1B adrenergic receptor	ADRA1B	P35368	TCMSP
huangqi	MOL000371	3,9-di-O-methylnissolin	Alpha-1B adrenergic receptor	ADRA1B	P35368	TCMSP
huangqi	MOL000378	7-O-methylisomucronulatol	Alpha-1B adrenergic receptor	ADRA1B	P35368	TCMSP
huangqi	MOL000380	(6aR,11aR)-9,10-dimethoxy-6a,11a-dihydro-6H-benzofurano[3,2-c]chromen-3-ol	Alpha-1B adrenergic receptor	ADRA1B	P35368	TCMSP
huangqi	MOL000422	kaempferol	Alpha-1B adrenergic receptor	ADRA1B	P35368	TCMSP
huangqi	MOL000371	3,9-di-O-methylnissolin	Alpha-1D adrenergic receptor	ADRA1D	P25100	TCMSP
huangqi	MOL000378	7-O-methylisomucronulatol	Alpha-1D adrenergic receptor	ADRA1D	P25100	TCMSP
huangqi	MOL000380	(6aR,11aR)-9,10-dimethoxy-6a,11a-dihydro-6H-benzofurano[3,2-c]chromen-3-ol	Alpha-1D adrenergic receptor	ADRA1D	P25100	TCMSP
huangqi	MOL000371	3,9-di-O-methylnissolin	Alpha-2C adrenergic receptor	ADRA2C	P18825	TCMSP
huangqi	MOL000378	7-O-methylisomucronulatol	Alpha-2C adrenergic receptor	ADRA2C	P18825	TCMSP
huangqi	MOL000354	isorhamnetin	Amine oxidase [flavin-containing] B	MAOB	P27338	TCMSP
huangqi	MOL000392	formononetin	Amine oxidase [flavin-containing] B	MAOB	P27338	TCMSP
huangqi	MOL000098	quercetin	Amine oxidase [flavin-containing] B	MAOB	P27338	TCMSP
huangqi	MOL000239	Jaranol	Androgen receptor	AR	P10275	TCMSP
huangqi	MOL000354	isorhamnetin	Androgen receptor	AR	P10275	TCMSP
huangqi	MOL000378	7-O-methylisomucronulatol	Androgen receptor	AR	P10275	TCMSP
huangqi	MOL000392	formononetin	Androgen receptor	AR	P10275	TCMSP
huangqi	MOL000417	Calycosin	Androgen receptor	AR	P10275	TCMSP
huangqi	MOL000422	kaempferol	Androgen receptor	AR	P10275	TCMSP
huangqi	MOL000098	quercetin	Androgen receptor	AR	P10275	TCMSP
huangqi	MOL000422	kaempferol	Antileukoproteinase	SLPI	P03973	TCMSP
huangqi	MOL000422	kaempferol	Apoptosis regulator BAX	BAX	Q07812	TCMSP
huangqi	MOL000098	quercetin	Apoptosis regulator BAX	BAX	Q07812	TCMSP
huangqi	MOL000422	kaempferol	Apoptosis regulator Bcl-2	P10415	BCL2	TCMSP
huangqi	MOL000098	quercetin	Apoptosis regulator Bcl-2	P10415	BCL2	TCMSP
huangqi	MOL000422	kaempferol	Arachidonate 5-lipoxygenase	P09917	ALOX5	TCMSP
huangqi	MOL000098	quercetin	Arachidonate 5-lipoxygenase	P09917	ALOX5	TCMSP
huangqi	MOL000422	kaempferol	Aryl hydrocarbon receptor	P35869	AHR	TCMSP
huangqi	MOL000098	quercetin	Aryl hydrocarbon receptor	P35869	AHR	TCMSP
huangqi	MOL000392	formononetin	ATP synthase subunit beta, mitochondrial	ATP5F1B	P06576	TCMSP
huangqi	MOL000098	quercetin	ATP-binding cassette sub-family G member 2	Q9UNQ0	ABCG2	TCMSP
huangqi	MOL000098	quercetin	Baculoviral IAP repeat-containing protein 5	BIRC5	O15392	TCMSP
huangqi	MOL000098	quercetin	Bcl-2-like protein 1	BCL2L1	Q07817	TCMSP
huangqi	MOL000371	3,9-di-O-methylnissolin	Beta-1 adrenergic receptor	ADRB1	P08588	TCMSP
huangqi	MOL000378	7-O-methylisomucronulatol	Beta-1 adrenergic receptor	ADRB1	P08588	TCMSP
huangqi	MOL000371	3,9-di-O-methylnissolin	Beta-2 adrenergic receptor	ADRB2	P07550	TCMSP
huangqi	MOL000378	7-O-methylisomucronulatol	Beta-2 adrenergic receptor	ADRB2	P07550	TCMSP
huangqi	MOL000380	(6aR,11aR)-9,10-dimethoxy-6a,11a-dihydro-6H-benzofurano[3,2-c]chromen-3-ol	Beta-2 adrenergic receptor	ADRB2	P07550	TCMSP
huangqi	MOL000392	formononetin	Beta-2 adrenergic receptor	ADRB2	P07550	TCMSP
huangqi	MOL000417	Calycosin	Beta-2 adrenergic receptor	ADRB2	P07550	TCMSP
huangqi	MOL000098	quercetin	Beta-2 adrenergic receptor	ADRB2	P07550	TCMSP
huangqi	MOL000392	formononetin	Beta-lactamase	LACTB2	Q53H82	TCMSP
huangqi	MOL000378	7-O-methylisomucronulatol	Calcium-activated potassium channel subunit alpha 1	KCNMA1	Q12791	TCMSP
huangqi	MOL000387	Bifendate	Calcium-activated potassium channel subunit alpha 1	KCNMA1	Q12791	TCMSP
huangqi	MOL000239	Jaranol	Calmodulin	CALM1	P0DP23	TCMSP
huangqi	MOL000354	isorhamnetin	Calmodulin	CALM1	P0DP23	TCMSP
huangqi	MOL000371	3,9-di-O-methylnissolin	Calmodulin	CALM1	P0DP23	TCMSP
huangqi	MOL000378	7-O-methylisomucronulatol	Calmodulin	CALM1	P0DP23	TCMSP
huangqi	MOL000380	(6aR,11aR)-9,10-dimethoxy-6a,11a-dihydro-6H-benzofurano[3,2-c]chromen-3-ol	Calmodulin	CALM1	P0DP23	TCMSP
huangqi	MOL000392	formononetin	Calmodulin	CALM1	P0DP23	TCMSP
huangqi	MOL000417	Calycosin	Calmodulin	CALM1	P0DP23	TCMSP
huangqi	MOL000422	kaempferol	Calmodulin	CALM1	P0DP23	TCMSP
huangqi	MOL000392	formononetin	cAMP-dependent protein kinase inhibitor alpha	PKIA	P61925	TCMSP
huangqi	MOL000422	kaempferol	Caspase-3	CASP3	P42574	TCMSP
huangqi	MOL000098	quercetin	Caspase-3	CASP3	P42574	TCMSP
huangqi	MOL000098	quercetin	Caspase-8	CASP8	Q14790	TCMSP
huangqi	MOL000098	quercetin	Caspase-9	CASP9	P55211	TCMSP
huangqi	MOL000098	quercetin	Cathepsin D	CTSD	P07339	TCMSP
huangqi	MOL000098	quercetin	Caveolin-1	CAV1	Q03135	TCMSP
huangqi	MOL000098	quercetin	C-C motif chemokine 2	CCL2	P13500	TCMSP
huangqi	MOL000098	quercetin	CD40 ligand	CD40LG	P29965	TCMSP
huangqi	MOL000422	kaempferol	Cell division control protein 2 homolog	CDK1	P06493	TCMSP
huangqi	MOL000098	quercetin	Cell division control protein 2 homolog	CDK1	P06493	TCMSP
huangqi	MOL000239	Jaranol	Cell division protein kinase 2	CDK2	P24941	TCMSP
huangqi	MOL000354	isorhamnetin	Cell division protein kinase 2	CDK2	P24941	TCMSP
huangqi	MOL000378	7-O-methylisomucronulatol	Cell division protein kinase 2	CDK2	P24941	TCMSP
huangqi	MOL000392	formononetin	Cell division protein kinase 2	CDK2	P24941	TCMSP
huangqi	MOL000417	Calycosin	Cell division protein kinase 2	CDK2	P24941	TCMSP
huangqi	MOL000433	FA	Cell division protein kinase 2	CDK2	P24941	TCMSP
huangqi	MOL000098	quercetin	Cellular tumor antigen p53	TP53	P04637	TCMSP
huangqi	MOL000296	hederagenin	CGMP-inhibited 3',5'-cyclic phosphodiesterase A	PDE3A	Q14432	TCMSP
huangqi	MOL000371	3,9-di-O-methylnissolin	CGMP-inhibited 3',5'-cyclic phosphodiesterase A	PDE3A	Q14432	TCMSP
huangqi	MOL000378	7-O-methylisomucronulatol	CGMP-inhibited 3',5'-cyclic phosphodiesterase A	PDE3A	Q14432	TCMSP
huangqi	MOL000392	formononetin	CGMP-inhibited 3',5'-cyclic phosphodiesterase A	PDE3A	Q14432	TCMSP
huangqi	MOL000417	Calycosin	CGMP-inhibited 3',5'-cyclic phosphodiesterase A	PDE3A	Q14432	TCMSP
huangqi	MOL000098	quercetin	Claudin-4	CLDN4	O14493	TCMSP
huangqi	MOL000354	isorhamnetin	Coagulation factor VII	F7	P08709	TCMSP
huangqi	MOL000422	kaempferol	Coagulation factor VII	F7	P08709	TCMSP
huangqi	MOL000098	quercetin	Coagulation factor VII	F7	P08709	TCMSP
huangqi	MOL000378	7-O-methylisomucronulatol	Coagulation factor Xa	F9	P00740	TCMSP
huangqi	MOL000098	quercetin	Coagulation factor Xa	F9	P00740	TCMSP
huangqi	MOL000098	quercetin	Collagen alpha-1(I) chain	COL1A1	P02452	TCMSP
huangqi	MOL000098	quercetin	Collagen alpha-1(III) chain	COL3A1	P02461	TCMSP
huangqi	MOL000098	quercetin	C-reactive protein	CRP	P02741	TCMSP
huangqi	MOL000098	quercetin	C-X-C motif chemokine 10	CXCL10	P02778	TCMSP
huangqi	MOL000098	quercetin	C-X-C motif chemokine 11	CXCL10	P02778	TCMSP
huangqi	MOL000098	quercetin	C-X-C motif chemokine 2	CXCL10	P02778	TCMSP
huangqi	MOL000354	isorhamnetin	Cyclin-A2	CCNA2	P20248	TCMSP
huangqi	MOL000378	7-O-methylisomucronulatol	Cyclin-A2	CCNA2	P20248	TCMSP
huangqi	MOL000392	formononetin	Cyclin-A2	CCNA2	P20248	TCMSP
huangqi	MOL000417	Calycosin	Cyclin-A2	CCNA2	P20248	TCMSP
huangqi	MOL000098	quercetin	Cyclin-dependent kinase inhibitor 1	CDKN1A	P38936	TCMSP
huangqi	MOL000098	quercetin	Cyclin-dependent kinase inhibitor 2A, isoforms 1/2/3	CDKN1A	P38936	TCMSP
huangqi	MOL000422	kaempferol	Cytochrome P450 1A1	CYP1A1	P04798	TCMSP
huangqi	MOL000098	quercetin	Cytochrome P450 1A1	CYP1A1	P04798	TCMSP
huangqi	MOL000422	kaempferol	Cytochrome P450 1A2	CYP1A2	P05177	TCMSP
huangqi	MOL000098	quercetin	Cytochrome P450 1A2	CYP1A2	P05177	TCMSP
huangqi	MOL000422	kaempferol	Cytochrome P450 1B1	CYP1B1	Q16678	TCMSP
huangqi	MOL000098	quercetin	Cytochrome P450 1B1	CYP1B1	Q16678	TCMSP
huangqi	MOL000422	kaempferol	Cytochrome P450 3A4	CYP3A4	P08684	TCMSP
huangqi	MOL000098	quercetin	Cytochrome P450 3A4	CYP3A4	P08684	TCMSP
huangqi	MOL000296	hederagenin	Cytochrome P450-cam	CYP55A1	P23295	TCMSP
huangqi	MOL000354	isorhamnetin	Cytochrome P450-cam	CYP55A1	P23295	TCMSP
huangqi	MOL000098	quercetin	DDB1- and CUL4-associated factor 5	DCAF5	Q96JK2	TCMSP
huangqi	MOL000378	7-O-methylisomucronulatol	Delta-type opioid receptor	OPRD1	P41143	TCMSP
huangqi	MOL000239	Jaranol	Dipeptidyl peptidase IV	DPP4	P27487	TCMSP
huangqi	MOL000354	isorhamnetin	Dipeptidyl peptidase IV	DPP4	P27487	TCMSP
huangqi	MOL000378	7-O-methylisomucronulatol	Dipeptidyl peptidase IV	DPP4	P27487	TCMSP
huangqi	MOL000392	formononetin	Dipeptidyl peptidase IV	DPP4	P27487	TCMSP
huangqi	MOL000417	Calycosin	Dipeptidyl peptidase IV	DPP4	P27487	TCMSP
huangqi	MOL000422	kaempferol	Dipeptidyl peptidase IV	DPP4	P27487	TCMSP
huangqi	MOL000098	quercetin	Dipeptidyl peptidase IV	DPP4	P27487	TCMSP
huangqi	MOL000098	quercetin	DNA gyrase subunit B	TOP2A	P11388	TCMSP
huangqi	MOL000098	quercetin	DNA topoisomerase 1	TOP1	P11387	TCMSP
huangqi	MOL000098	quercetin	DNA topoisomerase 2-alpha	TOP1MT	Q969P6	TCMSP
huangqi	MOL000387	Bifendate	DNA topoisomerase II	TOP2B	Q02880	TCMSP
huangqi	MOL000422	kaempferol	DNA topoisomerase II	TOP2B	Q02880	TCMSP
huangqi	MOL000439	isomucronulatol-7,2'-di-O-glucosiole	DNA topoisomerase II	TOP2B	Q02880	TCMSP
huangqi	MOL000098	quercetin	DNA topoisomerase II	TOP2B	Q02880	TCMSP
huangqi	MOL000378	7-O-methylisomucronulatol	Dopamine D1 receptor	DRD1	P21728	TCMSP
huangqi	MOL000098	quercetin	Dual oxidase 2	DUOX2	Q9NRD8	TCMSP
huangqi	MOL000098	quercetin	Epidermal growth factor receptor	GRB7	Q14451	TCMSP
huangqi	MOL000422	kaempferol	E-selectin	SELE	P16581	TCMSP
huangqi	MOL000098	quercetin	E-selectin	SELE	P16581	TCMSP
huangqi	MOL000354	isorhamnetin	Estrogen receptor	ESR1	P03372	TCMSP
huangqi	MOL000371	3,9-di-O-methylnissolin	Estrogen receptor	ESR1	P03372	TCMSP
huangqi	MOL000378	7-O-methylisomucronulatol	Estrogen receptor	ESR1	P03372	TCMSP
huangqi	MOL000380	(6aR,11aR)-9,10-dimethoxy-6a,11a-dihydro-6H-benzofurano[3,2-c]chromen-3-ol	Estrogen receptor	ESR1	P03372	TCMSP
huangqi	MOL000392	formononetin	Estrogen receptor	ESR1	P03372	TCMSP
huangqi	MOL000417	Calycosin	Estrogen receptor	ESR1	P03372	TCMSP
huangqi	MOL000239	Jaranol	Estrogen receptor beta	ESR1	P03372	TCMSP
huangqi	MOL000354	isorhamnetin	Estrogen receptor beta	ESR1	P03372	TCMSP
huangqi	MOL000378	7-O-methylisomucronulatol	Estrogen receptor beta	ESR1	P03372	TCMSP
huangqi	MOL000392	formononetin	Estrogen receptor beta	ESR1	P03372	TCMSP
huangqi	MOL000417	Calycosin	Estrogen receptor beta	ESR1	P03372	TCMSP
huangqi	MOL000098	quercetin	Estrogen sulfotransferase	SULT1E1	P49888	TCMSP
huangqi	MOL000098	quercetin	ETS domain-containing protein Elk-1	ELK1	P19419	TCMSP
huangqi	MOL000098	quercetin	Eukaryotic translation initiation factor 6	EIF6	P56537	TCMSP
huangqi	MOL000098	quercetin	G1/S-specific cyclin-D1	CCND1	P24385	TCMSP
huangqi	MOL000098	quercetin	G2/mitotic-specific cyclin-B1	CCNB1	P14635	TCMSP
huangqi	MOL000296	hederagenin	Gamma-aminobutyric acid receptor subunit alpha-1	GABRA1	P14867	TCMSP
huangqi	MOL000354	isorhamnetin	Gamma-aminobutyric acid receptor subunit alpha-1	GABRA1	P14867	TCMSP
huangqi	MOL000371	3,9-di-O-methylnissolin	Gamma-aminobutyric acid receptor subunit alpha-1	GABRA1	P14867	TCMSP
huangqi	MOL000378	7-O-methylisomucronulatol	Gamma-aminobutyric acid receptor subunit alpha-1	GABRA1	P14867	TCMSP
huangqi	MOL000380	(6aR,11aR)-9,10-dimethoxy-6a,11a-dihydro-6H-benzofurano[3,2-c]chromen-3-ol	Gamma-aminobutyric acid receptor subunit alpha-1	GABRA1	P14867	TCMSP
huangqi	MOL000422	kaempferol	Gamma-aminobutyric acid receptor subunit alpha-1	GABRA1	P14867	TCMSP
huangqi	MOL000098	quercetin	Gamma-aminobutyric acid receptor subunit alpha-1	GABRA1	P14867	TCMSP
huangqi	MOL000296	hederagenin	Gamma-aminobutyric-acid receptor alpha-2 subunit	GABRA2	P47869	TCMSP
huangqi	MOL000422	kaempferol	Gamma-aminobutyric-acid receptor alpha-2 subunit	GABRA2	P47869	TCMSP
huangqi	MOL000296	hederagenin	Gamma-aminobutyric-acid receptor alpha-3 subunit	GABRA2	P47869	TCMSP
huangqi	MOL000296	hederagenin	Gamma-aminobutyric-acid receptor alpha-5 subunit	GABRA2	P47869	TCMSP
huangqi	MOL000296	hederagenin	Gamma-aminobutyric-acid receptor subunit alpha-6	GABRA2	P47869	TCMSP
huangqi	MOL000098	quercetin	Gap junction alpha-1 protein	GJA1	P17302	TCMSP
huangqi	MOL000296	hederagenin	Glutamate receptor 2	GRIA2	P42262	TCMSP
huangqi	MOL000354	isorhamnetin	Glutamate receptor 2	GRIA2	P42262	TCMSP
huangqi	MOL000422	kaempferol	Glutathione S-transferase Mu 1	GSTM1	P09488	TCMSP
huangqi	MOL000098	quercetin	Glutathione S-transferase Mu 1	GSTM1	P09488	TCMSP
huangqi	MOL000422	kaempferol	Glutathione S-transferase Mu 2	GSTM2	P28161	TCMSP
huangqi	MOL000098	quercetin	Glutathione S-transferase Mu 2	GSTM2	P28161	TCMSP
huangqi	MOL000422	kaempferol	Glutathione S-transferase P	GSTP1	P09211	TCMSP
huangqi	MOL000098	quercetin	Glutathione S-transferase P	GSTP1	P09211	TCMSP
huangqi	MOL000354	isorhamnetin	Glycogen phosphorylase, muscle form	PYGM	P11217	TCMSP
huangqi	MOL000354	isorhamnetin	Glycogen synthase kinase-3 beta	GSK3B	P49841	TCMSP
huangqi	MOL000378	7-O-methylisomucronulatol	Glycogen synthase kinase-3 beta	GSK3B	P49841	TCMSP
huangqi	MOL000392	formononetin	Glycogen synthase kinase-3 beta	GSK3B	P49841	TCMSP
huangqi	MOL000417	Calycosin	Glycogen synthase kinase-3 beta	GSK3B	P49841	TCMSP
huangqi	MOL000433	FA	Glycogen synthase kinase-3 beta	GSK3B	P49841	TCMSP
huangqi	MOL000098	quercetin	Heat shock factor protein 1	HSF1	Q00613	TCMSP
huangqi	MOL000098	quercetin	Heat shock protein beta-1	HSPB1	P04792	TCMSP
huangqi	MOL000239	Jaranol	Heat shock protein HSP 90	HSP 90	P08238	TCMSP
huangqi	MOL000354	isorhamnetin	Heat shock protein HSP 90	HSP 90	P08238	TCMSP
huangqi	MOL000378	7-O-methylisomucronulatol	Heat shock protein HSP 90	HSP 90	P08238	TCMSP
huangqi	MOL000380	(6aR,11aR)-9,10-dimethoxy-6a,11a-dihydro-6H-benzofurano[3,2-c]chromen-3-ol	Heat shock protein HSP 90	HSP 90	P08238	TCMSP
huangqi	MOL000387	Bifendate	Heat shock protein HSP 90	HSP 90	P08238	TCMSP
huangqi	MOL000392	formononetin	Heat shock protein HSP 90	HSP 90	P08238	TCMSP
huangqi	MOL000417	Calycosin	Heat shock protein HSP 90	HSP 90	P08238	TCMSP
huangqi	MOL000422	kaempferol	Heat shock protein HSP 90	HSP 90	P08238	TCMSP
huangqi	MOL000442	1,7-Dihydroxy-3,9-dimethoxy pterocarpene	Heat shock protein HSP 90	HSP 90	P08238	TCMSP
huangqi	MOL000098	quercetin	Heat shock protein HSP 90	HSP 90	P08238	TCMSP
huangqi	MOL000422	kaempferol	Heme oxygenase 1	HMOX1	P09601	TCMSP
huangqi	MOL000098	quercetin	Heme oxygenase 1	HMOX1	P09601	TCMSP
huangqi	MOL000387	Bifendate	Hepatocyte growth factor receptor	HGF	P14210	TCMSP
huangqi	MOL000098	quercetin	Hexokinase-2	HK2	P52789	TCMSP
huangqi	MOL000098	quercetin	Homeobox protein Nkx-3.1	NKX3-1	Q99801	TCMSP
huangqi	MOL000422	kaempferol	Hyaluronan synthase 2	HAS2	Q92819	TCMSP
huangqi	MOL000098	quercetin	Hyaluronan synthase 2	HAS2	Q92819	TCMSP
huangqi	MOL000098	quercetin	Hypoxia-inducible factor 1-alpha	HIF1A	Q16665	TCMSP
huangqi	MOL000296	hederagenin	Ig gamma-1 chain C region	IGHG1	P01857	TCMSP
huangqi	MOL000098	quercetin	Inhibitor of nuclear factor kappa-B kinase subunit alpha	CHUK	O15111	TCMSP
huangqi	MOL000422	kaempferol	Inhibitor of nuclear factor kappa-B kinase subunit beta	CHUK	O15111	TCMSP
huangqi	MOL000422	kaempferol	Insulin receptor	INSR	P06213	TCMSP
huangqi	MOL000098	quercetin	Insulin receptor	INSR	P06213	TCMSP
huangqi	MOL000098	quercetin	Insulin-like growth factor II	IGF2	P01344	TCMSP
huangqi	MOL000098	quercetin	Insulin-like growth factor-binding protein 3	IGFBP3	P17936	TCMSP
huangqi	MOL000422	kaempferol	Intercellular adhesion molecule 1	ICAM1	P05362	TCMSP
huangqi	MOL000098	quercetin	Intercellular adhesion molecule 1	ICAM1	P05362	TCMSP
huangqi	MOL000098	quercetin	Interferon gamma	IFNG	P01579	TCMSP
huangqi	MOL000098	quercetin	Interferon regulatory factor 1	IRF1	P10914	TCMSP
huangqi	MOL000098	quercetin	Interleukin-1 alpha	IL1A	P01583	TCMSP
huangqi	MOL000098	quercetin	Interleukin-1 beta	IL1A	P01583	TCMSP
huangqi	MOL000098	quercetin	Interleukin-10	IL10	P22301	TCMSP
huangqi	MOL000098	quercetin	Interleukin-2	IL2	P60568	TCMSP
huangqi	MOL000392	formononetin	Interleukin-4	IL4	P05112	TCMSP
huangqi	MOL000098	quercetin	Interleukin-6	IL6	P05231	TCMSP
huangqi	MOL000098	quercetin	Interleukin-8	CXCL8	P10145	TCMSP
huangqi	MOL000422	kaempferol	Interstitial collagenase	MMP1	P03956	TCMSP
huangqi	MOL000098	quercetin	Interstitial collagenase	MMP1	P03956	TCMSP
huangqi	MOL000296	hederagenin	Lysozyme	LYZ	P61626	TCMSP
huangqi	MOL000098	quercetin	Maltase-glucoamylase, intestinal	MGAM	O43451	TCMSP
huangqi	MOL000098	quercetin	Matrix metalloproteinase-9	MMP9	P14780	TCMSP
huangqi	MOL000098	quercetin	Mitogen-activated protein kinase 1	MAPK1	P28482	TCMSP
huangqi	MOL000354	isorhamnetin	Mitogen-activated protein kinase 14	MAPK14	Q16539	TCMSP
huangqi	MOL000378	7-O-methylisomucronulatol	Mitogen-activated protein kinase 14	MAPK14	Q16539	TCMSP
huangqi	MOL000392	formononetin	Mitogen-activated protein kinase 14	MAPK14	Q16539	TCMSP
huangqi	MOL000417	Calycosin	Mitogen-activated protein kinase 14	MAPK14	Q16539	TCMSP
huangqi	MOL000422	kaempferol	Mitogen-activated protein kinase 8	MAPK8	P45983	TCMSP
huangqi	MOL000354	isorhamnetin	mRNA of PKA Catalytic Subunit C-alpha	PRKACA	P17612	TCMSP
huangqi	MOL000378	7-O-methylisomucronulatol	mRNA of PKA Catalytic Subunit C-alpha	PRKACA	P17612	TCMSP
huangqi	MOL000392	formononetin	mRNA of PKA Catalytic Subunit C-alpha	PRKACA	P17612	TCMSP
huangqi	MOL000417	Calycosin	mRNA of PKA Catalytic Subunit C-alpha	PRKACA	P17612	TCMSP
huangqi	MOL000422	kaempferol	mRNA of PKA Catalytic Subunit C-alpha	PRKACA	P17612	TCMSP
huangqi	MOL000098	quercetin	mRNA of PKA Catalytic Subunit C-alpha	PRKACA	P17612	TCMSP
huangqi	MOL000354	isorhamnetin	mRNA of Protein-tyrosine phosphatase, non-receptor type 1	PTPN6	P29350	TCMSP
huangqi	MOL000296	hederagenin	Muscarinic acetylcholine receptor M1	CHRM1	P11229	TCMSP
huangqi	MOL000371	3,9-di-O-methylnissolin	Muscarinic acetylcholine receptor M1	CHRM1	P11229	TCMSP
huangqi	MOL000378	7-O-methylisomucronulatol	Muscarinic acetylcholine receptor M1	CHRM1	P11229	TCMSP
huangqi	MOL000380	(6aR,11aR)-9,10-dimethoxy-6a,11a-dihydro-6H-benzofurano[3,2-c]chromen-3-ol	Muscarinic acetylcholine receptor M1	CHRM1	P11229	TCMSP
huangqi	MOL000392	formononetin	Muscarinic acetylcholine receptor M1	CHRM1	P11229	TCMSP
huangqi	MOL000422	kaempferol	Muscarinic acetylcholine receptor M1	CHRM1	P11229	TCMSP
huangqi	MOL000296	hederagenin	Muscarinic acetylcholine receptor M2	CHRM2	P08172	TCMSP
huangqi	MOL000378	7-O-methylisomucronulatol	Muscarinic acetylcholine receptor M2	CHRM2	P08172	TCMSP
huangqi	MOL000422	kaempferol	Muscarinic acetylcholine receptor M2	CHRM2	P08172	TCMSP
huangqi	MOL000296	hederagenin	Muscarinic acetylcholine receptor M3	CHRM3	P20309	TCMSP
huangqi	MOL000371	3,9-di-O-methylnissolin	Muscarinic acetylcholine receptor M3	CHRM3	P20309	TCMSP
huangqi	MOL000378	7-O-methylisomucronulatol	Muscarinic acetylcholine receptor M3	CHRM3	P20309	TCMSP
huangqi	MOL000380	(6aR,11aR)-9,10-dimethoxy-6a,11a-dihydro-6H-benzofurano[3,2-c]chromen-3-ol	Muscarinic acetylcholine receptor M3	CHRM3	P20309	TCMSP
huangqi	MOL000378	7-O-methylisomucronulatol	Muscarinic acetylcholine receptor M4	CHRM4	P08173	TCMSP
huangqi	MOL000380	(6aR,11aR)-9,10-dimethoxy-6a,11a-dihydro-6H-benzofurano[3,2-c]chromen-3-ol	Muscarinic acetylcholine receptor M4	CHRM4	P08173	TCMSP
huangqi	MOL000378	7-O-methylisomucronulatol	Muscarinic acetylcholine receptor M5	CHRM5	P08912	TCMSP
huangqi	MOL000371	3,9-di-O-methylnissolin	Mu-type opioid receptor	OPRM1	P35372	TCMSP
huangqi	MOL000098	quercetin	Myc proto-oncogene protein	MYC	P01106	TCMSP
huangqi	MOL000098	quercetin	Myeloperoxidase	MPO	P05164	TCMSP
huangqi	MOL000098	quercetin	NAD(P)H dehydrogenase [quinone] 1	NQO1	P15559	TCMSP
huangqi	MOL000392	formononetin	NAD-dependent deacetylase sirtuin-1	SIRT1	Q96EB6	TCMSP
huangqi	MOL000392	formononetin	NADH-ubiquinone oxidoreductase chain 6	MT-ND6	P03923	TCMSP
huangqi	MOL000098	quercetin	NADPH--cytochrome P450 reductase	POR	P16435	TCMSP
huangqi	MOL000380	(6aR,11aR)-9,10-dimethoxy-6a,11a-dihydro-6H-benzofurano[3,2-c]chromen-3-ol	Neuronal acetylcholine receptor protein, alpha-7 chain	CHRNA7	P36544	TCMSP
huangqi	MOL000354	isorhamnetin	Neutrophil cytosol factor 1	NCF1	P14598	TCMSP
huangqi	MOL000098	quercetin	Neutrophil cytosol factor 1	NCF1	P14598	TCMSP
huangqi	MOL000098	quercetin	NF-kappa-B inhibitor alpha	NFKBIA	P25963	TCMSP
huangqi	MOL000098	quercetin	Nitric oxide synthase, endothelial	NOS3	P29474	TCMSP
huangqi	MOL000239	Jaranol	Nitric oxide synthase, inducible	NOS2	P35228	TCMSP
huangqi	MOL000354	isorhamnetin	Nitric oxide synthase, inducible	NOS2	P35228	TCMSP
huangqi	MOL000371	3,9-di-O-methylnissolin	Nitric oxide synthase, inducible	NOS2	P35228	TCMSP
huangqi	MOL000378	7-O-methylisomucronulatol	Nitric oxide synthase, inducible	NOS2	P35228	TCMSP
huangqi	MOL000380	(6aR,11aR)-9,10-dimethoxy-6a,11a-dihydro-6H-benzofurano[3,2-c]chromen-3-ol	Nitric oxide synthase, inducible	NOS2	P35228	TCMSP
huangqi	MOL000392	formononetin	Nitric oxide synthase, inducible	NOS2	P35228	TCMSP
huangqi	MOL000417	Calycosin	Nitric oxide synthase, inducible	NOS2	P35228	TCMSP
huangqi	MOL000422	kaempferol	Nitric oxide synthase, inducible	NOS2	P35228	TCMSP
huangqi	MOL000354	isorhamnetin	Nitric-oxide synthase, endothelial	NOS3	P29474	TCMSP
huangqi	MOL000371	3,9-di-O-methylnissolin	Nitric-oxide synthase, endothelial	NOS3	P29474	TCMSP
huangqi	MOL000378	7-O-methylisomucronulatol	Nitric-oxide synthase, endothelial	NOS3	P29474	TCMSP
huangqi	MOL000392	formononetin	Nitric-oxide synthase, endothelial	NOS3	P29474	TCMSP
huangqi	MOL000422	kaempferol	Nitric-oxide synthase, endothelial	NOS3	P29474	TCMSP
huangqi	MOL000098	quercetin	Nitric-oxide synthase, endothelial	NOS3	P29474	TCMSP
huangqi	MOL000098	quercetin	Nuclear factor erythroid 2-related factor 2	NFE2L2	Q16236	TCMSP
huangqi	MOL000354	isorhamnetin	Nuclear receptor coactivator 1	NCOA1	Q15788	TCMSP
huangqi	MOL000380	(6aR,11aR)-9,10-dimethoxy-6a,11a-dihydro-6H-benzofurano[3,2-c]chromen-3-ol	Nuclear receptor coactivator 1	NCOA1	Q15788	TCMSP
huangqi	MOL000239	Jaranol	Nuclear receptor coactivator 2	NCoA-2	Q15596	TCMSP
huangqi	MOL000296	hederagenin	Nuclear receptor coactivator 2	NCoA-2	Q15596	TCMSP
huangqi	MOL000354	isorhamnetin	Nuclear receptor coactivator 2	NCoA-2	Q15596	TCMSP
huangqi	MOL000371	3,9-di-O-methylnissolin	Nuclear receptor coactivator 2	NCoA-2	Q15596	TCMSP
huangqi	MOL000378	7-O-methylisomucronulatol	Nuclear receptor coactivator 2	NCoA-2	Q15596	TCMSP
huangqi	MOL000380	(6aR,11aR)-9,10-dimethoxy-6a,11a-dihydro-6H-benzofurano[3,2-c]chromen-3-ol	Nuclear receptor coactivator 2	NCoA-2	Q15596	TCMSP
huangqi	MOL000417	Calycosin	Nuclear receptor coactivator 2	NCoA-2	Q15596	TCMSP
huangqi	MOL000422	kaempferol	Nuclear receptor coactivator 2	NCoA-2	Q15596	TCMSP
huangqi	MOL000098	quercetin	Nuclear receptor coactivator 2	NCoA-2	Q15596	TCMSP
huangqi	MOL000422	kaempferol	Nuclear receptor subfamily 1 group I member 2	NR1I2	O75469	TCMSP
huangqi	MOL000098	quercetin	Nuclear receptor subfamily 1 group I member 2	NR1I2	O75469	TCMSP
huangqi	MOL000422	kaempferol	Nuclear receptor subfamily 1 group I member 3	NR1I3	Q14994	TCMSP
huangqi	MOL000098	quercetin	Nuclear receptor subfamily 1 group I member 3	NR1I3	Q14994	TCMSP
huangqi	MOL000098	quercetin	Ornithine decarboxylase	ODC1	P11926	TCMSP
huangqi	MOL000098	quercetin	Osteopontin	SPP1	P10451	TCMSP
huangqi	MOL000354	isorhamnetin	Oxidized low-density lipoprotein receptor 1	OLR1	P78380	TCMSP
huangqi	MOL000422	kaempferol	Peroxidase C1A	PRXC1A	P00433	TCMSP
huangqi	MOL000098	quercetin	Peroxidase C1A	PRXC1A	P00433	TCMSP
huangqi	MOL000354	isorhamnetin	Peroxisome proliferator activated receptor delta	PPARD	Q03181	TCMSP
huangqi	MOL000354	isorhamnetin	Peroxisome proliferator activated receptor gamma	PPARG	P37231	TCMSP
huangqi	MOL000378	7-O-methylisomucronulatol	Peroxisome proliferator activated receptor gamma	PPARG	P37231	TCMSP
huangqi	MOL000392	formononetin	Peroxisome proliferator activated receptor gamma	PPARG	P37231	TCMSP
huangqi	MOL000417	Calycosin	Peroxisome proliferator activated receptor gamma	PPARG	P37231	TCMSP
huangqi	MOL000422	kaempferol	Peroxisome proliferator activated receptor gamma	PPARG	P37231	TCMSP
huangqi	MOL000098	quercetin	Peroxisome proliferator activated receptor gamma	PPARG	P37231	TCMSP
huangqi	MOL000098	quercetin	Peroxisome proliferator-activated receptor alpha	PPARA	Q07869	TCMSP
huangqi	MOL000098	quercetin	Peroxisome proliferator-activated receptor delta	PPARD	Q03181	TCMSP
huangqi	MOL000392	formononetin	Peroxisome proliferator-activated receptor gamma	PPARG	P37231	TCMSP
huangqi	MOL000422	kaempferol	Peroxisome proliferator-activated receptor gamma	PPARG	P37231	TCMSP
huangqi	MOL000098	quercetin	Peroxisome proliferator-activated receptor gamma	PPARG	P37231	TCMSP
huangqi	MOL000098	quercetin	Phosphatidylinositol-3,4,5-trisphosphate 3-phosphatase and dual-specificity protein phosphatase PTEN	PTEN	P60484	TCMSP
huangqi	MOL000354	isorhamnetin	Phosphatidylinositol-4,5-bisphosphate 3-kinase catalytic subunit, gamma isoform	PIK3CG	P48736	TCMSP
huangqi	MOL000422	kaempferol	Phosphatidylinositol-4,5-bisphosphate 3-kinase catalytic subunit, gamma isoform	PIK3CG	P48736	TCMSP
huangqi	MOL000098	quercetin	Phosphatidylinositol-4,5-bisphosphate 3-kinase catalytic subunit, gamma isoform	PIK3CG	P48736	TCMSP
huangqi	MOL000098	quercetin	Plasminogen activator inhibitor 1	SERPINE1	P05121	TCMSP
huangqi	MOL000098	quercetin	Poly [ADP-ribose] polymerase 1	PARP1	P09874	TCMSP
huangqi	MOL000378	7-O-methylisomucronulatol	Potassium voltage-gated channel subfamily H member 2	KCNH2	Q12809	TCMSP
huangqi	MOL000098	quercetin	Potassium voltage-gated channel subfamily H member 2	KCNH2	Q12809	TCMSP
huangqi	MOL000098	quercetin	Probable E3 ubiquitin-protein ligase HERC5	HERC5	Q9UII4	TCMSP
huangqi	MOL000098	quercetin	Procollagen C-endopeptidase enhancer 1	PCOLCE	Q15113	TCMSP
huangqi	MOL000098	quercetin	Pro-epidermal growth factor	EGF	P01133	TCMSP
huangqi	MOL000211	Mairin	Progesterone receptor	PGR	P06401	TCMSP
huangqi	MOL000296	hederagenin	Progesterone receptor	PGR	P06401	TCMSP
huangqi	MOL000033	(3S,8S,9S,10R,13R,14S,17R)-10,13-dimethyl-17-[(2R,5S)-5-propan-2-yloctan-2-yl]-2,3,4,7,8,9,11,12,14,15,16,17-dodecahydro-1H-cyclopenta[a]phenanthren-3-ol	Progesterone receptor	PGR	P06401	TCMSP
huangqi	MOL000422	kaempferol	Progesterone receptor	PGR	P06401	TCMSP
huangqi	MOL000098	quercetin	Prostaglandin E2 receptor EP3 subtype	PTGER3	P43115	TCMSP
huangqi	MOL000239	Jaranol	Prostaglandin G/H synthase 1	PTGS1	P23219	TCMSP
huangqi	MOL000296	hederagenin	Prostaglandin G/H synthase 1	PTGS1	P23219	TCMSP
huangqi	MOL000354	isorhamnetin	Prostaglandin G/H synthase 1	PTGS1	P23219	TCMSP
huangqi	MOL000371	3,9-di-O-methylnissolin	Prostaglandin G/H synthase 1	PTGS1	P23219	TCMSP
huangqi	MOL000378	7-O-methylisomucronulatol	Prostaglandin G/H synthase 1	PTGS1	P23219	TCMSP
huangqi	MOL000380	(6aR,11aR)-9,10-dimethoxy-6a,11a-dihydro-6H-benzofurano[3,2-c]chromen-3-ol	Prostaglandin G/H synthase 1	PTGS1	P23219	TCMSP
huangqi	MOL000387	Bifendate	Prostaglandin G/H synthase 1	PTGS1	P23219	TCMSP
huangqi	MOL000392	formononetin	Prostaglandin G/H synthase 1	PTGS1	P23219	TCMSP
huangqi	MOL000417	Calycosin	Prostaglandin G/H synthase 1	PTGS1	P23219	TCMSP
huangqi	MOL000422	kaempferol	Prostaglandin G/H synthase 1	PTGS1	P23219	TCMSP
huangqi	MOL000098	quercetin	Prostaglandin G/H synthase 1	PTGS1	P23219	TCMSP
huangqi	MOL000239	Jaranol	Prostaglandin G/H synthase 2	PTGS2	P35354	TCMSP
huangqi	MOL000296	hederagenin	Prostaglandin G/H synthase 2	PTGS2	P35354	TCMSP
huangqi	MOL000354	isorhamnetin	Prostaglandin G/H synthase 2	PTGS2	P35354	TCMSP
huangqi	MOL000371	3,9-di-O-methylnissolin	Prostaglandin G/H synthase 2	PTGS2	P35354	TCMSP
huangqi	MOL000378	7-O-methylisomucronulatol	Prostaglandin G/H synthase 2	PTGS2	P35354	TCMSP
huangqi	MOL000380	(6aR,11aR)-9,10-dimethoxy-6a,11a-dihydro-6H-benzofurano[3,2-c]chromen-3-ol	Prostaglandin G/H synthase 2	PTGS2	P35354	TCMSP
huangqi	MOL000387	Bifendate	Prostaglandin G/H synthase 2	PTGS2	P35354	TCMSP
huangqi	MOL000392	formononetin	Prostaglandin G/H synthase 2	PTGS2	P35354	TCMSP
huangqi	MOL000417	Calycosin	Prostaglandin G/H synthase 2	PTGS2	P35354	TCMSP
huangqi	MOL000422	kaempferol	Prostaglandin G/H synthase 2	PTGS2	P35354	TCMSP
huangqi	MOL000442	1,7-Dihydroxy-3,9-dimethoxy pterocarpene	Prostaglandin G/H synthase 2	PTGS2	P35354	TCMSP
huangqi	MOL000098	quercetin	Prostaglandin G/H synthase 2	PTGS2	P35354	TCMSP
huangqi	MOL000098	quercetin	Prostatic acid phosphatase	ACPP	P15309	TCMSP
huangqi	MOL000098	quercetin	Protein CBFA2T1	RUNX1T1	Q06455	TCMSP
huangqi	MOL000098	quercetin	Protein kinase C alpha type	PRKCD	Q05655	TCMSP
huangqi	MOL000098	quercetin	Protein kinase C beta type	PRKCD	Q05655	TCMSP
huangqi	MOL000098	quercetin	Proto-oncogene c-Fos	FOS	P01100	TCMSP
huangqi	MOL000354	isorhamnetin	Proto-oncogene serine/threonine-protein kinase Pim-1	PIM1	P11309	TCMSP
huangqi	MOL000378	7-O-methylisomucronulatol	Proto-oncogene serine/threonine-protein kinase Pim-1	PIM1	P11309	TCMSP
huangqi	MOL000392	formononetin	Proto-oncogene serine/threonine-protein kinase Pim-1	PIM1	P11309	TCMSP
huangqi	MOL000417	Calycosin	Proto-oncogene serine/threonine-protein kinase Pim-1	PIM1	P11309	TCMSP
huangqi	MOL000098	quercetin	Puromycin-sensitive aminopeptidase	NPEPPS	P55786	TCMSP
huangqi	MOL000422	kaempferol	RAC-alpha serine/threonine-protein kinase	AKT1	P31749	TCMSP
huangqi	MOL000098	quercetin	RAC-alpha serine/threonine-protein kinase	AKT1	P31749	TCMSP
huangqi	MOL000098	quercetin	RAF proto-oncogene serine/threonine-protein kinase	RAF1	P04049	TCMSP
huangqi	MOL000098	quercetin	Ras association domain-containing protein 1	RASSF1	Q9NS23	TCMSP
huangqi	MOL000098	quercetin	Ras GTPase-activating protein 1	RASA1	P20936	TCMSP
huangqi	MOL000098	quercetin	Receptor tyrosine-protein kinase erbB-2	ERBB2	P04626	TCMSP
huangqi	MOL000098	quercetin	Receptor tyrosine-protein kinase erbB-3	ERBB3	P21860	TCMSP
huangqi	MOL000098	quercetin	Retinoblastoma-associated protein	RB1	P06400	TCMSP
huangqi	MOL000296	hederagenin	Retinoic acid receptor RXR-alpha	RXRA	P19793	TCMSP
huangqi	MOL000371	3,9-di-O-methylnissolin	Retinoic acid receptor RXR-alpha	RXRA	P19793	TCMSP
huangqi	MOL000378	7-O-methylisomucronulatol	Retinoic acid receptor RXR-alpha	RXRA	P19793	TCMSP
huangqi	MOL000380	(6aR,11aR)-9,10-dimethoxy-6a,11a-dihydro-6H-benzofurano[3,2-c]chromen-3-ol	Retinoic acid receptor RXR-alpha	RXRA	P19793	TCMSP
huangqi	MOL000392	formononetin	Retinoic acid receptor RXR-alpha	RXRA	P19793	TCMSP
huangqi	MOL000417	Calycosin	Retinoic acid receptor RXR-alpha	RXRA	P19793	TCMSP
huangqi	MOL000442	1,7-Dihydroxy-3,9-dimethoxy pterocarpene	Retinoic acid receptor RXR-alpha	RXRA	P19793	TCMSP
huangqi	MOL000098	quercetin	Retinoic acid receptor RXR-alpha	RXRA	P19793	TCMSP
huangqi	MOL000378	7-O-methylisomucronulatol	Retinoic acid receptor RXR-beta	RXRB	P28702	TCMSP
huangqi	MOL000098	quercetin	Runt-related transcription factor 2	RUNX2	Q13950	TCMSP
huangqi	MOL000239	Jaranol	Serine/threonine-protein kinase Chk1	CHEK1	O14757	TCMSP
huangqi	MOL000354	isorhamnetin	Serine/threonine-protein kinase Chk1	CHEK1	O14757	TCMSP
huangqi	MOL000378	7-O-methylisomucronulatol	Serine/threonine-protein kinase Chk1	CHEK1	O14757	TCMSP
huangqi	MOL000392	formononetin	Serine/threonine-protein kinase Chk1	CHEK1	O14757	TCMSP
huangqi	MOL000417	Calycosin	Serine/threonine-protein kinase Chk1	CHEK1	O14757	TCMSP
huangqi	MOL000098	quercetin	Serine/threonine-protein kinase Chk2	CHEK2	O96017	TCMSP
huangqi	MOL000422	kaempferol	Serine/threonine-protein phosphatase 2B catalytic subunit alpha isoform	PPP3CA	Q08209	TCMSP
huangqi	MOL000098	quercetin	Serum paraoxonase/arylesterase 1	PON1	P27169	TCMSP
huangqi	MOL000422	kaempferol	Signal transducer and activator of transcription 1-alpha/beta	STAT1	P42224	TCMSP
huangqi	MOL000098	quercetin	Signal transducer and activator of transcription 1-alpha/beta	STAT1	P42224	TCMSP
huangqi	MOL000239	Jaranol	Sodium channel protein type 5 subunit alpha	SCN5A	Q14524	TCMSP
huangqi	MOL000296	hederagenin	Sodium channel protein type 5 subunit alpha	SCN5A	Q14524	TCMSP
huangqi	MOL000371	3,9-di-O-methylnissolin	Sodium channel protein type 5 subunit alpha	SCN5A	Q14524	TCMSP
huangqi	MOL000378	7-O-methylisomucronulatol	Sodium channel protein type 5 subunit alpha	SCN5A	Q14524	TCMSP
huangqi	MOL000380	(6aR,11aR)-9,10-dimethoxy-6a,11a-dihydro-6H-benzofurano[3,2-c]chromen-3-ol	Sodium channel protein type 5 subunit alpha	SCN5A	Q14524	TCMSP
huangqi	MOL000098	quercetin	Sodium channel protein type 5 subunit alpha	SCN5A	Q14524	TCMSP
huangqi	MOL000378	7-O-methylisomucronulatol	Sodium-dependent dopamine transporter	SLC6A3	Q01959	TCMSP
huangqi	MOL000392	formononetin	Sodium-dependent dopamine transporter	SLC6A3	Q01959	TCMSP
huangqi	MOL000296	hederagenin	Sodium-dependent noradrenaline transporter	SLC6A2	P23975	TCMSP
huangqi	MOL000422	kaempferol	Sodium-dependent noradrenaline transporter	SLC6A2	P23975	TCMSP
huangqi	MOL000378	7-O-methylisomucronulatol	Sodium-dependent serotonin transporter	SLC6A4	P31645	TCMSP
huangqi	MOL000392	formononetin	Sodium-dependent serotonin transporter	SLC6A4	P31645	TCMSP
huangqi	MOL000422	kaempferol	Solute carrier family 2, facilitated glucose transporter member 4	SLC2A4	P14672	TCMSP
huangqi	MOL000098	quercetin	Solute carrier family 2, facilitated glucose transporter member 4	SLC2A4	P14672	TCMSP
huangqi	MOL000098	quercetin	Stromelysin-1	MMP3	P08254	TCMSP
huangqi	MOL000098	quercetin	Superoxide dismutase [Cu-Zn]	SOD1	P00441	TCMSP
jinquegen	MOL000422	kaempferol	5-hydroxytryptamine 2A receptor	HTR2A	P28223	TCMSP
jinquegen	MOL000422	kaempferol	Acetylcholinesterase	ACHE	P22303	TCMSP
jinquegen	MOL000422	kaempferol	Activator of 90 kDa heat shock protein ATPase homolog 1	AHSA1	O95433	TCMSP
jinquegen	MOL000422	kaempferol	Aldo-keto reductase family 1 member C3	AKR1C3	P42330	TCMSP
jinquegen	MOL000422	kaempferol	Alpha-1B adrenergic receptor	ADRA1B	P35368	TCMSP
jinquegen	MOL002284	Piceatannol	Amine oxidase [flavin-containing] B	MAOB	P27338	TCMSP
jinquegen	MOL000422	kaempferol	Androgen receptor	AR	P10275	TCMSP
jinquegen	MOL001689	Acacetin	Androgen receptor	AR	P10275	TCMSP
jinquegen	MOL000422	kaempferol	Antileukoproteinase	SLPI	P03973	TCMSP
jinquegen	MOL000422	kaempferol	Apoptosis regulator BAX	BAX	Q07812	TCMSP
jinquegen	MOL001689	Acacetin	Apoptosis regulator BAX	BAX	Q07812	TCMSP
jinquegen	MOL000422	kaempferol	Apoptosis regulator Bcl-2	P10415	BCL2	TCMSP
jinquegen	MOL001689	Acacetin	Apoptosis regulator Bcl-2	P10415	BCL2	TCMSP
jinquegen	MOL000422	kaempferol	Arachidonate 5-lipoxygenase	P09917	ALOX5	TCMSP
jinquegen	MOL000422	kaempferol	Aryl hydrocarbon receptor	P35869	AHR	TCMSP
jinquegen	MOL001689	Acacetin	Beta-2 adrenergic receptor	ADRB2	P07550	TCMSP
jinquegen	MOL000422	kaempferol	Calmodulin	CALM1	P0DP23	TCMSP
jinquegen	MOL001689	Acacetin	Calmodulin	CALM1	P0DP23	TCMSP
jinquegen	MOL000422	kaempferol	Caspase-3	CASP3	P42574	TCMSP
jinquegen	MOL001689	Acacetin	Caspase-3	CASP3	P42574	TCMSP
jinquegen	MOL001689	Acacetin	Caspase-8	CASP8	Q14790	TCMSP
jinquegen	MOL000422	kaempferol	Cell division control protein 2 homolog	CDK1	P06493	TCMSP
jinquegen	MOL001689	Acacetin	Cell division protein kinase 2	CDK2	P24941	TCMSP
jinquegen	MOL001689	Acacetin	Cellular tumor antigen p53	TP53	P04637	TCMSP
jinquegen	MOL001689	Acacetin	CGMP-inhibited 3',5'-cyclic phosphodiesterase A	PDE3A	Q14432	TCMSP
jinquegen	MOL000422	kaempferol	Coagulation factor VII	F7	P08709	TCMSP
jinquegen	MOL001689	Acacetin	Cyclin-dependent kinase inhibitor 1	CDKN1A	P38936	TCMSP
jinquegen	MOL001689	Acacetin	Cytochrome P450 19A1	CYP19A1	P11511	TCMSP
jinquegen	MOL000422	kaempferol	Cytochrome P450 1A1	CYP1A1	P04798	TCMSP
jinquegen	MOL000422	kaempferol	Cytochrome P450 1A2	CYP1A2	P05177	TCMSP
jinquegen	MOL000422	kaempferol	Cytochrome P450 1B1	CYP1B1	Q16678	TCMSP
jinquegen	MOL000422	kaempferol	Cytochrome P450 3A4	CYP3A4	P08684	TCMSP
jinquegen	MOL000422	kaempferol	Dipeptidyl peptidase IV	DPP4	P27487	TCMSP
jinquegen	MOL001689	Acacetin	Dipeptidyl peptidase IV	DPP4	P27487	TCMSP
jinquegen	MOL000422	kaempferol	DNA topoisomerase II	TOP2B	Q02880	TCMSP
jinquegen	MOL000422	kaempferol	E-selectin	SELE	P16581	TCMSP
jinquegen	MOL001689	Acacetin	Fatty acid synthase	FASN	P49327	TCMSP
jinquegen	MOL000422	kaempferol	Gamma-aminobutyric acid receptor subunit alpha-1	GABRA1	P14867	TCMSP
jinquegen	MOL000422	kaempferol	Gamma-aminobutyric-acid receptor alpha-2 subunit	GABRA2	P47869	TCMSP
jinquegen	MOL000422	kaempferol	Glutathione S-transferase Mu 1	GSTM1	P09488	TCMSP
jinquegen	MOL000422	kaempferol	Glutathione S-transferase Mu 2	GSTM2	P28161	TCMSP
jinquegen	MOL000422	kaempferol	Glutathione S-transferase P	GSTP1	P09211	TCMSP
jinquegen	MOL000422	kaempferol	Heat shock protein HSP 90	HSP 90	P08238	TCMSP
jinquegen	MOL001689	Acacetin	Heat shock protein HSP 90	HSP 90	P08238	TCMSP
jinquegen	MOL000422	kaempferol	Heme oxygenase 1	HMOX1	P09601	TCMSP
jinquegen	MOL000422	kaempferol	Hyaluronan synthase 2	HAS2	Q92819	TCMSP
jinquegen	MOL000422	kaempferol	Inhibitor of nuclear factor kappa-B kinase subunit beta	CHUK	O15111	TCMSP
jinquegen	MOL000422	kaempferol	Insulin receptor	INSR	P06213	TCMSP
jinquegen	MOL000422	kaempferol	Intercellular adhesion molecule 1	ICAM1	P05362	TCMSP
jinquegen	MOL000422	kaempferol	Interstitial collagenase	MMP1	P03956	TCMSP
jinquegen	MOL000422	kaempferol	Mitogen-activated protein kinase 8	MAPK8	P45983	TCMSP
jinquegen	MOL000422	kaempferol	mRNA of PKA Catalytic Subunit C-alpha	PRKACA	P17612	TCMSP
jinquegen	MOL002284	Piceatannol	mRNA of PKA Catalytic Subunit C-alpha	PRKACA	P17612	TCMSP
jinquegen	MOL001689	Acacetin	mRNA of PKA Catalytic Subunit C-alpha	PRKACA	P17612	TCMSP
jinquegen	MOL000422	kaempferol	Muscarinic acetylcholine receptor M1	CHRM1	P11229	TCMSP
jinquegen	MOL000422	kaempferol	Muscarinic acetylcholine receptor M2	CHRM2	P08172	TCMSP
jinquegen	MOL000422	kaempferol	Nitric oxide synthase, inducible	NOS2	P35228	TCMSP
jinquegen	MOL001689	Acacetin	Nitric oxide synthase, inducible	NOS2	P35228	TCMSP
jinquegen	MOL000422	kaempferol	Nitric-oxide synthase, endothelial	NOS3	P29474	TCMSP
jinquegen	MOL001689	Acacetin	Nuclear receptor coactivator 1	NCOA1	Q15788	TCMSP
jinquegen	MOL000422	kaempferol	Nuclear receptor coactivator 2	NCoA-2	Q15596	TCMSP
jinquegen	MOL001689	Acacetin	Nuclear receptor coactivator 2	NCoA-2	Q15596	TCMSP
jinquegen	MOL000422	kaempferol	Nuclear receptor subfamily 1 group I member 2	NR1I2	O75469	TCMSP
jinquegen	MOL000422	kaempferol	Nuclear receptor subfamily 1 group I member 3	NR1I3	Q14994	TCMSP
jinquegen	MOL000422	kaempferol	Peroxidase C1A	PRXC1A	P00433	TCMSP
jinquegen	MOL000422	kaempferol	Peroxisome proliferator activated receptor gamma	PPARG	P37231	TCMSP
jinquegen	MOL000422	kaempferol	Peroxisome proliferator-activated receptor gamma	PPARG	P37231	TCMSP
jinquegen	MOL000422	kaempferol	Phosphatidylinositol-4,5-bisphosphate 3-kinase catalytic subunit, gamma isoform	PIK3CG	P48736	TCMSP
jinquegen	MOL001689	Acacetin	Phosphatidylinositol-4,5-bisphosphate 3-kinase catalytic subunit, gamma isoform	PIK3CG	P48736	TCMSP
jinquegen	MOL000422	kaempferol	Progesterone receptor	PGR	P06401	TCMSP
jinquegen	MOL000422	kaempferol	Prostaglandin G/H synthase 1	PTGS1	P23219	TCMSP
jinquegen	MOL002284	Piceatannol	Prostaglandin G/H synthase 1	PTGS1	P23219	TCMSP
jinquegen	MOL001689	Acacetin	Prostaglandin G/H synthase 1	PTGS1	P23219	TCMSP
jinquegen	MOL000422	kaempferol	Prostaglandin G/H synthase 2	PTGS2	P35354	TCMSP
jinquegen	MOL002284	Piceatannol	Prostaglandin G/H synthase 2	PTGS2	P35354	TCMSP
jinquegen	MOL001689	Acacetin	Prostaglandin G/H synthase 2	PTGS2	P35354	TCMSP
jinquegen	MOL000422	kaempferol	RAC-alpha serine/threonine-protein kinase	AKT1	P31749	TCMSP
jinquegen	MOL001689	Acacetin	Serine/threonine-protein kinase Chk1	CHEK1	O14757	TCMSP
jinquegen	MOL000422	kaempferol	Serine/threonine-protein phosphatase 2B catalytic subunit alpha isoform	PPP3CA	Q08209	TCMSP
jinquegen	MOL000422	kaempferol	Signal transducer and activator of transcription 1-alpha/beta	STAT1	P42224	TCMSP
jinquegen	MOL000422	kaempferol	Sodium-dependent noradrenaline transporter	SLC6A2	P23975	TCMSP
jinquegen	MOL000422	kaempferol	Solute carrier family 2, facilitated glucose transporter member 4	SLC2A4	P14672	TCMSP
lulutong	MOL000519	coniferin	Alpha-1B adrenergic receptor	ADRA1B	P35368	TCMSP
lulutong	MOL000519	coniferin	Alpha-1D adrenergic receptor	ADRA1D	P25100	TCMSP
lulutong	MOL000519	coniferin	Androgen receptor	AR	P10275	TCMSP
lulutong	MOL000519	coniferin	Beta-2 adrenergic receptor	ADRB2	P07550	TCMSP
lulutong	MOL000519	coniferin	Beta-lactamase	LACTB2	Q53H82	TCMSP
lulutong	MOL000519	coniferin	Carbonic anhydrase II	CA II	Q6LD99	TCMSP
lulutong	MOL000519	coniferin	Cell division protein kinase 2	CDK2	P24941	TCMSP
lulutong	MOL000519	coniferin	CGMP-inhibited 3',5'-cyclic phosphodiesterase A	PDE3A	Q14432	TCMSP
lulutong	MOL000519	coniferin	Cyclin-A2	CCNA2	P20248	TCMSP
lulutong	MOL000519	coniferin	DNA topoisomerase II	TOP2B	Q02880	TCMSP
lulutong	MOL000358	beta-sitosterol	Dopamine D1 receptor	DRD1	P21728	TCMSP
lulutong	MOL000519	coniferin	Estrogen receptor	ESR1	P03372	TCMSP
lulutong	MOL000358	beta-sitosterol	Heat shock protein HSP 90	HSP 90	P08238	TCMSP
lulutong	MOL000519	coniferin	Ig gamma-1 chain C region	IGHG1	P01857	TCMSP
lulutong	MOL000359	sitosterol	Mineralocorticoid receptor	NR3C2	P08235	TCMSP
lulutong	MOL000358	beta-sitosterol	mRNA of PKA Catalytic Subunit C-alpha	PRKACA	P17612	TCMSP
lulutong	MOL000519	coniferin	Muscarinic acetylcholine receptor M1	CHRM1	P11229	TCMSP
lulutong	MOL000358	beta-sitosterol	Muscarinic acetylcholine receptor M3	CHRM3	P20309	TCMSP
lulutong	MOL000519	coniferin	Muscarinic acetylcholine receptor M3	CHRM3	P20309	TCMSP
lulutong	MOL000519	coniferin	Mu-type opioid receptor	OPRM1	P35372	TCMSP
lulutong	MOL000519	coniferin	Neuronal acetylcholine receptor protein, alpha-7 chain	CHRNA7	P36544	TCMSP
lulutong	MOL000519	coniferin	Nuclear receptor coactivator 1	NCOA1	Q15788	TCMSP
lulutong	MOL000358	beta-sitosterol	Nuclear receptor coactivator 2	NCoA-2	Q15596	TCMSP
lulutong	MOL000359	sitosterol	Nuclear receptor coactivator 2	NCoA-2	Q15596	TCMSP
lulutong	MOL000519	coniferin	Nuclear receptor coactivator 2	NCoA-2	Q15596	TCMSP
lulutong	MOL000519	coniferin	Peroxisome proliferator activated receptor gamma	PPARG	P37231	TCMSP
lulutong	MOL000358	beta-sitosterol	Phosphatidylinositol-4,5-bisphosphate 3-kinase catalytic subunit, gamma isoform	PIK3CG	P48736	TCMSP
lulutong	MOL000358	beta-sitosterol	Potassium voltage-gated channel subfamily H member 2	KCNH2	Q12809	TCMSP
lulutong	MOL000358	beta-sitosterol	Progesterone receptor	PGR	P06401	TCMSP
lulutong	MOL000359	sitosterol	Progesterone receptor	PGR	P06401	TCMSP
lulutong	MOL000358	beta-sitosterol	Prostaglandin G/H synthase 1	PTGS1	P23219	TCMSP
lulutong	MOL000358	beta-sitosterol	Prostaglandin G/H synthase 2	PTGS2	P35354	TCMSP
lulutong	MOL000519	coniferin	Prostaglandin G/H synthase 2	PTGS2	P35354	TCMSP
lulutong	MOL000519	coniferin	Proto-oncogene serine/threonine-protein kinase Pim-1	PIM1	P11309	TCMSP
lulutong	MOL000519	coniferin	Sodium channel protein type 5 subunit alpha	SCN5A	Q14524	TCMSP
niuxi	MOL000422	kaempferol	26S proteasome non-ATPase regulatory subunit 3	PSMD3	O43242	TCMSP
niuxi	MOL000449	Stigmasterol	26S proteasome non-ATPase regulatory subunit 3	PSMD3	O43242	TCMSP
niuxi	MOL000098	quercetin	26S proteasome non-ATPase regulatory subunit 3	PSMD3	O43242	TCMSP
niuxi	MOL000098	quercetin	72 kDa type IV collagenase	MMP2	P08253	TCMSP
niuxi	MOL000098	quercetin	78 kDa glucose-regulated protein	HSPA5	P11021	TCMSP
niuxi	MOL000422	kaempferol	Acetylcholinesterase	ACHE	P22303	TCMSP
niuxi	MOL000098	quercetin	Acetylcholinesterase	ACHE	P22303	TCMSP
niuxi	MOL000098	quercetin	Acetyl-CoA carboxylase 1	PRKAA1	Q13131	TCMSP
niuxi	MOL000173	wogonin	Activator of 90 kDa heat shock protein ATPase homolog 1	AHSA1	O95433	TCMSP
niuxi	MOL000422	kaempferol	Activator of 90 kDa heat shock protein ATPase homolog 1	AHSA1	O95433	TCMSP
niuxi	MOL000098	quercetin	Activator of 90 kDa heat shock protein ATPase homolog 1	AHSA1	O95433	TCMSP
niuxi	MOL000449	Stigmasterol	Alcohol dehydrogenase 1C	ADH1B	P00325	TCMSP
niuxi	MOL000422	kaempferol	Aldo-keto reductase family 1 member C3	AKR1C3	P42330	TCMSP
niuxi	MOL000449	Stigmasterol	Aldose reductase	P15121	AKR1B1	TCMSP
niuxi	MOL000098	quercetin	Aldose reductase	P15121	AKR1B1	TCMSP
niuxi	MOL000449	Stigmasterol	Alpha-1A adrenergic receptor	P35348	ADRA1A	TCMSP
niuxi	MOL000422	kaempferol	Alpha-1B adrenergic receptor	ADRA1B	P35368	TCMSP
niuxi	MOL000449	Stigmasterol	Alpha-1B adrenergic receptor	ADRA1B	P35368	TCMSP
niuxi	MOL000449	Stigmasterol	Alpha-2A adrenergic receptor	ADRA2A	P08913	TCMSP
niuxi	MOL000449	Stigmasterol	Amine oxidase [flavin-containing] A	MAOA	P21397	TCMSP
niuxi	MOL000449	Stigmasterol	Amine oxidase [flavin-containing] B	MAOB	P27338	TCMSP
niuxi	MOL000098	quercetin	Amine oxidase [flavin-containing] B	MAOB	P27338	TCMSP
niuxi	MOL001454	berberine	Androgen receptor	AR	P10275	TCMSP
niuxi	MOL001458	coptisine	Androgen receptor	AR	P10275	TCMSP
niuxi	MOL000173	wogonin	Androgen receptor	AR	P10275	TCMSP
niuxi	MOL002714	baicalein	Androgen receptor	AR	P10275	TCMSP
niuxi	MOL002897	epiberberine	Androgen receptor	AR	P10275	TCMSP
niuxi	MOL003847	Inophyllum E	Androgen receptor	AR	P10275	TCMSP
niuxi	MOL000422	kaempferol	Androgen receptor	AR	P10275	TCMSP
niuxi	MOL000785	palmatine	Androgen receptor	AR	P10275	TCMSP
niuxi	MOL000098	quercetin	Androgen receptor	AR	P10275	TCMSP
niuxi	MOL000422	kaempferol	Antileukoproteinase	SLPI	P03973	TCMSP
niuxi	MOL002714	baicalein	Apolipoprotein D	APOD	P05090	TCMSP
niuxi	MOL000173	wogonin	Apoptosis regulator BAX	BAX	Q07812	TCMSP
niuxi	MOL002714	baicalein	Apoptosis regulator BAX	BAX	Q07812	TCMSP
niuxi	MOL000422	kaempferol	Apoptosis regulator BAX	BAX	Q07812	TCMSP
niuxi	MOL000098	quercetin	Apoptosis regulator BAX	BAX	Q07812	TCMSP
niuxi	MOL000173	wogonin	Apoptosis regulator Bcl-2	P10415	BCL2	TCMSP
niuxi	MOL002714	baicalein	Apoptosis regulator Bcl-2	P10415	BCL2	TCMSP
niuxi	MOL000422	kaempferol	Apoptosis regulator Bcl-2	P10415	BCL2	TCMSP
niuxi	MOL000098	quercetin	Apoptosis regulator Bcl-2	P10415	BCL2	TCMSP
niuxi	MOL002714	baicalein	Arachidonate 12-lipoxygenase, 12S-type	P18054	ALOX12	TCMSP
niuxi	MOL000422	kaempferol	Arachidonate 5-lipoxygenase	P09917	ALOX5	TCMSP
niuxi	MOL000098	quercetin	Arachidonate 5-lipoxygenase	P09917	ALOX5	TCMSP
niuxi	MOL002714	baicalein	Aryl hydrocarbon receptor	P35869	AHR	TCMSP
niuxi	MOL000422	kaempferol	Aryl hydrocarbon receptor	P35869	AHR	TCMSP
niuxi	MOL000098	quercetin	Aryl hydrocarbon receptor	P35869	AHR	TCMSP
niuxi	MOL000098	quercetin	ATP-binding cassette sub-family G member 2	Q9UNQ0	ABCG2	TCMSP
niuxi	MOL000098	quercetin	Baculoviral IAP repeat-containing protein 5	BIRC5	O15392	TCMSP
niuxi	MOL000173	wogonin	Bcl-2-binding component 3	BBC3	Q9BXH1	TCMSP
niuxi	MOL000098	quercetin	Bcl-2-like protein 1	BCL2L1	Q07817	TCMSP
niuxi	MOL000449	Stigmasterol	Beta-1 adrenergic receptor	ADRB1	P08588	TCMSP
niuxi	MOL001454	berberine	Beta-2 adrenergic receptor	ADRB2	P07550	TCMSP
niuxi	MOL000173	wogonin	Beta-2 adrenergic receptor	ADRB2	P07550	TCMSP
niuxi	MOL000449	Stigmasterol	Beta-2 adrenergic receptor	ADRB2	P07550	TCMSP
niuxi	MOL000785	palmatine	Beta-2 adrenergic receptor	ADRB2	P07550	TCMSP
niuxi	MOL000098	quercetin	Beta-2 adrenergic receptor	ADRB2	P07550	TCMSP
niuxi	MOL001454	berberine	Calmodulin	CALM1	P0DP23	TCMSP
niuxi	MOL000173	wogonin	Calmodulin	CALM1	P0DP23	TCMSP
niuxi	MOL002714	baicalein	Calmodulin	CALM1	P0DP23	TCMSP
niuxi	MOL000422	kaempferol	Calmodulin	CALM1	P0DP23	TCMSP
niuxi	MOL000785	palmatine	Calmodulin	CALM1	P0DP23	TCMSP
niuxi	MOL001454	berberine	cAMP and cAMP-inhibited cGMP 3',5'-cyclic phosphodiesterase 10A	PDE10A	Q9Y233	TCMSP
niuxi	MOL002897	epiberberine	cAMP and cAMP-inhibited cGMP 3',5'-cyclic phosphodiesterase 10A	PDE10A	Q9Y233	TCMSP
niuxi	MOL000173	wogonin	Caspase-3	CASP3	P42574	TCMSP
niuxi	MOL002714	baicalein	Caspase-3	CASP3	P42574	TCMSP
niuxi	MOL000422	kaempferol	Caspase-3	CASP3	P42574	TCMSP
niuxi	MOL000098	quercetin	Caspase-3	CASP3	P42574	TCMSP
niuxi	MOL000098	quercetin	Caspase-8	CASP8	Q14790	TCMSP
niuxi	MOL000173	wogonin	Caspase-9	CASP9	P55211	TCMSP
niuxi	MOL000098	quercetin	Caspase-9	CASP9	P55211	TCMSP
niuxi	MOL000098	quercetin	Cathepsin D	CTSD	P07339	TCMSP
niuxi	MOL000098	quercetin	Caveolin-1	CAV1	Q03135	TCMSP
niuxi	MOL000173	wogonin	C-C motif chemokine 2	CCL2	P13500	TCMSP
niuxi	MOL000098	quercetin	C-C motif chemokine 2	CCL2	P13500	TCMSP
niuxi	MOL000098	quercetin	CD40 ligand	CD40LG	P29965	TCMSP
niuxi	MOL002714	baicalein	Cell division control protein 2 homolog	CDK1	P06493	TCMSP
niuxi	MOL000422	kaempferol	Cell division control protein 2 homolog	CDK1	P06493	TCMSP
niuxi	MOL000098	quercetin	Cell division control protein 2 homolog	CDK1	P06493	TCMSP
niuxi	MOL000173	wogonin	Cell division protein kinase 2	CDK2	P24941	TCMSP
niuxi	MOL000785	palmatine	Cell division protein kinase 2	CDK2	P24941	TCMSP
niuxi	MOL000173	wogonin	Cellular tumor antigen p53	TP53	P04637	TCMSP
niuxi	MOL002714	baicalein	Cellular tumor antigen p53	TP53	P04637	TCMSP
niuxi	MOL000098	quercetin	Cellular tumor antigen p53	TP53	P04637	TCMSP
niuxi	MOL000173	wogonin	CGMP-inhibited 3',5'-cyclic phosphodiesterase A	PDE3A	Q14432	TCMSP
niuxi	MOL002714	baicalein	CGMP-inhibited 3',5'-cyclic phosphodiesterase A	PDE3A	Q14432	TCMSP
niuxi	MOL000449	Stigmasterol	Chymotrypsinogen B	CTRB1	P17538	TCMSP
niuxi	MOL000098	quercetin	Claudin-4	CLDN4	O14493	TCMSP
niuxi	MOL000422	kaempferol	Coagulation factor VII	F7	P08709	TCMSP
niuxi	MOL000785	palmatine	Coagulation factor VII	F7	P08709	TCMSP
niuxi	MOL000098	quercetin	Coagulation factor VII	F7	P08709	TCMSP
niuxi	MOL001454	berberine	Coagulation factor Xa	F9	P00740	TCMSP
niuxi	MOL002776	Baicalin	Coagulation factor Xa	F9	P00740	TCMSP
niuxi	MOL003847	Inophyllum E	Coagulation factor Xa	F9	P00740	TCMSP
niuxi	MOL000098	quercetin	Coagulation factor Xa	F9	P00740	TCMSP
niuxi	MOL000098	quercetin	Collagen alpha-1(I) chain	COL1A1	P02452	TCMSP
niuxi	MOL000098	quercetin	Collagen alpha-1(III) chain	COL3A1	P02461	TCMSP
niuxi	MOL000098	quercetin	C-reactive protein	CRP	P02741	TCMSP
niuxi	MOL000098	quercetin	C-X-C motif chemokine 10	CXCL10	P02778	TCMSP
niuxi	MOL000098	quercetin	C-X-C motif chemokine 11	CXCL10	P02778	TCMSP
niuxi	MOL000098	quercetin	C-X-C motif chemokine 2	CXCL10	P02778	TCMSP
niuxi	MOL000173	wogonin	Cyclin-dependent kinase inhibitor 1	CDKN1A	P38936	TCMSP
niuxi	MOL000098	quercetin	Cyclin-dependent kinase inhibitor 1	CDKN1A	P38936	TCMSP
niuxi	MOL000098	quercetin	Cyclin-dependent kinase inhibitor 2A, isoforms 1/2/3	CDKN1A	P38936	TCMSP
niuxi	MOL002714	baicalein	Cytochrome c	CYC1	P08574	TCMSP
niuxi	MOL000422	kaempferol	Cytochrome P450 1A1	CYP1A1	P04798	TCMSP
niuxi	MOL000098	quercetin	Cytochrome P450 1A1	CYP1A1	P04798	TCMSP
niuxi	MOL000422	kaempferol	Cytochrome P450 1A2	CYP1A2	P05177	TCMSP
niuxi	MOL000098	quercetin	Cytochrome P450 1A2	CYP1A2	P05177	TCMSP
niuxi	MOL000422	kaempferol	Cytochrome P450 1B1	CYP1B1	Q16678	TCMSP
niuxi	MOL000098	quercetin	Cytochrome P450 1B1	CYP1B1	Q16678	TCMSP
niuxi	MOL000422	kaempferol	Cytochrome P450 3A4	CYP3A4	P08684	TCMSP
niuxi	MOL000098	quercetin	Cytochrome P450 3A4	CYP3A4	P08684	TCMSP
niuxi	MOL000098	quercetin	DDB1- and CUL4-associated factor 5	DCAF5	Q96JK2	TCMSP
niuxi	MOL000173	wogonin	Dipeptidyl peptidase IV	DPP4	P27487	TCMSP
niuxi	MOL002714	baicalein	Dipeptidyl peptidase IV	DPP4	P27487	TCMSP
niuxi	MOL000422	kaempferol	Dipeptidyl peptidase IV	DPP4	P27487	TCMSP
niuxi	MOL000098	quercetin	Dipeptidyl peptidase IV	DPP4	P27487	TCMSP
niuxi	MOL000098	quercetin	DNA gyrase subunit B	TOP2A	P11388	TCMSP
niuxi	MOL000098	quercetin	DNA topoisomerase 1	TOP1	P11387	TCMSP
niuxi	MOL000098	quercetin	DNA topoisomerase 2-alpha	TOP1MT	Q969P6	TCMSP
niuxi	MOL003847	Inophyllum E	DNA topoisomerase II	TOP2B	Q02880	TCMSP
niuxi	MOL000422	kaempferol	DNA topoisomerase II	TOP2B	Q02880	TCMSP
niuxi	MOL000098	quercetin	DNA topoisomerase II	TOP2B	Q02880	TCMSP
niuxi	MOL000358	beta-sitosterol	Dopamine D1 receptor	DRD1	P21728	TCMSP
niuxi	MOL000098	quercetin	Dual oxidase 2	DUOX2	Q9NRD8	TCMSP
niuxi	MOL002714	baicalein	Egl nine homolog 1	EGLN1	Q9GZT9	TCMSP
niuxi	MOL000098	quercetin	Epidermal growth factor receptor	GRB7	Q14451	TCMSP
niuxi	MOL000422	kaempferol	E-selectin	SELE	P16581	TCMSP
niuxi	MOL000098	quercetin	E-selectin	SELE	P16581	TCMSP
niuxi	MOL001454	berberine	Estrogen receptor	ESR1	P03372	TCMSP
niuxi	MOL001458	coptisine	Estrogen receptor	ESR1	P03372	TCMSP
niuxi	MOL000173	wogonin	Estrogen receptor	ESR1	P03372	TCMSP
niuxi	MOL002897	epiberberine	Estrogen receptor	ESR1	P03372	TCMSP
niuxi	MOL003847	Inophyllum E	Estrogen receptor	ESR1	P03372	TCMSP
niuxi	MOL000785	palmatine	Estrogen receptor	ESR1	P03372	TCMSP
niuxi	MOL003847	Inophyllum E	Estrogen receptor beta	ESR1	P03372	TCMSP
niuxi	MOL000785	palmatine	Estrogen receptor beta	ESR1	P03372	TCMSP
niuxi	MOL000098	quercetin	Estrogen sulfotransferase	SULT1E1	P49888	TCMSP
niuxi	MOL000098	quercetin	ETS domain-containing protein Elk-1	ELK1	P19419	TCMSP
niuxi	MOL000173	wogonin	Eukaryotic translation initiation factor 6	EIF6	P56537	TCMSP
niuxi	MOL000098	quercetin	Eukaryotic translation initiation factor 6	EIF6	P56537	TCMSP
niuxi	MOL002714	baicalein	Fatty acid-binding protein, epidermal	FABP5	Q01469	TCMSP
niuxi	MOL000173	wogonin	Fibronectin	FN1	P02751	TCMSP
niuxi	MOL002714	baicalein	Fos-related antigen 1	FOSL1	P15407	TCMSP
niuxi	MOL002714	baicalein	Fos-related antigen 2	FOSL2	P15408	TCMSP
niuxi	MOL000173	wogonin	G1/S-specific cyclin-D1	CCND1	P24385	TCMSP
niuxi	MOL000098	quercetin	G1/S-specific cyclin-D1	CCND1	P24385	TCMSP
niuxi	MOL002714	baicalein	G2/mitotic-specific cyclin-B1	CCNB1	P14635	TCMSP
niuxi	MOL000098	quercetin	G2/mitotic-specific cyclin-B1	CCNB1	P14635	TCMSP
niuxi	MOL000173	wogonin	Gamma-aminobutyric acid receptor subunit alpha-1	GABRA1	P14867	TCMSP
niuxi	MOL000422	kaempferol	Gamma-aminobutyric acid receptor subunit alpha-1	GABRA1	P14867	TCMSP
niuxi	MOL000449	Stigmasterol	Gamma-aminobutyric acid receptor subunit alpha-1	GABRA1	P14867	TCMSP
niuxi	MOL000098	quercetin	Gamma-aminobutyric acid receptor subunit alpha-1	GABRA1	P14867	TCMSP
niuxi	MOL000422	kaempferol	Gamma-aminobutyric-acid receptor alpha-2 subunit	GABRA2	P47869	TCMSP
niuxi	MOL000449	Stigmasterol	Gamma-aminobutyric-acid receptor alpha-3 subunit	GABRA2	P47869	TCMSP
niuxi	MOL000098	quercetin	Gap junction alpha-1 protein	GJA1	P17302	TCMSP
niuxi	MOL000422	kaempferol	Glutathione S-transferase Mu 1	GSTM1	P09488	TCMSP
niuxi	MOL000098	quercetin	Glutathione S-transferase Mu 1	GSTM1	P09488	TCMSP
niuxi	MOL000422	kaempferol	Glutathione S-transferase Mu 2	GSTM2	P28161	TCMSP
niuxi	MOL000098	quercetin	Glutathione S-transferase Mu 2	GSTM2	P28161	TCMSP
niuxi	MOL000422	kaempferol	Glutathione S-transferase P	GSTP1	P09211	TCMSP
niuxi	MOL000098	quercetin	Glutathione S-transferase P	GSTP1	P09211	TCMSP
niuxi	MOL000173	wogonin	Glycogen synthase kinase-3 beta	GSK3B	P49841	TCMSP
niuxi	MOL003847	Inophyllum E	Glycogen synthase kinase-3 beta	GSK3B	P49841	TCMSP
niuxi	MOL000098	quercetin	Heat shock factor protein 1	HSF1	Q00613	TCMSP
niuxi	MOL000098	quercetin	Heat shock protein beta-1	HSPB1	P04792	TCMSP
niuxi	MOL001454	berberine	Heat shock protein HSP 90	HSP 90	P08238	TCMSP
niuxi	MOL000173	wogonin	Heat shock protein HSP 90	HSP 90	P08238	TCMSP
niuxi	MOL002714	baicalein	Heat shock protein HSP 90	HSP 90	P08238	TCMSP
niuxi	MOL000358	beta-sitosterol	Heat shock protein HSP 90	HSP 90	P08238	TCMSP
niuxi	MOL000422	kaempferol	Heat shock protein HSP 90	HSP 90	P08238	TCMSP
niuxi	MOL000785	palmatine	Heat shock protein HSP 90	HSP 90	P08238	TCMSP
niuxi	MOL000098	quercetin	Heat shock protein HSP 90	HSP 90	P08238	TCMSP
niuxi	MOL000422	kaempferol	Heme oxygenase 1	HMOX1	P09601	TCMSP
niuxi	MOL000098	quercetin	Heme oxygenase 1	HMOX1	P09601	TCMSP
niuxi	MOL000098	quercetin	Hexokinase-2	HK2	P52789	TCMSP
niuxi	MOL000098	quercetin	Homeobox protein Nkx-3.1	NKX3-1	Q99801	TCMSP
niuxi	MOL000422	kaempferol	Hyaluronan synthase 2	HAS2	Q92819	TCMSP
niuxi	MOL000098	quercetin	Hyaluronan synthase 2	HAS2	Q92819	TCMSP
niuxi	MOL002714	baicalein	Hypoxia-inducible factor 1-alpha	HIF1A	Q16665	TCMSP
niuxi	MOL000098	quercetin	Hypoxia-inducible factor 1-alpha	HIF1A	Q16665	TCMSP
niuxi	MOL000449	Stigmasterol	Ig gamma-1 chain C region	IGHG1	P01857	TCMSP
niuxi	MOL000173	wogonin	Induced myeloid leukemia cell differentiation protein Mcl-1	MCL1	Q07820	TCMSP
niuxi	MOL000098	quercetin	Inhibitor of nuclear factor kappa-B kinase subunit alpha	CHUK	O15111	TCMSP
niuxi	MOL000422	kaempferol	Inhibitor of nuclear factor kappa-B kinase subunit beta	CHUK	O15111	TCMSP
niuxi	MOL000422	kaempferol	Insulin receptor	INSR	P06213	TCMSP
niuxi	MOL000098	quercetin	Insulin receptor	INSR	P06213	TCMSP
niuxi	MOL002714	baicalein	Insulin-like growth factor II	IGF2	P01344	TCMSP
niuxi	MOL000098	quercetin	Insulin-like growth factor II	IGF2	P01344	TCMSP
niuxi	MOL000098	quercetin	Insulin-like growth factor-binding protein 3	IGFBP3	P17936	TCMSP
niuxi	MOL000422	kaempferol	Intercellular adhesion molecule 1	ICAM1	P05362	TCMSP
niuxi	MOL000098	quercetin	Intercellular adhesion molecule 1	ICAM1	P05362	TCMSP
niuxi	MOL000098	quercetin	Interferon gamma	IFNG	P01579	TCMSP
niuxi	MOL000098	quercetin	Interferon regulatory factor 1	IRF1	P10914	TCMSP
niuxi	MOL000098	quercetin	Interleukin-1 alpha	IL1A	P01583	TCMSP
niuxi	MOL000098	quercetin	Interleukin-1 beta	IL1A	P01583	TCMSP
niuxi	MOL000098	quercetin	Interleukin-10	IL10	P22301	TCMSP
niuxi	MOL000098	quercetin	Interleukin-2	IL2	P60568	TCMSP
niuxi	MOL000173	wogonin	Interleukin-6	IL6	P05231	TCMSP
niuxi	MOL000098	quercetin	Interleukin-6	IL6	P05231	TCMSP
niuxi	MOL000173	wogonin	Interleukin-8	CXCL8	P10145	TCMSP
niuxi	MOL000098	quercetin	Interleukin-8	CXCL8	P10145	TCMSP
niuxi	MOL000173	wogonin	Interstitial collagenase	MMP1	P03956	TCMSP
niuxi	MOL000422	kaempferol	Interstitial collagenase	MMP1	P03956	TCMSP
niuxi	MOL000098	quercetin	Interstitial collagenase	MMP1	P03956	TCMSP
niuxi	MOL000449	Stigmasterol	Leukotriene A-4 hydrolase	LTA4H	P09960	TCMSP
niuxi	MOL000098	quercetin	Maltase-glucoamylase, intestinal	MGAM	O43451	TCMSP
niuxi	MOL002714	baicalein	Matrix metalloproteinase-9	MMP9	P14780	TCMSP
niuxi	MOL000098	quercetin	Matrix metalloproteinase-9	MMP9	P14780	TCMSP
niuxi	MOL001006	poriferasta-7,22E-dien-3beta-ol	Mineralocorticoid receptor	NR3C2	P08235	TCMSP
niuxi	MOL004355	Spinasterol	Mineralocorticoid receptor	NR3C2	P08235	TCMSP
niuxi	MOL000449	Stigmasterol	Mineralocorticoid receptor	NR3C2	P08235	TCMSP
niuxi	MOL000098	quercetin	Mitogen-activated protein kinase 1	MAPK1	P28482	TCMSP
niuxi	MOL000173	wogonin	Mitogen-activated protein kinase 14	MAPK14	Q16539	TCMSP
niuxi	MOL000422	kaempferol	Mitogen-activated protein kinase 8	MAPK8	P45983	TCMSP
niuxi	MOL001454	berberine	mRNA of PKA Catalytic Subunit C-alpha	PRKACA	P17612	TCMSP
niuxi	MOL000173	wogonin	mRNA of PKA Catalytic Subunit C-alpha	PRKACA	P17612	TCMSP
niuxi	MOL002714	baicalein	mRNA of PKA Catalytic Subunit C-alpha	PRKACA	P17612	TCMSP
niuxi	MOL002897	epiberberine	mRNA of PKA Catalytic Subunit C-alpha	PRKACA	P17612	TCMSP
niuxi	MOL000358	beta-sitosterol	mRNA of PKA Catalytic Subunit C-alpha	PRKACA	P17612	TCMSP
niuxi	MOL000422	kaempferol	mRNA of PKA Catalytic Subunit C-alpha	PRKACA	P17612	TCMSP
niuxi	MOL000449	Stigmasterol	mRNA of PKA Catalytic Subunit C-alpha	PRKACA	P17612	TCMSP
niuxi	MOL000785	palmatine	mRNA of PKA Catalytic Subunit C-alpha	PRKACA	P17612	TCMSP
niuxi	MOL000098	quercetin	mRNA of PKA Catalytic Subunit C-alpha	PRKACA	P17612	TCMSP
niuxi	MOL002776	Baicalin	mRNA of Protein-tyrosine phosphatase, non-receptor type 1	PTPN6	P29350	TCMSP
niuxi	MOL000422	kaempferol	Muscarinic acetylcholine receptor M1	CHRM1	P11229	TCMSP
niuxi	MOL000449	Stigmasterol	Muscarinic acetylcholine receptor M1	CHRM1	P11229	TCMSP
niuxi	MOL000422	kaempferol	Muscarinic acetylcholine receptor M2	CHRM2	P08172	TCMSP
niuxi	MOL000449	Stigmasterol	Muscarinic acetylcholine receptor M2	CHRM2	P08172	TCMSP
niuxi	MOL000358	beta-sitosterol	Muscarinic acetylcholine receptor M3	CHRM3	P20309	TCMSP
niuxi	MOL000449	Stigmasterol	Muscarinic acetylcholine receptor M3	CHRM3	P20309	TCMSP
niuxi	MOL000098	quercetin	Myc proto-oncogene protein	MYC	P01106	TCMSP
niuxi	MOL002714	baicalein	Myeloperoxidase	MPO	P05164	TCMSP
niuxi	MOL000098	quercetin	Myeloperoxidase	MPO	P05164	TCMSP
niuxi	MOL000098	quercetin	NAD(P)H dehydrogenase [quinone] 1	NQO1	P15559	TCMSP
niuxi	MOL002714	baicalein	NADPH oxidase 5	NOX5	Q96PH1	TCMSP
niuxi	MOL000098	quercetin	NADPH--cytochrome P450 reductase	POR	P16435	TCMSP
niuxi	MOL000449	Stigmasterol	Neuronal acetylcholine receptor protein, alpha-7 chain	CHRNA7	P36544	TCMSP
niuxi	MOL000098	quercetin	Neutrophil cytosol factor 1	NCF1	P14598	TCMSP
niuxi	MOL000098	quercetin	NF-kappa-B inhibitor alpha	NFKBIA	P25963	TCMSP
niuxi	MOL000098	quercetin	Nitric oxide synthase, endothelial	NOS3	P29474	TCMSP
niuxi	MOL001454	berberine	Nitric oxide synthase, inducible	NOS2	P35228	TCMSP
niuxi	MOL001458	coptisine	Nitric oxide synthase, inducible	NOS2	P35228	TCMSP
niuxi	MOL000173	wogonin	Nitric oxide synthase, inducible	NOS2	P35228	TCMSP
niuxi	MOL002897	epiberberine	Nitric oxide synthase, inducible	NOS2	P35228	TCMSP
niuxi	MOL000422	kaempferol	Nitric oxide synthase, inducible	NOS2	P35228	TCMSP
niuxi	MOL000785	palmatine	Nitric oxide synthase, inducible	NOS2	P35228	TCMSP
niuxi	MOL001454	berberine	Nitric-oxide synthase, endothelial	NOS3	P29474	TCMSP
niuxi	MOL001458	coptisine	Nitric-oxide synthase, endothelial	NOS3	P29474	TCMSP
niuxi	MOL002897	epiberberine	Nitric-oxide synthase, endothelial	NOS3	P29474	TCMSP
niuxi	MOL000422	kaempferol	Nitric-oxide synthase, endothelial	NOS3	P29474	TCMSP
niuxi	MOL000785	palmatine	Nitric-oxide synthase, endothelial	NOS3	P29474	TCMSP
niuxi	MOL000098	quercetin	Nitric-oxide synthase, endothelial	NOS3	P29474	TCMSP
niuxi	MOL000098	quercetin	Nuclear factor erythroid 2-related factor 2	NFE2L2	Q16236	TCMSP
niuxi	MOL002714	baicalein	Nuclear factor of activated T-cells, cytoplasmic 1	NFATC1	O95644	TCMSP
niuxi	MOL002714	baicalein	Nuclear receptor coactivator 1	NCOA1	Q15788	TCMSP
niuxi	MOL000449	Stigmasterol	Nuclear receptor coactivator 1	NCOA1	Q15788	TCMSP
niuxi	MOL001006	poriferasta-7,22E-dien-3beta-ol	Nuclear receptor coactivator 2	NCoA-2	Q15596	TCMSP
niuxi	MOL001454	berberine	Nuclear receptor coactivator 2	NCoA-2	Q15596	TCMSP
niuxi	MOL002714	baicalein	Nuclear receptor coactivator 2	NCoA-2	Q15596	TCMSP
niuxi	MOL002897	epiberberine	Nuclear receptor coactivator 2	NCoA-2	Q15596	TCMSP
niuxi	MOL000358	beta-sitosterol	Nuclear receptor coactivator 2	NCoA-2	Q15596	TCMSP
niuxi	MOL000422	kaempferol	Nuclear receptor coactivator 2	NCoA-2	Q15596	TCMSP
niuxi	MOL004355	Spinasterol	Nuclear receptor coactivator 2	NCoA-2	Q15596	TCMSP
niuxi	MOL000449	Stigmasterol	Nuclear receptor coactivator 2	NCoA-2	Q15596	TCMSP
niuxi	MOL000785	palmatine	Nuclear receptor coactivator 2	NCoA-2	Q15596	TCMSP
niuxi	MOL000098	quercetin	Nuclear receptor coactivator 2	NCoA-2	Q15596	TCMSP
niuxi	MOL000422	kaempferol	Nuclear receptor subfamily 1 group I member 2	NR1I2	O75469	TCMSP
niuxi	MOL000098	quercetin	Nuclear receptor subfamily 1 group I member 2	NR1I2	O75469	TCMSP
niuxi	MOL000422	kaempferol	Nuclear receptor subfamily 1 group I member 3	NR1I3	Q14994	TCMSP
niuxi	MOL000098	quercetin	Nuclear receptor subfamily 1 group I member 3	NR1I3	Q14994	TCMSP
niuxi	MOL000098	quercetin	Ornithine decarboxylase	ODC1	P11926	TCMSP
niuxi	MOL000098	quercetin	Osteopontin	SPP1	P10451	TCMSP
niuxi	MOL000422	kaempferol	Peroxidase C1A	PRXC1A	P00433	TCMSP
niuxi	MOL000098	quercetin	Peroxidase C1A	PRXC1A	P00433	TCMSP
niuxi	MOL000173	wogonin	Peroxisome proliferator activated receptor gamma	PPARG	P37231	TCMSP
niuxi	MOL000422	kaempferol	Peroxisome proliferator activated receptor gamma	PPARG	P37231	TCMSP
niuxi	MOL000098	quercetin	Peroxisome proliferator activated receptor gamma	PPARG	P37231	TCMSP
niuxi	MOL000098	quercetin	Peroxisome proliferator-activated receptor alpha	PPARA	Q07869	TCMSP
niuxi	MOL000098	quercetin	Peroxisome proliferator-activated receptor delta	PPARD	Q03181	TCMSP
niuxi	MOL000422	kaempferol	Peroxisome proliferator-activated receptor gamma	PPARG	P37231	TCMSP
niuxi	MOL000098	quercetin	Peroxisome proliferator-activated receptor gamma	PPARG	P37231	TCMSP
niuxi	MOL000098	quercetin	Phosphatidylinositol-3,4,5-trisphosphate 3-phosphatase and dual-specificity protein phosphatase PTEN	PTEN	P60484	TCMSP
niuxi	MOL000173	wogonin	Phosphatidylinositol-4,5-bisphosphate 3-kinase catalytic subunit, gamma isoform	PIK3CG	P48736	TCMSP
niuxi	MOL002714	baicalein	Phosphatidylinositol-4,5-bisphosphate 3-kinase catalytic subunit, gamma isoform	PIK3CG	P48736	TCMSP
niuxi	MOL000358	beta-sitosterol	Phosphatidylinositol-4,5-bisphosphate 3-kinase catalytic subunit, gamma isoform	PIK3CG	P48736	TCMSP
niuxi	MOL000422	kaempferol	Phosphatidylinositol-4,5-bisphosphate 3-kinase catalytic subunit, gamma isoform	PIK3CG	P48736	TCMSP
niuxi	MOL000098	quercetin	Phosphatidylinositol-4,5-bisphosphate 3-kinase catalytic subunit, gamma isoform	PIK3CG	P48736	TCMSP
niuxi	MOL000098	quercetin	Plasminogen activator inhibitor 1	SERPINE1	P05121	TCMSP
niuxi	MOL000098	quercetin	Poly [ADP-ribose] polymerase 1	PARP1	P09874	TCMSP
niuxi	MOL001454	berberine	Potassium voltage-gated channel subfamily H member 2	KCNH2	Q12809	TCMSP
niuxi	MOL001458	coptisine	Potassium voltage-gated channel subfamily H member 2	KCNH2	Q12809	TCMSP
niuxi	MOL002897	epiberberine	Potassium voltage-gated channel subfamily H member 2	KCNH2	Q12809	TCMSP
niuxi	MOL000358	beta-sitosterol	Potassium voltage-gated channel subfamily H member 2	KCNH2	Q12809	TCMSP
niuxi	MOL000785	palmatine	Potassium voltage-gated channel subfamily H member 2	KCNH2	Q12809	TCMSP
niuxi	MOL000098	quercetin	Potassium voltage-gated channel subfamily H member 2	KCNH2	Q12809	TCMSP
niuxi	MOL000098	quercetin	Probable E3 ubiquitin-protein ligase HERC5	HERC5	Q9UII4	TCMSP
niuxi	MOL000098	quercetin	Procollagen C-endopeptidase enhancer 1	PCOLCE	Q15113	TCMSP
niuxi	MOL000098	quercetin	Pro-epidermal growth factor	EGF	P01133	TCMSP
niuxi	MOL001006	poriferasta-7,22E-dien-3beta-ol	Progesterone receptor	PGR	P06401	TCMSP
niuxi	MOL012461	28-norolean-17-en-3-ol	Progesterone receptor	PGR	P06401	TCMSP
niuxi	MOL002643	delta 7-stigmastenol	Progesterone receptor	PGR	P06401	TCMSP
niuxi	MOL000358	beta-sitosterol	Progesterone receptor	PGR	P06401	TCMSP
niuxi	MOL000422	kaempferol	Progesterone receptor	PGR	P06401	TCMSP
niuxi	MOL004355	Spinasterol	Progesterone receptor	PGR	P06401	TCMSP
niuxi	MOL000449	Stigmasterol	Progesterone receptor	PGR	P06401	TCMSP
niuxi	MOL000085	beta-daucosterol	Progesterone receptor	PGR	P06401	TCMSP
niuxi	MOL000173	wogonin	Prostaglandin E2 receptor EP3 subtype	PTGER3	P43115	TCMSP
niuxi	MOL000098	quercetin	Prostaglandin E2 receptor EP3 subtype	PTGER3	P43115	TCMSP
niuxi	MOL001454	berberine	Prostaglandin G/H synthase 1	PTGS1	P23219	TCMSP
niuxi	MOL001458	coptisine	Prostaglandin G/H synthase 1	PTGS1	P23219	TCMSP
niuxi	MOL000173	wogonin	Prostaglandin G/H synthase 1	PTGS1	P23219	TCMSP
niuxi	MOL002714	baicalein	Prostaglandin G/H synthase 1	PTGS1	P23219	TCMSP
niuxi	MOL000358	beta-sitosterol	Prostaglandin G/H synthase 1	PTGS1	P23219	TCMSP
niuxi	MOL003847	Inophyllum E	Prostaglandin G/H synthase 1	PTGS1	P23219	TCMSP
niuxi	MOL000422	kaempferol	Prostaglandin G/H synthase 1	PTGS1	P23219	TCMSP
niuxi	MOL000449	Stigmasterol	Prostaglandin G/H synthase 1	PTGS1	P23219	TCMSP
niuxi	MOL000785	palmatine	Prostaglandin G/H synthase 1	PTGS1	P23219	TCMSP
niuxi	MOL000098	quercetin	Prostaglandin G/H synthase 1	PTGS1	P23219	TCMSP
niuxi	MOL001454	berberine	Prostaglandin G/H synthase 2	PTGS2	P35354	TCMSP
niuxi	MOL001458	coptisine	Prostaglandin G/H synthase 2	PTGS2	P35354	TCMSP
niuxi	MOL000173	wogonin	Prostaglandin G/H synthase 2	PTGS2	P35354	TCMSP
niuxi	MOL002714	baicalein	Prostaglandin G/H synthase 2	PTGS2	P35354	TCMSP
niuxi	MOL002897	epiberberine	Prostaglandin G/H synthase 2	PTGS2	P35354	TCMSP
niuxi	MOL000358	beta-sitosterol	Prostaglandin G/H synthase 2	PTGS2	P35354	TCMSP
niuxi	MOL003847	Inophyllum E	Prostaglandin G/H synthase 2	PTGS2	P35354	TCMSP
niuxi	MOL000422	kaempferol	Prostaglandin G/H synthase 2	PTGS2	P35354	TCMSP
niuxi	MOL000449	Stigmasterol	Prostaglandin G/H synthase 2	PTGS2	P35354	TCMSP
niuxi	MOL000785	palmatine	Prostaglandin G/H synthase 2	PTGS2	P35354	TCMSP
niuxi	MOL000098	quercetin	Prostaglandin G/H synthase 2	PTGS2	P35354	TCMSP
niuxi	MOL000098	quercetin	Prostatic acid phosphatase	ACPP	P15309	TCMSP
niuxi	MOL000098	quercetin	Protein CBFA2T1	RUNX1T1	Q06455	TCMSP
niuxi	MOL000098	quercetin	Protein kinase C alpha type	PRKCD	Q05655	TCMSP
niuxi	MOL000098	quercetin	Protein kinase C beta type	PRKCD	Q05655	TCMSP
niuxi	MOL000173	wogonin	Protein kinase C delta type	PRKCD	Q05655	TCMSP
niuxi	MOL002714	baicalein	Proto-oncogene c-Fos	FOS	P01100	TCMSP
niuxi	MOL000098	quercetin	Proto-oncogene c-Fos	FOS	P01100	TCMSP
niuxi	MOL003847	Inophyllum E	Proto-oncogene serine/threonine-protein kinase Pim-1	PIM1	P11309	TCMSP
niuxi	MOL000785	palmatine	Proto-oncogene serine/threonine-protein kinase Pim-1	PIM1	P11309	TCMSP
niuxi	MOL000098	quercetin	Puromycin-sensitive aminopeptidase	NPEPPS	P55786	TCMSP
niuxi	MOL000173	wogonin	RAC-alpha serine/threonine-protein kinase	AKT1	P31749	TCMSP
niuxi	MOL002714	baicalein	RAC-alpha serine/threonine-protein kinase	AKT1	P31749	TCMSP
niuxi	MOL000422	kaempferol	RAC-alpha serine/threonine-protein kinase	AKT1	P31749	TCMSP
niuxi	MOL000098	quercetin	RAC-alpha serine/threonine-protein kinase	AKT1	P31749	TCMSP
niuxi	MOL000098	quercetin	RAF proto-oncogene serine/threonine-protein kinase	RAF1	P04049	TCMSP
niuxi	MOL000098	quercetin	Ras association domain-containing protein 1	RASSF1	Q9NS23	TCMSP
niuxi	MOL000098	quercetin	Ras GTPase-activating protein 1	RASA1	P20936	TCMSP
niuxi	MOL000098	quercetin	Receptor tyrosine-protein kinase erbB-2	ERBB2	P04626	TCMSP
niuxi	MOL000098	quercetin	Receptor tyrosine-protein kinase erbB-3	ERBB3	P21860	TCMSP
niuxi	MOL000098	quercetin	Retinoblastoma-associated protein	RB1	P06400	TCMSP
niuxi	MOL001454	berberine	Retinoic acid receptor RXR-alpha	RXRA	P19793	TCMSP
niuxi	MOL000173	wogonin	Retinoic acid receptor RXR-alpha	RXRA	P19793	TCMSP
niuxi	MOL002897	epiberberine	Retinoic acid receptor RXR-alpha	RXRA	P19793	TCMSP
niuxi	MOL000449	Stigmasterol	Retinoic acid receptor RXR-alpha	RXRA	P19793	TCMSP
niuxi	MOL000785	palmatine	Retinoic acid receptor RXR-alpha	RXRA	P19793	TCMSP
niuxi	MOL000098	quercetin	Retinoic acid receptor RXR-alpha	RXRA	P19793	TCMSP
niuxi	MOL000098	quercetin	Runt-related transcription factor 2	RUNX2	Q13950	TCMSP
niuxi	MOL000173	wogonin	Serine/threonine-protein kinase Chk1	CHEK1	O14757	TCMSP
niuxi	MOL000098	quercetin	Serine/threonine-protein kinase Chk2	CHEK2	O96017	TCMSP
niuxi	MOL000422	kaempferol	Serine/threonine-protein phosphatase 2B catalytic subunit alpha isoform	PPP3CA	Q08209	TCMSP
niuxi	MOL000098	quercetin	Serum paraoxonase/arylesterase 1	PON1	P27169	TCMSP
niuxi	MOL000422	kaempferol	Signal transducer and activator of transcription 1-alpha/beta	STAT1	P42224	TCMSP
niuxi	MOL000098	quercetin	Signal transducer and activator of transcription 1-alpha/beta	STAT1	P42224	TCMSP
niuxi	MOL001454	berberine	Sodium channel protein type 5 subunit alpha	SCN5A	Q14524	TCMSP
niuxi	MOL001458	coptisine	Sodium channel protein type 5 subunit alpha	SCN5A	Q14524	TCMSP
niuxi	MOL000173	wogonin	Sodium channel protein type 5 subunit alpha	SCN5A	Q14524	TCMSP
niuxi	MOL000449	Stigmasterol	Sodium channel protein type 5 subunit alpha	SCN5A	Q14524	TCMSP
niuxi	MOL000785	palmatine	Sodium channel protein type 5 subunit alpha	SCN5A	Q14524	TCMSP
niuxi	MOL000098	quercetin	Sodium channel protein type 5 subunit alpha	SCN5A	Q14524	TCMSP
niuxi	MOL000449	Stigmasterol	Sodium-dependent dopamine transporter	SLC6A3	Q01959	TCMSP
niuxi	MOL000422	kaempferol	Sodium-dependent noradrenaline transporter	SLC6A2	P23975	TCMSP
niuxi	MOL000449	Stigmasterol	Sodium-dependent noradrenaline transporter	SLC6A2	P23975	TCMSP
niuxi	MOL000422	kaempferol	Solute carrier family 2, facilitated glucose transporter member 4	SLC2A4	P14672	TCMSP
niuxi	MOL000098	quercetin	Solute carrier family 2, facilitated glucose transporter member 4	SLC2A4	P14672	TCMSP
niuxi	MOL000098	quercetin	Stromelysin-1	MMP3	P08254	TCMSP
niuxi	MOL000098	quercetin	Superoxide dismutase [Cu-Zn]	SOD1	P00441	TCMSP
niuxi	MOL000173	wogonin	Telomerase protein component 1	TEP1	Q99973	TCMSP
qianqianhuo	MOL000347	syringin	Alpha-1A adrenergic receptor	P35348	ADRA1A	TCMSP
qianqianhuo	MOL000519	coniferin	Alpha-1B adrenergic receptor	ADRA1B	P35368	TCMSP
qianqianhuo	MOL000347	syringin	Alpha-1B adrenergic receptor	ADRA1B	P35368	TCMSP
qianqianhuo	MOL000519	coniferin	Alpha-1D adrenergic receptor	ADRA1D	P25100	TCMSP
qianqianhuo	MOL000347	syringin	Alpha-2A adrenergic receptor	ADRA2A	P08913	TCMSP
qianqianhuo	MOL000347	syringin	Alpha-2B adrenergic receptor	ADRA2A	P08913	TCMSP
qianqianhuo	MOL000347	syringin	Amine oxidase [flavin-containing] B	MAOB	P27338	TCMSP
qianqianhuo	MOL000519	coniferin	Androgen receptor	AR	P10275	TCMSP
qianqianhuo	MOL000347	syringin	Beta-1 adrenergic receptor	ADRB1	P08588	TCMSP
qianqianhuo	MOL000519	coniferin	Beta-2 adrenergic receptor	ADRB2	P07550	TCMSP
qianqianhuo	MOL000347	syringin	Beta-2 adrenergic receptor	ADRB2	P07550	TCMSP
qianqianhuo	MOL000519	coniferin	Beta-lactamase	LACTB2	Q53H82	TCMSP
qianqianhuo	MOL000561	astragalin	Calmodulin	CALM1	P0DP23	TCMSP
qianqianhuo	MOL000347	syringin	cAMP-dependent protein kinase inhibitor alpha	PKIA	P61925	TCMSP
qianqianhuo	MOL000519	coniferin	Carbonic anhydrase II	CA II	Q6LD99	TCMSP
qianqianhuo	MOL000519	coniferin	Cell division protein kinase 2	CDK2	P24941	TCMSP
qianqianhuo	MOL000519	coniferin	CGMP-inhibited 3',5'-cyclic phosphodiesterase A	PDE3A	Q14432	TCMSP
qianqianhuo	MOL000561	astragalin	Coagulation factor VII	F7	P08709	TCMSP
qianqianhuo	MOL000561	astragalin	Coagulation factor Xa	F9	P00740	TCMSP
qianqianhuo	MOL000519	coniferin	Cyclin-A2	CCNA2	P20248	TCMSP
qianqianhuo	MOL000561	astragalin	Dipeptidyl peptidase IV	DPP4	P27487	TCMSP
qianqianhuo	MOL000519	coniferin	DNA topoisomerase II	TOP2B	Q02880	TCMSP
qianqianhuo	MOL000561	astragalin	DNA topoisomerase II	TOP2B	Q02880	TCMSP
qianqianhuo	MOL000519	coniferin	Estrogen receptor	ESR1	P03372	TCMSP
qianqianhuo	MOL000347	syringin	Gamma-aminobutyric acid receptor subunit alpha-1	GABRA1	P14867	TCMSP
qianqianhuo	MOL000561	astragalin	Heat shock protein HSP 90	HSP 90	P08238	TCMSP
qianqianhuo	MOL000519	coniferin	Ig gamma-1 chain C region	IGHG1	P01857	TCMSP
qianqianhuo	MOL000347	syringin	Leukotriene A-4 hydrolase	LTA4H	P09960	TCMSP
qianqianhuo	MOL000359	beta-sitosterol	Mineralocorticoid receptor	NR3C2	P08235	TCMSP
qianqianhuo	MOL000561	astragalin	mRNA of PKA Catalytic Subunit C-alpha	PRKACA	P17612	TCMSP
qianqianhuo	MOL000519	coniferin	Muscarinic acetylcholine receptor M1	CHRM1	P11229	TCMSP
qianqianhuo	MOL000347	syringin	Muscarinic acetylcholine receptor M1	CHRM1	P11229	TCMSP
qianqianhuo	MOL000347	syringin	Muscarinic acetylcholine receptor M2	CHRM2	P08172	TCMSP
qianqianhuo	MOL000519	coniferin	Muscarinic acetylcholine receptor M3	CHRM3	P20309	TCMSP
qianqianhuo	MOL000347	syringin	Muscarinic acetylcholine receptor M3	CHRM3	P20309	TCMSP
qianqianhuo	MOL000519	coniferin	Mu-type opioid receptor	OPRM1	P35372	TCMSP
qianqianhuo	MOL000519	coniferin	Neuronal acetylcholine receptor protein, alpha-7 chain	CHRNA7	P36544	TCMSP
qianqianhuo	MOL000561	astragalin	Nitric oxide synthase, inducible	NOS2	P35228	TCMSP
qianqianhuo	MOL000347	syringin	Nitric-oxide synthase, endothelial	NOS3	P29474	TCMSP
qianqianhuo	MOL000519	coniferin	Nuclear receptor coactivator 1	NCOA1	Q15788	TCMSP
qianqianhuo	MOL000359	beta-sitosterol	Nuclear receptor coactivator 2	NCoA-2	Q15596	TCMSP
qianqianhuo	MOL000519	coniferin	Nuclear receptor coactivator 2	NCoA-2	Q15596	TCMSP
qianqianhuo	MOL000561	astragalin	Nuclear receptor coactivator 2	NCoA-2	Q15596	TCMSP
qianqianhuo	MOL000519	coniferin	Peroxisome proliferator activated receptor gamma	PPARG	P37231	TCMSP
qianqianhuo	MOL000561	astragalin	Phosphatidylinositol-4,5-bisphosphate 3-kinase catalytic subunit, gamma isoform	PIK3CG	P48736	TCMSP
qianqianhuo	MOL000561	astragalin	Potassium voltage-gated channel subfamily H member 2	KCNH2	Q12809	TCMSP
qianqianhuo	MOL000359	beta-sitosterol	Progesterone receptor	PGR	P06401	TCMSP
qianqianhuo	MOL010585	Daucosterol_qt	Progesterone receptor	PGR	P06401	TCMSP
qianqianhuo	MOL000561	astragalin	Prostaglandin G/H synthase 1	PTGS1	P23219	TCMSP
qianqianhuo	MOL000347	syringin	Prostaglandin G/H synthase 1	PTGS1	P23219	TCMSP
qianqianhuo	MOL000519	coniferin	Prostaglandin G/H synthase 2	PTGS2	P35354	TCMSP
qianqianhuo	MOL000561	astragalin	Prostaglandin G/H synthase 2	PTGS2	P35354	TCMSP
qianqianhuo	MOL000347	syringin	Prostaglandin G/H synthase 2	PTGS2	P35354	TCMSP
qianqianhuo	MOL000519	coniferin	Proto-oncogene serine/threonine-protein kinase Pim-1	PIM1	P11309	TCMSP
qianqianhuo	MOL000519	coniferin	Sodium channel protein type 5 subunit alpha	SCN5A	Q14524	TCMSP
qianqianhuo	MOL000347	syringin	Sodium-dependent dopamine transporter	SLC6A3	Q01959	TCMSP
qianqianhuo	MOL000347	syringin	Sodium-dependent noradrenaline transporter	SLC6A2	P23975	TCMSP
tongcao	MOL000359	sitosterol	Mineralocorticoid receptor	NR3C2	P08235	TCMSP
tongcao	MOL000359	sitosterol	Nuclear receptor coactivator 2	NCoA-2	Q15596	TCMSP
tongcao	MOL000359	sitosterol	Progesterone receptor	PGR	P06401	TCMSP
xudan	MOL003152	Gentisin	Aldose reductase		DrugBank	TCMSP
xudan	MOL003152	Gentisin	cAMP-dependent protein kinase inhibitor alpha	PKIA	P61925	TCMSP
xudan	MOL003152	Gentisin	Cell division protein kinase 2	CDK2	P24941	TCMSP
xudan	MOL003152	Gentisin	Dipeptidyl peptidase IV	DPP4	P27487	TCMSP
xudan	MOL000358	beta-sitosterol	Dopamine D1 receptor	DRD1	P21728	TCMSP
xudan	MOL003152	Gentisin	Estrogen receptor beta	ESR1	P03372	TCMSP
xudan	MOL003152	Gentisin	Glycogen synthase kinase-3 beta	GSK3B	P49841	TCMSP
xudan	MOL003152	Gentisin	Heat shock protein HSP 90	HSP 90	P08238	TCMSP
xudan	MOL000358	beta-sitosterol	Heat shock protein HSP 90	HSP 90	P08238	TCMSP
xudan	MOL000358	beta-sitosterol	Mineralocorticoid receptor	NR3C2	P08235	TCMSP
xudan	MOL000359	sitosterol	Mineralocorticoid receptor	NR3C2	P08235	TCMSP
xudan	MOL003152	Gentisin	Mitogen-activated protein kinase 14	MAPK14	Q16539	TCMSP
xudan	MOL003152	Gentisin	mRNA of PKA Catalytic Subunit C-alpha	PRKACA	P17612	TCMSP
xudan	MOL000358	beta-sitosterol	mRNA of PKA Catalytic Subunit C-alpha	PRKACA	P17612	TCMSP
xudan	MOL000358	beta-sitosterol	Muscarinic acetylcholine receptor M3	CHRM3	P20309	TCMSP
xudan	MOL003152	Gentisin	Nitric oxide synthase, inducible	NOS2	P35228	TCMSP
xudan	MOL000358	beta-sitosterol	Nuclear receptor coactivator 2	NCoA-2	Q15596	TCMSP
xudan	MOL000359	sitosterol	Nuclear receptor coactivator 2	NCoA-2	Q15596	TCMSP
xudan	MOL000359	sitosterol	Nuclear receptor coactivator 2	NCoA-2	Q15596	TCMSP
xudan	MOL003152	Gentisin	Phosphatidylinositol-4,5-bisphosphate 3-kinase catalytic subunit, gamma isoform	PIK3CG	P48736	TCMSP
xudan	MOL000358	beta-sitosterol	Phosphatidylinositol-4,5-bisphosphate 3-kinase catalytic subunit, gamma isoform	PIK3CG	P48736	TCMSP
xudan	MOL000358	beta-sitosterol	Potassium voltage-gated channel subfamily H member 2	KCNH2	Q12809	TCMSP
xudan	MOL000358	beta-sitosterol	Progesterone receptor	PGR	P06401	TCMSP
xudan	MOL000359	sitosterol	Progesterone receptor	PGR	P06401	TCMSP
xudan	MOL003152	Gentisin	Prostaglandin G/H synthase 1	PTGS1	P23219	TCMSP
xudan	MOL000358	beta-sitosterol	Prostaglandin G/H synthase 1	PTGS1	P23219	TCMSP
xudan	MOL003152	Gentisin	Prostaglandin G/H synthase 2	PTGS2	P35354	TCMSP
xudan	MOL000358	beta-sitosterol	Prostaglandin G/H synthase 2	PTGS2	P35354	TCMSP
xudan	MOL003152	Gentisin	Serine/threonine-protein kinase Chk1	CHEK1	O14757	TCMSP
zelan	MOL000296	hederagenin	Alcohol dehydrogenase 1B	ADH1B	P00325	TCMSP
zelan	MOL000296	hederagenin	Alcohol dehydrogenase 1C	ADH1B	P00325	TCMSP
zelan	MOL000296	hederagenin	Alpha-1B adrenergic receptor	ADRA1B	P35368	TCMSP
zelan	MOL000296	hederagenin	CGMP-inhibited 3',5'-cyclic phosphodiesterase A	PDE3A	Q14432	TCMSP
zelan	MOL000296	hederagenin	Cytochrome P450-cam	CYP55A1	P23295	TCMSP
zelan	MOL000358	beta-sitosterol	Dopamine D1 receptor	DRD1	P21728	TCMSP
zelan	MOL000296	hederagenin	Gamma-aminobutyric acid receptor subunit alpha-1	GABRA1	P14867	TCMSP
zelan	MOL000296	hederagenin	Gamma-aminobutyric-acid receptor alpha-2 subunit	GABRA2	P47869	TCMSP
zelan	MOL000296	hederagenin	Gamma-aminobutyric-acid receptor alpha-3 subunit	GABRA2	P47869	TCMSP
zelan	MOL000296	hederagenin	Gamma-aminobutyric-acid receptor alpha-5 subunit	GABRA2	P47869	TCMSP
zelan	MOL000296	hederagenin	Gamma-aminobutyric-acid receptor subunit alpha-6	GABRA2	P47869	TCMSP
zelan	MOL000296	hederagenin	Glutamate receptor 2	GRIA2	P42262	TCMSP
zelan	MOL000358	beta-sitosterol	Heat shock protein HSP 90	HSP 90	P08238	TCMSP
zelan	MOL000296	hederagenin	Ig gamma-1 chain C region	IGHG1	P01857	TCMSP
zelan	MOL000296	hederagenin	Lysozyme	LYZ	P61626	TCMSP
zelan	MOL000358	beta-sitosterol	mRNA of PKA Catalytic Subunit C-alpha	PRKACA	P17612	TCMSP
zelan	MOL000296	hederagenin	Muscarinic acetylcholine receptor M1	CHRM1	P11229	TCMSP
zelan	MOL000296	hederagenin	Muscarinic acetylcholine receptor M2	CHRM2	P08172	TCMSP
zelan	MOL000296	hederagenin	Muscarinic acetylcholine receptor M3	CHRM3	P20309	TCMSP
zelan	MOL000358	beta-sitosterol	Muscarinic acetylcholine receptor M3	CHRM3	P20309	TCMSP
zelan	MOL000296	hederagenin	Nuclear receptor coactivator 2	NCoA-2	Q15596	TCMSP
zelan	MOL000358	beta-sitosterol	Nuclear receptor coactivator 2	NCoA-2	Q15596	TCMSP
zelan	MOL000358	beta-sitosterol	Phosphatidylinositol-4,5-bisphosphate 3-kinase catalytic subunit, gamma isoform	PIK3CG	P48736	TCMSP
zelan	MOL000358	beta-sitosterol	Potassium voltage-gated channel subfamily H member 2	KCNH2	Q12809	TCMSP
zelan	MOL000296	hederagenin	Progesterone receptor	PGR	P06401	TCMSP
zelan	MOL000358	beta-sitosterol	Progesterone receptor	PGR	P06401	TCMSP
zelan	MOL000296	hederagenin	Prostaglandin G/H synthase 1	PTGS1	P23219	TCMSP
zelan	MOL000358	beta-sitosterol	Prostaglandin G/H synthase 1	PTGS1	P23219	TCMSP
zelan	MOL000296	hederagenin	Prostaglandin G/H synthase 2	PTGS2	P35354	TCMSP
zelan	MOL000358	beta-sitosterol	Prostaglandin G/H synthase 2	PTGS2	P35354	TCMSP
zelan	MOL000296	hederagenin	Retinoic acid receptor RXR-alpha	RXRA	P19793	TCMSP
zelan	MOL000296	hederagenin	Sodium channel protein type 5 subunit alpha	SCN5A	Q14524	TCMSP
zelan	MOL000296	hederagenin	Sodium-dependent noradrenaline transporter	SLC6A2	P23975	TCMSP
baimaogen	MOL000358	beta-sitosterol	Androgen Receptor	AR	P10275	SwissTargetPrediction
baimaogen	MOL000358	beta-sitosterol	HMG-CoA reductase	HMGCR	P04035	SwissTargetPrediction
baimaogen	MOL000358	beta-sitosterol	Cytochrome P450 51 (by homology)	CYP51A1	Q16850	SwissTargetPrediction
baimaogen	MOL000358	beta-sitosterol	Niemann-Pick C1-like protein 1	NPC1L1	Q9UHC9	SwissTargetPrediction
baimaogen	MOL000358	beta-sitosterol	LXR-alpha	NR1H3	Q13133	SwissTargetPrediction
baimaogen	MOL000358	beta-sitosterol	Cytochrome P450 19A1	CYP19A1	P11511	SwissTargetPrediction
baimaogen	MOL000358	beta-sitosterol	Nuclear receptor ROR-gamma	RORC	P51449	SwissTargetPrediction
baimaogen	MOL000358	beta-sitosterol	Sterol regulatory element-binding protein 2	SREBF2	Q12772	SwissTargetPrediction
baimaogen	MOL000358	beta-sitosterol	Estrogen receptor alpha	ESR1	P03372	SwissTargetPrediction
baimaogen	MOL000358	beta-sitosterol	Estrogen receptor beta	ESR2	Q92731	SwissTargetPrediction
baimaogen	MOL000358	beta-sitosterol	Testis-specific androgen-binding protein	SHBG	P04278	SwissTargetPrediction
baimaogen	MOL000358	beta-sitosterol	Cytochrome P450 17A1	CYP17A1	P05093	SwissTargetPrediction
baimaogen	MOL000358	beta-sitosterol	Norepinephrine transporter	SLC6A2	P23975	SwissTargetPrediction
baimaogen	MOL000358	beta-sitosterol	Muscarinic acetylcholine receptor M2	CHRM2	P08172	SwissTargetPrediction
baimaogen	MOL000358	beta-sitosterol	Acetylcholinesterase	ACHE	P22303	SwissTargetPrediction
baimaogen	MOL000358	beta-sitosterol	Serotonin transporter	SLC6A4	P31645	SwissTargetPrediction
baimaogen	MOL000358	beta-sitosterol	Cytochrome P450 2C19	CYP2C19	P33261	SwissTargetPrediction
baimaogen	MOL000358	beta-sitosterol	Nuclear receptor ROR-alpha	RORA	P35398	SwissTargetPrediction
baimaogen	MOL000358	beta-sitosterol	Protein-tyrosine phosphatase 1B	PTPN1	P18031	SwissTargetPrediction
baimaogen	MOL000358	beta-sitosterol	Butyrylcholinesterase	BCHE	P06276	SwissTargetPrediction
baimaogen	MOL000358	beta-sitosterol	Corticosteroid binding globulin	SERPINA6	P08185	SwissTargetPrediction
baimaogen	MOL000358	beta-sitosterol	Glucose-6-phosphate 1-dehydrogenase	G6PD	P11413	SwissTargetPrediction
baimaogen	MOL000358	beta-sitosterol	Nuclear receptor subfamily 1 group I member 3 (by homology)	NR1I3	Q14994	SwissTargetPrediction
baimaogen	MOL000358	beta-sitosterol	Vitamin D receptor	VDR	P11473	SwissTargetPrediction
baimaogen	MOL000358	beta-sitosterol	LXR-beta	NR1H2	P55055	SwissTargetPrediction
baimaogen	MOL000358	beta-sitosterol	Glycine receptor subunit alpha-1	GLRA1	P23415	SwissTargetPrediction
baimaogen	MOL000358	beta-sitosterol	Carboxylesterase 2	CES2	O00748	SwissTargetPrediction
baimaogen	MOL000358	beta-sitosterol	Prostanoid EP1 receptor (by homology)	PTGER1	P34995	SwissTargetPrediction
baimaogen	MOL000358	beta-sitosterol	Prostanoid EP2 receptor (by homology)	PTGER2	P43116	SwissTargetPrediction
baimaogen	MOL000358	beta-sitosterol	11-beta-hydroxysteroid dehydrogenase 1	HSD11B1	P28845	SwissTargetPrediction
baimaogen	MOL000358	beta-sitosterol	Thromboxane-A synthase	TBXAS1	P24557	SwissTargetPrediction
baimaogen	MOL000358	beta-sitosterol	Prostaglandin E synthase	PTGES	O14684	SwissTargetPrediction
baimaogen	MOL000358	beta-sitosterol	Dual specificity phosphatase Cdc25A	CDC25A	P30304	SwissTargetPrediction
baimaogen	MOL000358	beta-sitosterol	Peroxisome proliferator-activated receptor alpha	PPARA	Q07869	SwissTargetPrediction
baimaogen	MOL000358	beta-sitosterol	Peroxisome proliferator-activated receptor delta	PPARD	Q03181	SwissTargetPrediction
baimaogen	MOL000358	beta-sitosterol	Anti-estrogen binding site (AEBS) (by homology)	DHCR7	Q9UBM7	SwissTargetPrediction
baimaogen	MOL000358	beta-sitosterol	Glucocorticoid receptor	NR3C1	P04150	SwissTargetPrediction
baimaogen	MOL000358	beta-sitosterol	Sigma opioid receptor	SIGMAR1	Q99720	SwissTargetPrediction
baimaogen	MOL000358	beta-sitosterol	Squalene monooxygenase	SQLE	Q14534	SwissTargetPrediction
baimaogen	MOL000358	beta-sitosterol	Dual specificity phosphatase Cdc25B	CDC25B	P30305	SwissTargetPrediction
baimaogen	MOL000358	beta-sitosterol	Protein-tyrosine phosphatase 1C	PTPN6	P29350	SwissTargetPrediction
baimaogen	MOL000358	beta-sitosterol	T-cell protein-tyrosine phosphatase	PTPN2	P17706	SwissTargetPrediction
baimaogen	MOL000358	beta-sitosterol	Nitric oxide synthase, inducible (by homology)	NOS2	P35228	SwissTargetPrediction
baimaogen	MOL000358	beta-sitosterol	Squalene synthetase (by homology)	FDFT1	P37268	SwissTargetPrediction
baimaogen	MOL000358	beta-sitosterol	11-beta-hydroxysteroid dehydrogenase 2	HSD11B2	P80365	SwissTargetPrediction
baimaogen	MOL000358	beta-sitosterol	Cannabinoid receptor 2	CNR2	P34972	SwissTargetPrediction
baimaogen	MOL000358	beta-sitosterol	Cannabinoid receptor 1 (by homology)	CNR1	P21554	SwissTargetPrediction
baimaogen	MOL000358	beta-sitosterol	Sonic hedgehog protein (by homology)	SHH	Q15465	SwissTargetPrediction
baimaogen	MOL000358	beta-sitosterol	Peroxisome proliferator-activated receptor gamma	PPARG	P37231	SwissTargetPrediction
baimaogen	MOL000358	beta-sitosterol	UDP-glucuronosyltransferase 2B7	UGT2B7	P16662	SwissTargetPrediction
baimaogen	MOL000358	beta-sitosterol	DNA polymerase beta (by homology)	POLB	P06746	SwissTargetPrediction
baimaogen	MOL001870	LUTEOLINIDIN	Lymphocyte differentiation antigen CD38	CD38	P28907	SwissTargetPrediction
baimaogen	MOL001870	LUTEOLINIDIN	NAD-dependent deacetylase sirtuin 1	SIRT1	Q96EB6	SwissTargetPrediction
baimaogen	MOL001870	LUTEOLINIDIN	Cyclooxygenase-1	PTGS1	P23219	SwissTargetPrediction
baimaogen	MOL001870	LUTEOLINIDIN	Phosphodiesterase 4B	PDE4B	Q07343	SwissTargetPrediction
baimaogen	MOL001870	LUTEOLINIDIN	Phosphodiesterase 4D	PDE4D	Q08499	SwissTargetPrediction
baimaogen	MOL001870	LUTEOLINIDIN	Thrombin	F2	P00734	SwissTargetPrediction
baimaogen	MOL001870	LUTEOLINIDIN	Glyoxalase I	GLO1	Q04760	SwissTargetPrediction
baimaogen	MOL001870	LUTEOLINIDIN	LXR-alpha	NR1H3	Q13133	SwissTargetPrediction
baimaogen	MOL001870	LUTEOLINIDIN	Receptor-type tyrosine-protein phosphatase S	PTPRS	Q13332	SwissTargetPrediction
baimaogen	MOL001870	LUTEOLINIDIN	NADPH oxidase 4	NOX4	Q9NPH5	SwissTargetPrediction
baimaogen	MOL001870	LUTEOLINIDIN	Aldose reductase	AKR1B1	P15121	SwissTargetPrediction
baimaogen	MOL001870	LUTEOLINIDIN	Cyclin-dependent kinase 5/CDK5 activator 1	CDK5R1 CDK5	Q15078 Q00535	SwissTargetPrediction
baimaogen	MOL001870	LUTEOLINIDIN	Xanthine dehydrogenase	XDH	P47989	SwissTargetPrediction
baimaogen	MOL001870	LUTEOLINIDIN	Monoamine oxidase A	MAOA	P21397	SwissTargetPrediction
baimaogen	MOL001870	LUTEOLINIDIN	Tyrosine-protein kinase receptor FLT3	FLT3	P36888	SwissTargetPrediction
baimaogen	MOL001870	LUTEOLINIDIN	Carbonic anhydrase II	CA2	P00918	SwissTargetPrediction
baimaogen	MOL001870	LUTEOLINIDIN	Cyclin-dependent kinase 1/cyclin B	CCNB3 CDK1 CCNB1 CCNB2	Q8WWL7 P06493 P14635 O95067	SwissTargetPrediction
baimaogen	MOL001870	LUTEOLINIDIN	Arachidonate 5-lipoxygenase	ALOX5	P09917	SwissTargetPrediction
baimaogen	MOL001870	LUTEOLINIDIN	Carbonic anhydrase VII	CA7	P43166	SwissTargetPrediction
baimaogen	MOL001870	LUTEOLINIDIN	Beta amyloid A4 protein	APP	P05067	SwissTargetPrediction
baimaogen	MOL001870	LUTEOLINIDIN	Tyrosine-protein kinase SYK	SYK	P43405	SwissTargetPrediction
baimaogen	MOL001870	LUTEOLINIDIN	Glycogen synthase kinase-3 beta	GSK3B	P49841	SwissTargetPrediction
baimaogen	MOL001870	LUTEOLINIDIN	Poly [ADP-ribose] polymerase-1	PARP1	P09874	SwissTargetPrediction
baimaogen	MOL001870	LUTEOLINIDIN	Transthyretin	TTR	P02766	SwissTargetPrediction
baimaogen	MOL001870	LUTEOLINIDIN	Matrix metalloproteinase 9	MMP9	P14780	SwissTargetPrediction
baimaogen	MOL001870	LUTEOLINIDIN	Carbonic anhydrase XII	CA12	O43570	SwissTargetPrediction
baimaogen	MOL001870	LUTEOLINIDIN	Matrix metalloproteinase 2	MMP2	P08253	SwissTargetPrediction
baimaogen	MOL001870	LUTEOLINIDIN	Carbonic anhydrase IV	CA4	P22748	SwissTargetPrediction
baimaogen	MOL001870	LUTEOLINIDIN	Matrix metalloproteinase 12	MMP12	P39900	SwissTargetPrediction
baimaogen	MOL001870	LUTEOLINIDIN	Cytochrome P450 1B1	CYP1B1	Q16678	SwissTargetPrediction
baimaogen	MOL001870	LUTEOLINIDIN	ATP-binding cassette sub-family G member 2	ABCG2	Q9UNQ0	SwissTargetPrediction
baimaogen	MOL001870	LUTEOLINIDIN	Aldo-keto reductase family 1 member B10	AKR1B10	O60218	SwissTargetPrediction
baimaogen	MOL001870	LUTEOLINIDIN	Tankyrase-2	TNKS2	Q9H2K2	SwissTargetPrediction
baimaogen	MOL001870	LUTEOLINIDIN	Tankyrase-1	TNKS	O95271	SwissTargetPrediction
baimaogen	MOL001870	LUTEOLINIDIN	DNA topoisomerase I (by homology)	TOP1	P11387	SwissTargetPrediction
baimaogen	MOL001870	LUTEOLINIDIN	Adenosine A1 receptor (by homology)	ADORA1	P30542	SwissTargetPrediction
baimaogen	MOL001870	LUTEOLINIDIN	Arginase-1 (by homology)	ARG1	P05089	SwissTargetPrediction
baimaogen	MOL001870	LUTEOLINIDIN	Testis-specific androgen-binding protein	SHBG	P04278	SwissTargetPrediction
baimaogen	MOL001870	LUTEOLINIDIN	Multidrug resistance-associated protein 1	ABCC1	P33527	SwissTargetPrediction
baimaogen	MOL001870	LUTEOLINIDIN	Beta-galactoside alpha-2,6-sialyltransferase 1	ST6GAL1	P15907	SwissTargetPrediction
baimaogen	MOL001870	LUTEOLINIDIN	Estrogen receptor alpha	ESR1	P03372	SwissTargetPrediction
baimaogen	MOL001870	LUTEOLINIDIN	Estrogen receptor beta	ESR2	Q92731	SwissTargetPrediction
baimaogen	MOL001870	LUTEOLINIDIN	Cytochrome P450 19A1	CYP19A1	P11511	SwissTargetPrediction
baimaogen	MOL001870	LUTEOLINIDIN	Acetylcholinesterase	ACHE	P22303	SwissTargetPrediction
baimaogen	MOL001870	LUTEOLINIDIN	Cyclooxygenase-2	PTGS2	P35354	SwissTargetPrediction
baimaogen	MOL001870	LUTEOLINIDIN	Cyclin-dependent kinase 6	CDK6	Q00534	SwissTargetPrediction
baimaogen	MOL001870	LUTEOLINIDIN	Estradiol 17-beta-dehydrogenase 1	HSD17B1	P14061	SwissTargetPrediction
baimaogen	MOL001870	LUTEOLINIDIN	Casein kinase II alpha	CSNK2A1	P68400	SwissTargetPrediction
baimaogen	MOL001870	LUTEOLINIDIN	Cystic fibrosis transmembrane conductance regulator	CFTR	P13569	SwissTargetPrediction
baimaogen	MOL001870	LUTEOLINIDIN	Adenosine A2a receptor (by homology)	ADORA2A	P29274	SwissTargetPrediction
baimaogen	MOL001870	LUTEOLINIDIN	Plasminogen	PLG	P00747	SwissTargetPrediction
baimaogen	MOL001870	LUTEOLINIDIN	AMY1C	AMY1A	P04745	SwissTargetPrediction
baimaogen	MOL001870	LUTEOLINIDIN	G protein-coupled receptor kinase 6	GRK6	P43250	SwissTargetPrediction
baimaogen	MOL001870	LUTEOLINIDIN	Telomerase reverse transcriptase	TERT	O14746	SwissTargetPrediction
baimaogen	MOL001870	LUTEOLINIDIN	Androgen Receptor	AR	P10275	SwissTargetPrediction
baimaogen	MOL001870	LUTEOLINIDIN	Microtubule-associated protein tau	MAPT	P10636	SwissTargetPrediction
baimaogen	MOL001870	LUTEOLINIDIN	Lysine-specific demethylase 4D-like	KDM4E	B2RXH2	SwissTargetPrediction
baimaogen	MOL001870	LUTEOLINIDIN	G-protein coupled receptor 35	GPR35	Q9HC97	SwissTargetPrediction
baimaogen	MOL001870	LUTEOLINIDIN	Vasopressin V2 receptor	AVPR2	P30518	SwissTargetPrediction
baimaogen	MOL001870	LUTEOLINIDIN	DNA topoisomerase II alpha	TOP2A	P11388	SwissTargetPrediction
baimaogen	MOL001870	LUTEOLINIDIN	Insulin-like growth factor I receptor	IGF1R	P08069	SwissTargetPrediction
baimaogen	MOL001870	LUTEOLINIDIN	Insulin receptor	INSR	P06213	SwissTargetPrediction
baimaogen	MOL001870	LUTEOLINIDIN	Epidermal growth factor receptor erbB1	EGFR	P00533	SwissTargetPrediction
baimaogen	MOL001870	LUTEOLINIDIN	Serine/threonine-protein kinase PIM1	PIM1	P11309	SwissTargetPrediction
baimaogen	MOL001870	LUTEOLINIDIN	Serine/threonine-protein kinase Aurora-B	AURKB	Q96GD4	SwissTargetPrediction
baimaogen	MOL001870	LUTEOLINIDIN	Dopamine D4 receptor	DRD4	P21917	SwissTargetPrediction
baimaogen	MOL001870	LUTEOLINIDIN	Myosin light chain kinase, smooth muscle	MYLK	Q15746	SwissTargetPrediction
baimaogen	MOL001870	LUTEOLINIDIN	Myeloperoxidase	MPO	P05164	SwissTargetPrediction
baimaogen	MOL001870	LUTEOLINIDIN	PI3-kinase p85-alpha subunit	PIK3R1	P27986	SwissTargetPrediction
baimaogen	MOL001870	LUTEOLINIDIN	Death-associated protein kinase 1	DAPK1	P53355	SwissTargetPrediction
baimaogen	MOL001870	LUTEOLINIDIN	Liver glycogen phosphorylase	PYGL	P06737	SwissTargetPrediction
baimaogen	MOL001870	LUTEOLINIDIN	Carbonic anhydrase I	CA1	P00915	SwissTargetPrediction
baimaogen	MOL001870	LUTEOLINIDIN	Tyrosine-protein kinase SRC	SRC	P12931	SwissTargetPrediction
baimaogen	MOL001870	LUTEOLINIDIN	Focal adhesion kinase 1	PTK2	Q05397	SwissTargetPrediction
baimaogen	MOL001870	LUTEOLINIDIN	Estradiol 17-beta-dehydrogenase 2	HSD17B2	P37059	SwissTargetPrediction
baimaogen	MOL001870	LUTEOLINIDIN	Vascular endothelial growth factor receptor 2	KDR	P35968	SwissTargetPrediction
baimaogen	MOL001870	LUTEOLINIDIN	Matrix metalloproteinase 13	MMP13	P45452	SwissTargetPrediction
baimaogen	MOL001870	LUTEOLINIDIN	Matrix metalloproteinase 3	MMP3	P08254	SwissTargetPrediction
baimaogen	MOL001870	LUTEOLINIDIN	Carbonic anhydrase III	CA3	P07451	SwissTargetPrediction
baimaogen	MOL001870	LUTEOLINIDIN	Arachidonate 15-lipoxygenase	ALOX15	P16050	SwissTargetPrediction
baimaogen	MOL001870	LUTEOLINIDIN	Serine/threonine-protein kinase PLK1	PLK1	P53350	SwissTargetPrediction
baimaogen	MOL001870	LUTEOLINIDIN	Carbonic anhydrase VI	CA6	P23280	SwissTargetPrediction
baimaogen	MOL001870	LUTEOLINIDIN	Cyclin-dependent kinase 1	CDK1	P06493	SwissTargetPrediction
baimaogen	MOL001870	LUTEOLINIDIN	PI3-kinase p110-gamma subunit	PIK3CG	P48736	SwissTargetPrediction
baimaogen	MOL001870	LUTEOLINIDIN	Protein kinase N1	PKN1	Q16512	SwissTargetPrediction
baimaogen	MOL001870	LUTEOLINIDIN	Carbonic anhydrase XIV	CA14	Q9ULX7	SwissTargetPrediction
baimaogen	MOL001870	LUTEOLINIDIN	Carbonic anhydrase IX	CA9	Q16790	SwissTargetPrediction
baimaogen	MOL001870	LUTEOLINIDIN	Arachidonate 12-lipoxygenase	ALOX12	P18054	SwissTargetPrediction
baimaogen	MOL001870	LUTEOLINIDIN	Hepatocyte growth factor receptor	MET	P08581	SwissTargetPrediction
baimaogen	MOL001870	LUTEOLINIDIN	Serine/threonine-protein kinase NEK2	NEK2	P51955	SwissTargetPrediction
baimaogen	MOL001870	LUTEOLINIDIN	Interleukin-8 receptor A	CXCR1	P25024	SwissTargetPrediction
baimaogen	MOL001870	LUTEOLINIDIN	CaM kinase II beta	CAMK2B	Q13554	SwissTargetPrediction
baimaogen	MOL001870	LUTEOLINIDIN	ALK tyrosine kinase receptor	ALK	Q9UM73	SwissTargetPrediction
baimaogen	MOL001870	LUTEOLINIDIN	Serine/threonine-protein kinase AKT	AKT1	P31749	SwissTargetPrediction
baimaogen	MOL001870	LUTEOLINIDIN	P-glycoprotein 1	ABCB1	P08183	SwissTargetPrediction
baimaogen	MOL001870	LUTEOLINIDIN	Serine/threonine-protein kinase NEK6	NEK6	Q9HC98	SwissTargetPrediction
baimaogen	MOL001870	LUTEOLINIDIN	Phospholipase A2 group 1B	PLA2G1B	P04054	SwissTargetPrediction
baimaogen	MOL001870	LUTEOLINIDIN	Carbonic anhydrase VA	CA5A	P35218	SwissTargetPrediction
baimaogen	MOL001870	LUTEOLINIDIN	Beta-secretase 1	BACE1	P56817	SwissTargetPrediction
baimaogen	MOL001870	LUTEOLINIDIN	Tyrosine-protein kinase receptor UFO	AXL	P30530	SwissTargetPrediction
baimaogen	MOL000387	Bifendate	Glycogen synthase kinase-3 beta	GSK3B	P49841	SwissTargetPrediction
baimaogen	MOL000387	Bifendate	Tyrosine-protein kinase SYK	SYK	P43405	SwissTargetPrediction
baimaogen	MOL000387	Bifendate	Epidermal growth factor receptor erbB1	EGFR	P00533	SwissTargetPrediction
baimaogen	MOL000387	Bifendate	Oxytocin receptor	OXTR	P30559	SwissTargetPrediction
baimaogen	MOL000387	Bifendate	Tyrosine-protein kinase JAK3	JAK3	P52333	SwissTargetPrediction
baimaogen	MOL000387	Bifendate	Focal adhesion kinase 1	PTK2	Q05397	SwissTargetPrediction
baimaogen	MOL000387	Bifendate	Thrombin	F2	P00734	SwissTargetPrediction
baimaogen	MOL000387	Bifendate	ATP-binding cassette sub-family G member 2	ABCG2	Q9UNQ0	SwissTargetPrediction
baimaogen	MOL000387	Bifendate	Vasopressin V2 receptor	AVPR2	P30518	SwissTargetPrediction
baimaogen	MOL000387	Bifendate	Vasopressin V1a receptor	AVPR1A	P37288	SwissTargetPrediction
baimaogen	MOL000387	Bifendate	Chymase	CMA1	P23946	SwissTargetPrediction
baimaogen	MOL000387	Bifendate	Cathepsin G	CTSG	P08311	SwissTargetPrediction
baimaogen	MOL000387	Bifendate	Proto-oncogene c-JUN	JUN	P05412	SwissTargetPrediction
baimaogen	MOL000387	Bifendate	Heat shock protein HSP 90-beta	HSP90AB1	P08238	SwissTargetPrediction
baimaogen	MOL000387	Bifendate	Phosphodiesterase 8B	PDE8B	O95263	SwissTargetPrediction
baimaogen	MOL000449	Stigmasterol	Androgen Receptor	AR	P10275	SwissTargetPrediction
baimaogen	MOL000449	Stigmasterol	Niemann-Pick C1-like protein 1	NPC1L1	Q9UHC9	SwissTargetPrediction
baimaogen	MOL000449	Stigmasterol	HMG-CoA reductase	HMGCR	P04035	SwissTargetPrediction
baimaogen	MOL000449	Stigmasterol	Cytochrome P450 51 (by homology)	CYP51A1	Q16850	SwissTargetPrediction
baimaogen	MOL000449	Stigmasterol	Cytochrome P450 19A1	CYP19A1	P11511	SwissTargetPrediction
baimaogen	MOL000449	Stigmasterol	LXR-alpha	NR1H3	Q13133	SwissTargetPrediction
baimaogen	MOL000449	Stigmasterol	Cytochrome P450 17A1	CYP17A1	P05093	SwissTargetPrediction
baimaogen	MOL000449	Stigmasterol	Nuclear receptor ROR-gamma	RORC	P51449	SwissTargetPrediction
baimaogen	MOL000449	Stigmasterol	Sterol regulatory element-binding protein 2	SREBF2	Q12772	SwissTargetPrediction
baimaogen	MOL000449	Stigmasterol	Estrogen receptor alpha	ESR1	P03372	SwissTargetPrediction
baimaogen	MOL000449	Stigmasterol	Estrogen receptor beta	ESR2	Q92731	SwissTargetPrediction
baimaogen	MOL000449	Stigmasterol	Testis-specific androgen-binding protein	SHBG	P04278	SwissTargetPrediction
baimaogen	MOL000449	Stigmasterol	Muscarinic acetylcholine receptor M2	CHRM2	P08172	SwissTargetPrediction
baimaogen	MOL000449	Stigmasterol	Acetylcholinesterase	ACHE	P22303	SwissTargetPrediction
baimaogen	MOL000449	Stigmasterol	Norepinephrine transporter	SLC6A2	P23975	SwissTargetPrediction
baimaogen	MOL000449	Stigmasterol	Serotonin transporter	SLC6A4	P31645	SwissTargetPrediction
baimaogen	MOL000449	Stigmasterol	Cytochrome P450 2C19	CYP2C19	P33261	SwissTargetPrediction
baimaogen	MOL000449	Stigmasterol	Nuclear receptor ROR-alpha	RORA	P35398	SwissTargetPrediction
baimaogen	MOL000449	Stigmasterol	Protein-tyrosine phosphatase 1B	PTPN1	P18031	SwissTargetPrediction
baimaogen	MOL000449	Stigmasterol	Butyrylcholinesterase	BCHE	P06276	SwissTargetPrediction
baimaogen	MOL000449	Stigmasterol	Corticosteroid binding globulin	SERPINA6	P08185	SwissTargetPrediction
baimaogen	MOL000449	Stigmasterol	Glucose-6-phosphate 1-dehydrogenase	G6PD	P11413	SwissTargetPrediction
baimaogen	MOL000449	Stigmasterol	Nuclear receptor subfamily 1 group I member 3 (by homology)	NR1I3	Q14994	SwissTargetPrediction
baimaogen	MOL000449	Stigmasterol	LXR-beta	NR1H2	P55055	SwissTargetPrediction
baimaogen	MOL000449	Stigmasterol	Vitamin D receptor	VDR	P11473	SwissTargetPrediction
baimaogen	MOL000449	Stigmasterol	11-beta-hydroxysteroid dehydrogenase 1	HSD11B1	P28845	SwissTargetPrediction
baimaogen	MOL000449	Stigmasterol	Prostanoid EP1 receptor (by homology)	PTGER1	P34995	SwissTargetPrediction
baimaogen	MOL000449	Stigmasterol	Prostanoid EP2 receptor (by homology)	PTGER2	P43116	SwissTargetPrediction
baimaogen	MOL000449	Stigmasterol	Dual specificity phosphatase Cdc25A	CDC25A	P30304	SwissTargetPrediction
baimaogen	MOL000449	Stigmasterol	Glycine receptor subunit alpha-1	GLRA1	P23415	SwissTargetPrediction
baimaogen	MOL000449	Stigmasterol	Carboxylesterase 2	CES2	O00748	SwissTargetPrediction
baimaogen	MOL000449	Stigmasterol	Thromboxane-A synthase	TBXAS1	P24557	SwissTargetPrediction
baimaogen	MOL000449	Stigmasterol	Prostaglandin E synthase	PTGES	O14684	SwissTargetPrediction
baimaogen	MOL000449	Stigmasterol	Peroxisome proliferator-activated receptor alpha	PPARA	Q07869	SwissTargetPrediction
baimaogen	MOL000449	Stigmasterol	Peroxisome proliferator-activated receptor delta	PPARD	Q03181	SwissTargetPrediction
baimaogen	MOL000449	Stigmasterol	Glucocorticoid receptor	NR3C1	P04150	SwissTargetPrediction
baimaogen	MOL000449	Stigmasterol	Sigma opioid receptor	SIGMAR1	Q99720	SwissTargetPrediction
baimaogen	MOL000449	Stigmasterol	Dual specificity phosphatase Cdc25B	CDC25B	P30305	SwissTargetPrediction
baimaogen	MOL000449	Stigmasterol	Squalene monooxygenase	SQLE	Q14534	SwissTargetPrediction
baimaogen	MOL000449	Stigmasterol	Anti-estrogen binding site (AEBS) (by homology)	DHCR7	Q9UBM7	SwissTargetPrediction
baimaogen	MOL000449	Stigmasterol	11-beta-hydroxysteroid dehydrogenase 2	HSD11B2	P80365	SwissTargetPrediction
baimaogen	MOL000449	Stigmasterol	Protein-tyrosine phosphatase 1C	PTPN6	P29350	SwissTargetPrediction
baimaogen	MOL000449	Stigmasterol	T-cell protein-tyrosine phosphatase	PTPN2	P17706	SwissTargetPrediction
baimaogen	MOL000449	Stigmasterol	Nitric oxide synthase, inducible (by homology)	NOS2	P35228	SwissTargetPrediction
baimaogen	MOL000449	Stigmasterol	Cannabinoid receptor 2	CNR2	P34972	SwissTargetPrediction
baimaogen	MOL000449	Stigmasterol	Cannabinoid receptor 1 (by homology)	CNR1	P21554	SwissTargetPrediction
baimaogen	MOL000449	Stigmasterol	Squalene synthetase (by homology)	FDFT1	P37268	SwissTargetPrediction
baimaogen	MOL000449	Stigmasterol	Sonic hedgehog protein (by homology)	SHH	Q15465	SwissTargetPrediction
baimaogen	MOL000449	Stigmasterol	Peroxisome proliferator-activated receptor gamma	PPARG	P37231	SwissTargetPrediction
baimaogen	MOL000449	Stigmasterol	UDP-glucuronosyltransferase 2B7	UGT2B7	P16662	SwissTargetPrediction
baimaogen	MOL000449	Stigmasterol	Beta-secretase 1	BACE1	P56817	SwissTargetPrediction
baimaogen	MOL000449	Stigmasterol	DNA polymerase beta (by homology)	POLB	P06746	SwissTargetPrediction
baimaogen	MOL001876	6-Methoxyflavone	ATP-binding cassette sub-family G member 2	ABCG2	Q9UNQ0	SwissTargetPrediction
baimaogen	MOL001876	6-Methoxyflavone	Tankyrase-1	TNKS	O95271	SwissTargetPrediction
baimaogen	MOL001876	6-Methoxyflavone	Cytochrome P450 19A1	CYP19A1	P11511	SwissTargetPrediction
baimaogen	MOL001876	6-Methoxyflavone	Multidrug resistance-associated protein 1	ABCC1	P33527	SwissTargetPrediction
baimaogen	MOL001876	6-Methoxyflavone	Cytochrome P450 1B1	CYP1B1	Q16678	SwissTargetPrediction
baimaogen	MOL001876	6-Methoxyflavone	Calmodulin	CALM1	P62158	SwissTargetPrediction
baimaogen	MOL001876	6-Methoxyflavone	Tyrosine-protein kinase receptor FLT3	FLT3	P36888	SwissTargetPrediction
baimaogen	MOL001876	6-Methoxyflavone	Carbonic anhydrase II	CA2	P00918	SwissTargetPrediction
baimaogen	MOL001876	6-Methoxyflavone	Carbonic anhydrase I	CA1	P00915	SwissTargetPrediction
baimaogen	MOL001876	6-Methoxyflavone	Aldose reductase (by homology)	AKR1B1	P15121	SwissTargetPrediction
baimaogen	MOL001876	6-Methoxyflavone	Dopamine D2 receptor	DRD2	P14416	SwissTargetPrediction
baimaogen	MOL001876	6-Methoxyflavone	Sigma opioid receptor	SIGMAR1	Q99720	SwissTargetPrediction
baimaogen	MOL001876	6-Methoxyflavone	Carbonic anhydrase XII	CA12	O43570	SwissTargetPrediction
baimaogen	MOL001876	6-Methoxyflavone	Carbonic anhydrase IX	CA9	Q16790	SwissTargetPrediction
baimaogen	MOL001876	6-Methoxyflavone	Adenosine A1 receptor	ADORA1	P30542	SwissTargetPrediction
baimaogen	MOL001876	6-Methoxyflavone	Adenosine A2a receptor	ADORA2A	P29274	SwissTargetPrediction
baimaogen	MOL001876	6-Methoxyflavone	Monoamine oxidase B	MAOB	P27338	SwissTargetPrediction
baimaogen	MOL001876	6-Methoxyflavone	Cytochrome P450 1A1	CYP1A1	P04798	SwissTargetPrediction
baimaogen	MOL001876	6-Methoxyflavone	Cytochrome P450 1A2	CYP1A2	P05177	SwissTargetPrediction
baimaogen	MOL001876	6-Methoxyflavone	Poly [ADP-ribose] polymerase-1	PARP1	P09874	SwissTargetPrediction
baimaogen	MOL001876	6-Methoxyflavone	Receptor-type tyrosine-protein phosphatase S	PTPRS	Q13332	SwissTargetPrediction
baimaogen	MOL001876	6-Methoxyflavone	Serine/threonine-protein kinase PIM1	PIM1	P11309	SwissTargetPrediction
baimaogen	MOL001876	6-Methoxyflavone	Cyclooxygenase-2	PTGS2	P35354	SwissTargetPrediction
baimaogen	MOL001876	6-Methoxyflavone	Tankyrase-2	TNKS2	Q9H2K2	SwissTargetPrediction
baimaogen	MOL001876	6-Methoxyflavone	Beta amyloid A4 protein	APP	P05067	SwissTargetPrediction
baimaogen	MOL001876	6-Methoxyflavone	Stem cell growth factor receptor	KIT	P10721	SwissTargetPrediction
baimaogen	MOL001876	6-Methoxyflavone	Delta opioid receptor	OPRD1	P41143	SwissTargetPrediction
baimaogen	MOL001876	6-Methoxyflavone	Adenosine A3 receptor	ADORA3	P0DMS8	SwissTargetPrediction
baimaogen	MOL001876	6-Methoxyflavone	P-glycoprotein 1	ABCB1	P08183	SwissTargetPrediction
baimaogen	MOL001876	6-Methoxyflavone	Carbonic anhydrase IV	CA4	P22748	SwissTargetPrediction
baimaogen	MOL001876	6-Methoxyflavone	Estrogen receptor beta	ESR2	Q92731	SwissTargetPrediction
baimaogen	MOL001876	6-Methoxyflavone	Tyrosine-protein kinase LCK	LCK	P06239	SwissTargetPrediction
baimaogen	MOL001876	6-Methoxyflavone	Monoamine oxidase A	MAOA	P21397	SwissTargetPrediction
baimaogen	MOL001876	6-Methoxyflavone	Thromboxane-A synthase	TBXAS1	P24557	SwissTargetPrediction
baimaogen	MOL001876	6-Methoxyflavone	Estradiol 17-beta-dehydrogenase 1	HSD17B1	P14061	SwissTargetPrediction
baimaogen	MOL001876	6-Methoxyflavone	Aldo-keto reductase family 1 member B10	AKR1B10	O60218	SwissTargetPrediction
baimaogen	MOL001876	6-Methoxyflavone	Phosphodiesterase 5A	PDE5A	O76074	SwissTargetPrediction
baimaogen	MOL001876	6-Methoxyflavone	Tyrosine-protein kinase FYN	FYN	P06241	SwissTargetPrediction
baimaogen	MOL001876	6-Methoxyflavone	Neurokinin 2 receptor	TACR2	P21452	SwissTargetPrediction
baimaogen	MOL001876	6-Methoxyflavone	DNA-dependent protein kinase	PRKDC	P78527	SwissTargetPrediction
baimaogen	MOL001876	6-Methoxyflavone	MAP kinase ERK1	MAPK3	P27361	SwissTargetPrediction
baimaogen	MOL001876	6-Methoxyflavone	Cyclin-dependent kinase 1	CDK1	P06493	SwissTargetPrediction
baimaogen	MOL001876	6-Methoxyflavone	Cyclin-dependent kinase 5/CDK5 activator 1	CDK5R1 CDK5	Q15078 Q00535	SwissTargetPrediction
baimaogen	MOL001876	6-Methoxyflavone	Cyclin-dependent kinase 1/cyclin B	CCNB3 CDK1 CCNB1 CCNB2	Q8WWL7 P06493 P14635 O95067	SwissTargetPrediction
baimaogen	MOL001876	6-Methoxyflavone	Lysine-specific demethylase 4D-like	KDM4E	B2RXH2	SwissTargetPrediction
baimaogen	MOL001876	6-Methoxyflavone	Xanthine dehydrogenase	XDH	P47989	SwissTargetPrediction
baimaogen	MOL001876	6-Methoxyflavone	Arachidonate 15-lipoxygenase	ALOX15	P16050	SwissTargetPrediction
baimaogen	MOL001876	6-Methoxyflavone	Arachidonate 12-lipoxygenase	ALOX12	P18054	SwissTargetPrediction
baimaogen	MOL001876	6-Methoxyflavone	G protein-coupled receptor kinase 6	GRK6	P43250	SwissTargetPrediction
baimaogen	MOL001876	6-Methoxyflavone	Arachidonate 5-lipoxygenase	ALOX5	P09917	SwissTargetPrediction
baimaogen	MOL001876	6-Methoxyflavone	Phospholipase A2 group IIA	PLA2G2A	P14555	SwissTargetPrediction
baimaogen	MOL001876	6-Methoxyflavone	Cytosolic phospholipase A2	PLA2G4A	P47712	SwissTargetPrediction
baimaogen	MOL001876	6-Methoxyflavone	Carbonic anhydrase VII	CA7	P43166	SwissTargetPrediction
baimaogen	MOL001876	6-Methoxyflavone	Cyclin-dependent kinase 6	CDK6	Q00534	SwissTargetPrediction
baimaogen	MOL001876	6-Methoxyflavone	Beta-galactoside alpha-2,6-sialyltransferase 1	ST6GAL1	P15907	SwissTargetPrediction
baimaogen	MOL001876	6-Methoxyflavone	Carbonyl reductase [NADPH] 1	CBR1	P16152	SwissTargetPrediction
baimaogen	MOL001876	6-Methoxyflavone	Tyrosine-protein kinase SYK	SYK	P43405	SwissTargetPrediction
baimaogen	MOL001876	6-Methoxyflavone	Transthyretin	TTR	P02766	SwissTargetPrediction
baimaogen	MOL001876	6-Methoxyflavone	6-phosphofructo-2-kinase/fructose-2,6-bisphosphatase 3	PFKFB3	Q16875	SwissTargetPrediction
baimaogen	MOL001876	6-Methoxyflavone	Glycogen synthase kinase-3 beta	GSK3B	P49841	SwissTargetPrediction
baimaogen	MOL001876	6-Methoxyflavone	AMY1C	AMY1A	P04745	SwissTargetPrediction
baimaogen	MOL001876	6-Methoxyflavone	Inhibitor of nuclear factor kappa B kinase beta subunit	IKBKB	O14920	SwissTargetPrediction
baimaogen	MOL001876	6-Methoxyflavone	Neurotrophic tyrosine kinase receptor type 2	NTRK2	Q16620	SwissTargetPrediction
baimaogen	MOL001876	6-Methoxyflavone	Epidermal growth factor receptor erbB1	EGFR	P00533	SwissTargetPrediction
baimaogen	MOL001876	6-Methoxyflavone	Casein kinase II alpha	CSNK2A1	P68400	SwissTargetPrediction
baimaogen	MOL001876	6-Methoxyflavone	Acetylcholinesterase	ACHE	P22303	SwissTargetPrediction
baimaogen	MOL001876	6-Methoxyflavone	NADPH oxidase 4	NOX4	Q9NPH5	SwissTargetPrediction
baimaogen	MOL001876	6-Methoxyflavone	Estrogen receptor alpha	ESR1	P03372	SwissTargetPrediction
baimaogen	MOL001876	6-Methoxyflavone	Cystic fibrosis transmembrane conductance regulator	CFTR	P13569	SwissTargetPrediction
baimaogen	MOL001876	6-Methoxyflavone	Telomerase reverse transcriptase	TERT	O14746	SwissTargetPrediction
baimaogen	MOL001876	6-Methoxyflavone	Plasminogen	PLG	P00747	SwissTargetPrediction
baimaogen	MOL001876	6-Methoxyflavone	Cannabinoid receptor 2	CNR2	P34972	SwissTargetPrediction
baimaogen	MOL001876	6-Methoxyflavone	Cyclooxygenase-1	PTGS1	P23219	SwissTargetPrediction
baimaogen	MOL001876	6-Methoxyflavone	Dual specificity mitogen-activated protein kinase kinase 1	MAP2K1	Q02750	SwissTargetPrediction
baimaogen	MOL001876	6-Methoxyflavone	MAP kinase ERK2	MAPK1	P28482	SwissTargetPrediction
baimaogen	MOL001876	6-Methoxyflavone	Induced myeloid leukemia cell differentiation protein Mcl-1	MCL1	Q07820	SwissTargetPrediction
baimaogen	MOL001876	6-Methoxyflavone	Ornithine decarboxylase	ODC1	P11926	SwissTargetPrediction
baimaogen	MOL001876	6-Methoxyflavone	Butyrylcholinesterase	BCHE	P06276	SwissTargetPrediction
baimaogen	MOL001876	6-Methoxyflavone	Cyclin-dependent kinase 2	CDK2	P24941	SwissTargetPrediction
baimaogen	MOL001876	6-Methoxyflavone	Glyoxalase I	GLO1	Q04760	SwissTargetPrediction
baimaogen	MOL001876	6-Methoxyflavone	Matrix metalloproteinase 9	MMP9	P14780	SwissTargetPrediction
baimaogen	MOL001876	6-Methoxyflavone	Matrix metalloproteinase 2	MMP2	P08253	SwissTargetPrediction
baimaogen	MOL001876	6-Methoxyflavone	Matrix metalloproteinase 12	MMP12	P39900	SwissTargetPrediction
baimaogen	MOL001876	6-Methoxyflavone	Lymphocyte differentiation antigen CD38	CD38	P28907	SwissTargetPrediction
baimaogen	MOL001876	6-Methoxyflavone	DNA topoisomerase I (by homology)	TOP1	P11387	SwissTargetPrediction
baimaogen	MOL001876	6-Methoxyflavone	Arginase-1 (by homology)	ARG1	P05089	SwissTargetPrediction
baimaogen	MOL001876	6-Methoxyflavone	Mu opioid receptor (by homology)	OPRM1	P35372	SwissTargetPrediction
baimaogen	MOL001876	6-Methoxyflavone	Cytochrome P450 11B1	CYP11B1	P15538	SwissTargetPrediction
baimaogen	MOL001876	6-Methoxyflavone	Vascular endothelial growth factor receptor 1 (by homology)	FLT1	P17948	SwissTargetPrediction
baimaogen	MOL001876	6-Methoxyflavone	Cytochrome P450 11B2	CYP11B2	P19099	SwissTargetPrediction
baimaogen	MOL001876	6-Methoxyflavone	Steryl-sulfatase	STS	P08842	SwissTargetPrediction
baimaogen	MOL001876	6-Methoxyflavone	Nerve growth factor receptor Trk-A	NTRK1	P04629	SwissTargetPrediction
baimaogen	MOL001876	6-Methoxyflavone	Transient receptor potential cation channel subfamily M member 8 (by homology)	TRPM8	Q7Z2W7	SwissTargetPrediction
baimaogen	MOL001876	6-Methoxyflavone	Metabotropic glutamate receptor 5	GRM5	P41594	SwissTargetPrediction
baimaogen	MOL001876	6-Methoxyflavone	Metabotropic glutamate receptor 1	GRM1	Q13255	SwissTargetPrediction
baimaogen	MOL001876	6-Methoxyflavone	Tyrosinase	TYR	P14679	SwissTargetPrediction
baimaogen	MOL001876	6-Methoxyflavone	Estradiol 17-beta-dehydrogenase 2	HSD17B2	P37059	SwissTargetPrediction
baimaogen	MOL001876	6-Methoxyflavone	Aryl hydrocarbon receptor	AHR	P35869	SwissTargetPrediction
baishao	MOL000211	Mairin	DNA polymerase beta (by homology)	POLB	P06746	SwissTargetPrediction
baishao	MOL000211	Mairin	Aldo-keto reductase family 1 member B10	AKR1B10	O60218	SwissTargetPrediction
baishao	MOL000211	Mairin	SUMO-activating enzyme	SAE1 UBA2	Q9UBE0 Q9UBT2	SwissTargetPrediction
baishao	MOL000211	Mairin	11-beta-hydroxysteroid dehydrogenase 1	HSD11B1	P28845	SwissTargetPrediction
baishao	MOL000211	Mairin	Protein-tyrosine phosphatase 1B	PTPN1	P18031	SwissTargetPrediction
baishao	MOL000211	Mairin	Prostaglandin E synthase	PTGES	O14684	SwissTargetPrediction
baishao	MOL000211	Mairin	Bile acid receptor FXR	NR1H4	Q96RI1	SwissTargetPrediction
baishao	MOL000211	Mairin	T-cell protein-tyrosine phosphatase	PTPN2	P17706	SwissTargetPrediction
baishao	MOL000211	Mairin	DNA topoisomerase II alpha	TOP2A	P11388	SwissTargetPrediction
baishao	MOL000211	Mairin	Dual specificity phosphatase Cdc25C	CDC25C	P30307	SwissTargetPrediction
baishao	MOL000211	Mairin	Dual specificity phosphatase Cdc25A	CDC25A	P30304	SwissTargetPrediction
baishao	MOL000211	Mairin	G-protein coupled bile acid receptor 1	GPBAR1	Q8TDU6	SwissTargetPrediction
baishao	MOL000211	Mairin	Androgen Receptor (by homology)	AR	P10275	SwissTargetPrediction
baishao	MOL000211	Mairin	Carboxylesterase 2	CES2	O00748	SwissTargetPrediction
baishao	MOL000211	Mairin	Nuclear receptor ROR-gamma	RORC	P51449	SwissTargetPrediction
baishao	MOL000211	Mairin	Receptor-type tyrosine-protein phosphatase F (LAR)	PTPRF	P10586	SwissTargetPrediction
baishao	MOL000211	Mairin	Low molecular weight phosphotyrosine protein phosphatase	ACP1	P24666	SwissTargetPrediction
baishao	MOL000211	Mairin	Cyclooxygenase-2	PTGS2	P35354	SwissTargetPrediction
baishao	MOL000211	Mairin	Phospholipase A2 group 1B	PLA2G1B	P04054	SwissTargetPrediction
baishao	MOL000211	Mairin	Dual specificity phosphatase Cdc25B	CDC25B	P30305	SwissTargetPrediction
baishao	MOL000211	Mairin	Phosphodiesterase 4D	PDE4D	Q08499	SwissTargetPrediction
baishao	MOL000211	Mairin	Vitamin D receptor	VDR	P11473	SwissTargetPrediction
baishao	MOL000211	Mairin	Protein-tyrosine phosphatase 1C	PTPN6	P29350	SwissTargetPrediction
baishao	MOL000211	Mairin	LXR-alpha	NR1H3	Q13133	SwissTargetPrediction
baishao	MOL000211	Mairin	Fatty acid binding protein adipocyte	FABP4	P15090	SwissTargetPrediction
baishao	MOL000211	Mairin	Anandamide amidohydrolase	FAAH	O00519	SwissTargetPrediction
baishao	MOL000211	Mairin	Peroxisome proliferator-activated receptor gamma	PPARG	P37231	SwissTargetPrediction
baishao	MOL000211	Mairin	Peroxisome proliferator-activated receptor alpha	PPARA	Q07869	SwissTargetPrediction
baishao	MOL000211	Mairin	Telomerase reverse transcriptase	TERT	O14746	SwissTargetPrediction
baishao	MOL000211	Mairin	Fatty acid binding protein muscle	FABP3	P05413	SwissTargetPrediction
baishao	MOL000211	Mairin	Fatty acid binding protein epidermal	FABP5	Q01469	SwissTargetPrediction
baishao	MOL000211	Mairin	Peroxisome proliferator-activated receptor delta	PPARD	Q03181	SwissTargetPrediction
baishao	MOL000211	Mairin	Fatty acid-binding protein, liver	FABP1	P07148	SwissTargetPrediction
baishao	MOL000211	Mairin	Protein kinase C eta	PRKCH	P24723	SwissTargetPrediction
baishao	MOL000211	Mairin	11-beta-hydroxysteroid dehydrogenase 2	HSD11B2	P80365	SwissTargetPrediction
baishao	MOL000211	Mairin	Protein-tyrosine phosphatase 2C	PTPN11	Q06124	SwissTargetPrediction
baishao	MOL000211	Mairin	UDP-glucuronosyltransferase 2B7	UGT2B7	P16662	SwissTargetPrediction
baishao	MOL000211	Mairin	Acyl-CoA desaturase	SCD	O00767	SwissTargetPrediction
baishao	MOL000211	Mairin	Corticosteroid binding globulin	SERPINA6	P08185	SwissTargetPrediction
baishao	MOL000211	Mairin	Testis-specific androgen-binding protein	SHBG	P04278	SwissTargetPrediction
baishao	MOL000211	Mairin	HMG-CoA reductase	HMGCR	P04035	SwissTargetPrediction
baishao	MOL000211	Mairin	Glucose-6-phosphate 1-dehydrogenase	G6PD	P11413	SwissTargetPrediction
baishao	MOL000211	Mairin	Cytochrome P450 51 (by homology)	CYP51A1	Q16850	SwissTargetPrediction
baishao	MOL000211	Mairin	5-lipoxygenase activating protein	ALOX5AP	P20292	SwissTargetPrediction
baishao	MOL000211	Mairin	Cytochrome P450 19A1	CYP19A1	P11511	SwissTargetPrediction
baishao	MOL000211	Mairin	Estradiol 17-beta-dehydrogenase 3	HSD17B3	P37058	SwissTargetPrediction
baishao	MOL000211	Mairin	GABA-B receptor (by homology)	GABBR1	Q9UBS5	SwissTargetPrediction
baishao	MOL000211	Mairin	CD81 antigen	CD81	P60033	SwissTargetPrediction
baishao	MOL000211	Mairin	Prolyl endopeptidase	PREP	P48147	SwissTargetPrediction
baishao	MOL000211	Mairin	Protein farnesyltransferase	FNTA FNTB	P49354 P49356	SwissTargetPrediction
baishao	MOL000211	Mairin	DNA topoisomerase I	TOP1	P11387	SwissTargetPrediction
baishao	MOL000211	Mairin	Niemann-Pick C1-like protein 1	NPC1L1	Q9UHC9	SwissTargetPrediction
baishao	MOL000211	Mairin	Glucocorticoid receptor	NR3C1	P04150	SwissTargetPrediction
baishao	MOL000211	Mairin	Estrogen receptor beta	ESR2	Q92731	SwissTargetPrediction
baishao	MOL000211	Mairin	Sigma opioid receptor	SIGMAR1	Q99720	SwissTargetPrediction
baishao	MOL000211	Mairin	Cytochrome P450 17A1	CYP17A1	P05093	SwissTargetPrediction
baishao	MOL000211	Mairin	Prostanoid EP1 receptor (by homology)	PTGER1	P34995	SwissTargetPrediction
baishao	MOL000211	Mairin	Prostanoid EP2 receptor (by homology)	PTGER2	P43116	SwissTargetPrediction
baishao	MOL000211	Mairin	GABA A receptor alpha-2/beta-2/gamma-2	GABRA2 GABRB2 GABRG2	P47869 P47870 P18507	SwissTargetPrediction
baishao	MOL000211	Mairin	Nitric oxide synthase, inducible (by homology)	NOS2	P35228	SwissTargetPrediction
baishao	MOL000211	Mairin	p53-binding protein Mdm-2	MDM2	Q00987	SwissTargetPrediction
baishao	MOL000211	Mairin	Toll-like receptor (TLR7/TLR9)	TLR9	Q9NR96	SwissTargetPrediction
baishao	MOL000211	Mairin	Dopamine transporter	SLC6A3	Q01959	SwissTargetPrediction
baishao	MOL000211	Mairin	Adenosine A3 receptor	ADORA3	P0DMS8	SwissTargetPrediction
baishao	MOL000211	Mairin	MAP kinase ERK1	MAPK3	P27361	SwissTargetPrediction
baishao	MOL000211	Mairin	Free fatty acid receptor 1	FFAR1	O14842	SwissTargetPrediction
baishao	MOL000211	Mairin	Fatty acid binding protein intestinal	FABP2	P12104	SwissTargetPrediction
baishao	MOL000211	Mairin	Thromboxane A2 receptor	TBXA2R	P21731	SwissTargetPrediction
baishao	MOL000211	Mairin	Prostanoid DP receptor	PTGDR	Q13258	SwissTargetPrediction
baishao	MOL000358	beta-sitosterol	Androgen Receptor	AR	P10275	SwissTargetPrediction
baishao	MOL000358	beta-sitosterol	HMG-CoA reductase	HMGCR	P04035	SwissTargetPrediction
baishao	MOL000358	beta-sitosterol	Cytochrome P450 51 (by homology)	CYP51A1	Q16850	SwissTargetPrediction
baishao	MOL000358	beta-sitosterol	Niemann-Pick C1-like protein 1	NPC1L1	Q9UHC9	SwissTargetPrediction
baishao	MOL000358	beta-sitosterol	LXR-alpha	NR1H3	Q13133	SwissTargetPrediction
baishao	MOL000358	beta-sitosterol	Cytochrome P450 19A1	CYP19A1	P11511	SwissTargetPrediction
baishao	MOL000358	beta-sitosterol	Nuclear receptor ROR-gamma	RORC	P51449	SwissTargetPrediction
baishao	MOL000358	beta-sitosterol	Sterol regulatory element-binding protein 2	SREBF2	Q12772	SwissTargetPrediction
baishao	MOL000358	beta-sitosterol	Estrogen receptor alpha	ESR1	P03372	SwissTargetPrediction
baishao	MOL000358	beta-sitosterol	Estrogen receptor beta	ESR2	Q92731	SwissTargetPrediction
baishao	MOL000358	beta-sitosterol	Testis-specific androgen-binding protein	SHBG	P04278	SwissTargetPrediction
baishao	MOL000358	beta-sitosterol	Cytochrome P450 17A1	CYP17A1	P05093	SwissTargetPrediction
baishao	MOL000358	beta-sitosterol	Norepinephrine transporter	SLC6A2	P23975	SwissTargetPrediction
baishao	MOL000358	beta-sitosterol	Muscarinic acetylcholine receptor M2	CHRM2	P08172	SwissTargetPrediction
baishao	MOL000358	beta-sitosterol	Acetylcholinesterase	ACHE	P22303	SwissTargetPrediction
baishao	MOL000358	beta-sitosterol	Serotonin transporter	SLC6A4	P31645	SwissTargetPrediction
baishao	MOL000358	beta-sitosterol	Cytochrome P450 2C19	CYP2C19	P33261	SwissTargetPrediction
baishao	MOL000358	beta-sitosterol	Nuclear receptor ROR-alpha	RORA	P35398	SwissTargetPrediction
baishao	MOL000358	beta-sitosterol	Protein-tyrosine phosphatase 1B	PTPN1	P18031	SwissTargetPrediction
baishao	MOL000358	beta-sitosterol	Butyrylcholinesterase	BCHE	P06276	SwissTargetPrediction
baishao	MOL000358	beta-sitosterol	Corticosteroid binding globulin	SERPINA6	P08185	SwissTargetPrediction
baishao	MOL000358	beta-sitosterol	Glucose-6-phosphate 1-dehydrogenase	G6PD	P11413	SwissTargetPrediction
baishao	MOL000358	beta-sitosterol	Nuclear receptor subfamily 1 group I member 3 (by homology)	NR1I3	Q14994	SwissTargetPrediction
baishao	MOL000358	beta-sitosterol	Vitamin D receptor	VDR	P11473	SwissTargetPrediction
baishao	MOL000358	beta-sitosterol	LXR-beta	NR1H2	P55055	SwissTargetPrediction
baishao	MOL000358	beta-sitosterol	Glycine receptor subunit alpha-1	GLRA1	P23415	SwissTargetPrediction
baishao	MOL000358	beta-sitosterol	Carboxylesterase 2	CES2	O00748	SwissTargetPrediction
baishao	MOL000358	beta-sitosterol	Prostanoid EP1 receptor (by homology)	PTGER1	P34995	SwissTargetPrediction
baishao	MOL000358	beta-sitosterol	Prostanoid EP2 receptor (by homology)	PTGER2	P43116	SwissTargetPrediction
baishao	MOL000358	beta-sitosterol	11-beta-hydroxysteroid dehydrogenase 1	HSD11B1	P28845	SwissTargetPrediction
baishao	MOL000358	beta-sitosterol	Thromboxane-A synthase	TBXAS1	P24557	SwissTargetPrediction
baishao	MOL000358	beta-sitosterol	Prostaglandin E synthase	PTGES	O14684	SwissTargetPrediction
baishao	MOL000358	beta-sitosterol	Dual specificity phosphatase Cdc25A	CDC25A	P30304	SwissTargetPrediction
baishao	MOL000358	beta-sitosterol	Peroxisome proliferator-activated receptor alpha	PPARA	Q07869	SwissTargetPrediction
baishao	MOL000358	beta-sitosterol	Peroxisome proliferator-activated receptor delta	PPARD	Q03181	SwissTargetPrediction
[truncated: 6,982 more rows]
