# Supplementary material for: Identifying Synergistic Mechanisms of Multiple Ingredients in Shuangbai Tablets against Proteinuria by Virtual Screening and a Network Pharmacology Approach
Source: Evid Based Complement Alternat Med. 2020 Jan 6;2020:1027271. doi: 10.1155/2020/1027271 (PMC6984745; doi:10.1155/2020/1027271)
Supplement: Supplementary Materials — Supplementary Table 1: 118 active ingredients in Shuangbai Tablets. Supplementary Table 2: 8981 targets of the active ingredients in Shuangbai Tablets. Supplementary Table 3: 110 523 genes associated with proteinuria. Supplementary Table 4: candidate targets with therapeutic proteinuria. Supplementary Table 5: 172 pairs of protein interactions of candidate targets. Supplementary Table 6: specific analytical parameters of 41 central targets. [file 1027271.f1.zip › 1027271.f1/Table 3-Proteinuria-related Genes.xlsx]

## Sheet: Sheet1
Database	Gene	Uniprot	Description	Update time	Download time
DrugBank	NR3C1	P04150	Glucocorticoid receptor	version 5.1.3, released 2019-04-02	April 13, 2019
DrugBank	ANXA1	P04083	Annexin A1	version 5.1.3, released 2019-04-02	April 13, 2019
DrugBank	HSD11B2	P80365	Corticosteroid 11-beta-dehydrogenase isozyme 2	version 5.1.3, released 2019-04-02	April 13, 2019
DrugBank	HSD3B1	P14060	3 beta-hydroxysteroid dehydrogenase/Delta 5-->4-isomerase type 1	version 5.1.3, released 2019-04-02	April 13, 2019
DrugBank	HSD11B1	P28845	Corticosteroid 11-beta-dehydrogenase isozyme 1	version 5.1.3, released 2019-04-02	April 13, 2019
DisGeNET	HAVCR1	Q96D42	hepatitis A virus cellular receptor 1	Last update: February 2019/UniProt release 2019_02	April 13, 2019
DisGeNET	AGTR1	P30556	angiotensin II receptor type 1	Last update: February 2019/UniProt release 2019_02	April 13, 2019
DisGeNET	TGFB1	P01137	transforming growth factor beta 1	Last update: February 2019/UniProt release 2019_02	April 13, 2019
DisGeNET	NPHS1	O60500	NPHS1, nephrin	Last update: February 2019/UniProt release 2019_02	April 13, 2019
DisGeNET	APOE	P02649	apolipoprotein E	Last update: February 2019/UniProt release 2019_02	April 13, 2019
DisGeNET	LMX1B	O60663	LIM homeobox transcription factor 1 beta	Last update: February 2019/UniProt release 2019_02	April 13, 2019
DisGeNET	HLA-DRB1	P01911	major histocompatibility complex, class II, DR beta 1	Last update: February 2019/UniProt release 2019_02	April 13, 2019
DisGeNET	NR4A1	P22736	nuclear receptor subfamily 4 group A member 1	Last update: February 2019/UniProt release 2019_02	April 13, 2019
DisGeNET	PAK1	Q13153	p21 (RAC1) activated kinase 1	Last update: February 2019/UniProt release 2019_02	April 13, 2019
DisGeNET	NCK2	O43639	NCK adaptor protein 2	Last update: February 2019/UniProt release 2019_02	April 13, 2019
DisGeNET	DPP4	P27487	dipeptidyl peptidase 4	Last update: February 2019/UniProt release 2019_02	April 13, 2019
DisGeNET	POMC	P01189	proopiomelanocortin	Last update: February 2019/UniProt release 2019_02	April 13, 2019
DisGeNET	DNASE1	P24855	deoxyribonuclease 1	Last update: February 2019/UniProt release 2019_02	April 13, 2019
DisGeNET	IL1RN	P18510	interleukin 1 receptor antagonist	Last update: February 2019/UniProt release 2019_02	April 13, 2019
DisGeNET	PPARA	Q07869	peroxisome proliferator activated receptor alpha	Last update: February 2019/UniProt release 2019_02	April 13, 2019
DisGeNET	PTGS2	P35354	prostaglandin-endoperoxide synthase 2	Last update: February 2019/UniProt release 2019_02	April 13, 2019
DisGeNET	NCK1	P16333	NCK adaptor protein 1	Last update: February 2019/UniProt release 2019_02	April 13, 2019
DisGeNET	MPV17	P39210	MPV17, mitochondrial inner membrane protein	Last update: February 2019/UniProt release 2019_02	April 13, 2019
DisGeNET	SOD1	P00441	superoxide dismutase 1	Last update: February 2019/UniProt release 2019_02	April 13, 2019
DisGeNET	IFNG	P01579	interferon gamma	Last update: February 2019/UniProt release 2019_02	April 13, 2019
DisGeNET	GUSB	P08236	glucuronidase beta	Last update: February 2019/UniProt release 2019_02	April 13, 2019
DisGeNET	HLA-B	P01889	major histocompatibility complex, class I, B	Last update: February 2019/UniProt release 2019_02	April 13, 2019
DisGeNET	LAMB2	P55268	laminin subunit beta 2	Last update: February 2019/UniProt release 2019_02	April 13, 2019
DisGeNET	HLA-DQA1	P01909	major histocompatibility complex, class II, DQ alpha 1	Last update: February 2019/UniProt release 2019_02	April 13, 2019
DisGeNET	LEP	P41159	leptin	Last update: February 2019/UniProt release 2019_02	April 13, 2019
DisGeNET	CYBB	P04839	cytochrome b-245 beta chain	Last update: February 2019/UniProt release 2019_02	April 13, 2019
DisGeNET	CTSL	P07711	cathepsin L	Last update: February 2019/UniProt release 2019_02	April 13, 2019
DisGeNET	CTSB	P07858	cathepsin B	Last update: February 2019/UniProt release 2019_02	April 13, 2019
DisGeNET	RHOA	P61586	ras homolog family member A	Last update: February 2019/UniProt release 2019_02	April 13, 2019
DisGeNET	VEGFA	P15692	vascular endothelial growth factor A	Last update: February 2019/UniProt release 2019_02	April 13, 2019
DisGeNET	FAS	P25445	Fas cell surface death receptor	Last update: February 2019/UniProt release 2019_02	April 13, 2019
DisGeNET	CLCN5	P51795	chloride voltage-gated channel 5	Last update: February 2019/UniProt release 2019_02	April 13, 2019
DisGeNET	MUC16	Q8WXI7	mucin 16, cell surface associated	Last update: February 2019/UniProt release 2019_02	April 13, 2019
DisGeNET	ALOX5AP	P20292	arachidonate 5-lipoxygenase activating protein	Last update: February 2019/UniProt release 2019_02	April 13, 2019
DisGeNET	SCNN1A	P37088	sodium channel epithelial 1 alpha subunit	Last update: February 2019/UniProt release 2019_02	April 13, 2019
DisGeNET	SPP1	P10451	secreted phosphoprotein 1	Last update: February 2019/UniProt release 2019_02	April 13, 2019
DisGeNET	ALB	P02768	albumin	Last update: February 2019/UniProt release 2019_02	April 13, 2019
DisGeNET	REN	P00797	renin	Last update: February 2019/UniProt release 2019_02	April 13, 2019
DisGeNET	AGT	P01019	angiotensinogen	Last update: February 2019/UniProt release 2019_02	April 13, 2019
DisGeNET	PAK2	Q13177	p21 (RAC1) activated kinase 2	Last update: February 2019/UniProt release 2019_02	April 13, 2019
DisGeNET	NPHS2	Q9NP85	NPHS2, podocin	Last update: February 2019/UniProt release 2019_02	April 13, 2019
DisGeNET	CFH	P08603	complement factor H	Last update: February 2019/UniProt release 2019_02	April 13, 2019
DisGeNET	SDC1	P18827	syndecan 1	Last update: February 2019/UniProt release 2019_02	April 13, 2019
DisGeNET	LEPR	P48357	leptin receptor	Last update: February 2019/UniProt release 2019_02	April 13, 2019
DisGeNET	RAB38	P57729	RAB38, member RAS oncogene family	Last update: February 2019/UniProt release 2019_02	April 13, 2019
DisGeNET	CD55	P08174	CD55 molecule (Cromer blood group)	Last update: February 2019/UniProt release 2019_02	April 13, 2019
DisGeNET	NCKAP5	O14513	NCK associated protein 5	Last update: February 2019/UniProt release 2019_02	April 13, 2019
DisGeNET	C6	P13671	complement C6	Last update: February 2019/UniProt release 2019_02	April 13, 2019
DisGeNET	ACE	P12821	angiotensin I converting enzyme	Last update: February 2019/UniProt release 2019_02	April 13, 2019
DisGeNET	TMEM163	Q8TC26	transmembrane protein 163	Last update: February 2019/UniProt release 2019_02	April 13, 2019
DisGeNET	SERPINA1	P01009	serpin family A member 1	Last update: February 2019/UniProt release 2019_02	April 13, 2019
DisGeNET	VTN	P04004	vitronectin	Last update: February 2019/UniProt release 2019_02	April 13, 2019
DisGeNET	NPPB	P16860	natriuretic peptide B	Last update: February 2019/UniProt release 2019_02	April 13, 2019
DisGeNET	CLU	P10909	clusterin	Last update: February 2019/UniProt release 2019_02	April 13, 2019
DisGeNET	NCF2	P19878	neutrophil cytosolic factor 2	Last update: February 2019/UniProt release 2019_02	April 13, 2019
DisGeNET	OPTN	Q96CV9	optineurin	Last update: February 2019/UniProt release 2019_02	April 13, 2019
DisGeNET	ICAM1	P05362	intercellular adhesion molecule 1	Last update: February 2019/UniProt release 2019_02	April 13, 2019
DisGeNET	MGAT5	Q09328	mannosyl (alpha-1,6-)-glycoprotein beta-1,6-N-acetyl-glucosaminyltransferase	Last update: February 2019/UniProt release 2019_02	April 13, 2019
DisGeNET	SNRPD1	P62314	small nuclear ribonucleoprotein D1 polypeptide	Last update: February 2019/UniProt release 2019_02	April 13, 2019
DisGeNET	CXCL10	P02778	C-X-C motif chemokine ligand 10	Last update: February 2019/UniProt release 2019_02	April 13, 2019
DisGeNET	ACTN4	O43707	actinin alpha 4	Last update: February 2019/UniProt release 2019_02	April 13, 2019
DisGeNET	ZAP70	P43403	zeta chain of T cell receptor associated protein kinase 70	Last update: February 2019/UniProt release 2019_02	April 13, 2019
DisGeNET	TACO1	Q9BSH4	translational activator of cytochrome c oxidase I	Last update: February 2019/UniProt release 2019_02	April 13, 2019
DisGeNET	COA7	Q96BR5	cytochrome c oxidase assembly factor 7 (putative)	Last update: February 2019/UniProt release 2019_02	April 13, 2019
DisGeNET	COX14	Q96I36	COX14, cytochrome c oxidase assembly factor	Last update: February 2019/UniProt release 2019_02	April 13, 2019
DisGeNET	VPS33A	Q96AX1	VPS33A, CORVET/HOPS core subunit	Last update: February 2019/UniProt release 2019_02	April 13, 2019
DisGeNET	CUBN	O60494	cubilin	Last update: February 2019/UniProt release 2019_02	April 13, 2019
DisGeNET	INF2	Q27J81	inverted formin, FH2 and WH2 domain containing	Last update: February 2019/UniProt release 2019_02	April 13, 2019
DisGeNET	LAGE3	Q14657	L antigen family member 3	Last update: February 2019/UniProt release 2019_02	April 13, 2019
DisGeNET	WDR19	Q8NEZ3	WD repeat domain 19	Last update: February 2019/UniProt release 2019_02	April 13, 2019
DisGeNET	NUP107	P57740	nucleoporin 107	Last update: February 2019/UniProt release 2019_02	April 13, 2019
DisGeNET	OFD1	O75665	OFD1, centriole and centriolar satellite protein	Last update: February 2019/UniProt release 2019_02	April 13, 2019
DisGeNET	PDSS2	Q86YH6	decaprenyl diphosphate synthase subunit 2	Last update: February 2019/UniProt release 2019_02	April 13, 2019
DisGeNET	COQ8B	Q96D53	coenzyme Q8B	Last update: February 2019/UniProt release 2019_02	April 13, 2019
DisGeNET	WT1	P19544	Wilms tumor 1	Last update: February 2019/UniProt release 2019_02	April 13, 2019
DisGeNET	COA5	Q86WW8	cytochrome c oxidase assembly factor 5	Last update: February 2019/UniProt release 2019_02	April 13, 2019
DisGeNET	HNF1B	P35680	HNF1 homeobox B	Last update: February 2019/UniProt release 2019_02	April 13, 2019
DisGeNET	COX20	Q5RI15	COX20, cytochrome c oxidase assembly factor	Last update: February 2019/UniProt release 2019_02	April 13, 2019
DisGeNET	TRPC6	Q9Y210	transient receptor potential cation channel subfamily C member 6	Last update: February 2019/UniProt release 2019_02	April 13, 2019
DisGeNET	TP53RK	Q96S44	TP53 regulating kinase	Last update: February 2019/UniProt release 2019_02	April 13, 2019
DisGeNET	WDR73	Q6P4I2	WD repeat domain 73	Last update: February 2019/UniProt release 2019_02	April 13, 2019
DisGeNET	APOPT1	Q96IL0	apoptogenic 1, mitochondrial	Last update: February 2019/UniProt release 2019_02	April 13, 2019
DisGeNET	VHL	P40337	von Hippel-Lindau tumor suppressor	Last update: February 2019/UniProt release 2019_02	April 13, 2019
DisGeNET	SLITRK6	Q9H5Y7	SLIT and NTRK like family member 6	Last update: February 2019/UniProt release 2019_02	April 13, 2019
DisGeNET	CLIP2	Q9UDT6	CAP-Gly domain containing linker protein 2	Last update: February 2019/UniProt release 2019_02	April 13, 2019
DisGeNET	AMN	Q9BXJ7	amnion associated transmembrane protein	Last update: February 2019/UniProt release 2019_02	April 13, 2019
DisGeNET	TMEM127	O75204	transmembrane protein 127	Last update: February 2019/UniProt release 2019_02	April 13, 2019
DisGeNET	ITGA8	P53708	integrin subunit alpha 8	Last update: February 2019/UniProt release 2019_02	April 13, 2019
DisGeNET	FASTKD2	Q9NYY8	FAST kinase domains 2	Last update: February 2019/UniProt release 2019_02	April 13, 2019
DisGeNET	FAN1	Q9Y2M0	FANCD2 and FANCI associated nuclease 1	Last update: February 2019/UniProt release 2019_02	April 13, 2019
DisGeNET	KIF1B	O60333	kinesin family member 1B	Last update: February 2019/UniProt release 2019_02	April 13, 2019
DisGeNET	COQ6	Q9Y2Z9	coenzyme Q6, monooxygenase	Last update: February 2019/UniProt release 2019_02	April 13, 2019
DisGeNET	CD2AP	Q9Y5K6	CD2 associated protein	Last update: February 2019/UniProt release 2019_02	April 13, 2019
DisGeNET	TPRKB	Q9Y3C4	TP53RK binding protein	Last update: February 2019/UniProt release 2019_02	April 13, 2019
DisGeNET	KCNE5	Q9UJ90	potassium voltage-gated channel subfamily E regulatory subunit 5	Last update: February 2019/UniProt release 2019_02	April 13, 2019
DisGeNET	SMARCAL1	Q9NZC9	SWI/SNF related, matrix associated, actin dependent regulator of chromatin, subfamily a like 1	Last update: February 2019/UniProt release 2019_02	April 13, 2019
DisGeNET	TBL2	Q9Y4P3	transducin beta like 2	Last update: February 2019/UniProt release 2019_02	April 13, 2019
DisGeNET	PTPN22	Q9Y2R2	protein tyrosine phosphatase, non-receptor type 22	Last update: February 2019/UniProt release 2019_02	April 13, 2019
DisGeNET	SH2B1	Q9NRF2	SH2B adaptor protein 1	Last update: February 2019/UniProt release 2019_02	April 13, 2019
DisGeNET	PLCE1	Q9P212	phospholipase C epsilon 1	Last update: February 2019/UniProt release 2019_02	April 13, 2019
DisGeNET	TREX1	Q9NSU2	three prime repair exonuclease 1	Last update: February 2019/UniProt release 2019_02	April 13, 2019
DisGeNET	DGKE	P52429	diacylglycerol kinase epsilon	Last update: February 2019/UniProt release 2019_02	April 13, 2019
DisGeNET	OSGEP	Q9NPF4	O-sialoglycoprotein endopeptidase	Last update: February 2019/UniProt release 2019_02	April 13, 2019
DisGeNET	SDHAF2	Q9NX18	succinate dehydrogenase complex assembly factor 2	Last update: February 2019/UniProt release 2019_02	April 13, 2019
DisGeNET	BAZ1B	Q9UIG0	bromodomain adjacent to zinc finger domain 1B	Last update: February 2019/UniProt release 2019_02	April 13, 2019
DisGeNET	GTF2IRD1	Q9UHL9	GTF2I repeat domain containing 1	Last update: February 2019/UniProt release 2019_02	April 13, 2019
DisGeNET	MAFB	Q9Y5Q3	MAF bZIP transcription factor B	Last update: February 2019/UniProt release 2019_02	April 13, 2019
DisGeNET	AMMECR1	Q9Y4X0	Alport syndrome, mental retardation, midface hypoplasia and elliptocytosis chromosomal region gene 1	Last update: February 2019/UniProt release 2019_02	April 13, 2019
DisGeNET	SARS2	Q9NP81	seryl-tRNA synthetase 2, mitochondrial	Last update: February 2019/UniProt release 2019_02	April 13, 2019
DisGeNET	PET100	P0DJ07	PET100 homolog	Last update: February 2019/UniProt release 2019_02	April 13, 2019
DisGeNET	ADAMTS13	Q76LX8	ADAM metallopeptidase with thrombospondin type 1 motif 13	Last update: February 2019/UniProt release 2019_02	April 13, 2019
DisGeNET	ANLN	Q9NQW6	anillin actin binding protein	Last update: February 2019/UniProt release 2019_02	April 13, 2019
DisGeNET	MMACHC	Q9Y4U1	methylmalonic aciduria (cobalamin deficiency) cblC type, with homocystinuria	Last update: February 2019/UniProt release 2019_02	April 13, 2019
DisGeNET	LYZ	P61626	lysozyme	Last update: February 2019/UniProt release 2019_02	April 13, 2019
DisGeNET	APOA1	P02647	apolipoprotein A1	Last update: February 2019/UniProt release 2019_02	April 13, 2019
DisGeNET	ACSL4	O60488	acyl-CoA synthetase long chain family member 4	Last update: February 2019/UniProt release 2019_02	April 13, 2019
DisGeNET	FGA	P02671	fibrinogen alpha chain	Last update: February 2019/UniProt release 2019_02	April 13, 2019
DisGeNET	FH	P07954	fumarate hydratase	Last update: February 2019/UniProt release 2019_02	April 13, 2019
DisGeNET	FN1	P02751	fibronectin 1	Last update: February 2019/UniProt release 2019_02	April 13, 2019
DisGeNET	SLC37A4	O43826	solute carrier family 37 member 4	Last update: February 2019/UniProt release 2019_02	April 13, 2019
DisGeNET	GLA	P06280	galactosidase alpha	Last update: February 2019/UniProt release 2019_02	April 13, 2019
DisGeNET	GTF2I	P78347	general transcription factor IIi	Last update: February 2019/UniProt release 2019_02	April 13, 2019
DisGeNET	HLA-DPB1	P04440	major histocompatibility complex, class II, DP beta 1	Last update: February 2019/UniProt release 2019_02	April 13, 2019
DisGeNET	HMOX1	P09601	heme oxygenase 1	Last update: February 2019/UniProt release 2019_02	April 13, 2019
DisGeNET	HNF4A	P41235	hepatocyte nuclear factor 4 alpha	Last update: February 2019/UniProt release 2019_02	April 13, 2019
DisGeNET	INSR	P06213	insulin receptor	Last update: February 2019/UniProt release 2019_02	April 13, 2019
DisGeNET	ITGA3	P26006	integrin subunit alpha 3	Last update: February 2019/UniProt release 2019_02	April 13, 2019
DisGeNET	LCAT	P04180	lecithin-cholesterol acyltransferase	Last update: February 2019/UniProt release 2019_02	April 13, 2019
DisGeNET	ERCC6	P0DP91	ERCC excision repair 6, chromatin remodeling factor	Last update: February 2019/UniProt release 2019_02	April 13, 2019
DisGeNET	ELN	P15502	elastin	Last update: February 2019/UniProt release 2019_02	April 13, 2019
DisGeNET	ARHGDIA	P52565	Rho GDP dissociation inhibitor alpha	Last update: February 2019/UniProt release 2019_02	April 13, 2019
DisGeNET	ATP7B	P35670	ATPase copper transporting beta	Last update: February 2019/UniProt release 2019_02	April 13, 2019
DisGeNET	B2M	P61769	beta-2-microglobulin	Last update: February 2019/UniProt release 2019_02	April 13, 2019
DisGeNET	SCARB2	Q14108	scavenger receptor class B member 2	Last update: February 2019/UniProt release 2019_02	April 13, 2019
DisGeNET	ERCC8	Q13216	ERCC excision repair 8, CSA ubiquitin ligase complex subunit	Last update: February 2019/UniProt release 2019_02	April 13, 2019
DisGeNET	COL4A4	P53420	collagen type IV alpha 4 chain	Last update: February 2019/UniProt release 2019_02	April 13, 2019
DisGeNET	COL4A5	P29400	collagen type IV alpha 5 chain	Last update: February 2019/UniProt release 2019_02	April 13, 2019
DisGeNET	COX6B1	P14854	cytochrome c oxidase subunit 6B1	Last update: February 2019/UniProt release 2019_02	April 13, 2019
DisGeNET	CTLA4	P16410	cytotoxic T-lymphocyte associated protein 4	Last update: February 2019/UniProt release 2019_02	April 13, 2019
DisGeNET	CTNS	O60931	cystinosin, lysosomal cystine transporter	Last update: February 2019/UniProt release 2019_02	April 13, 2019
DisGeNET	DNASE1L3	Q13609	deoxyribonuclease 1 like 3	Last update: February 2019/UniProt release 2019_02	April 13, 2019
DisGeNET	EHHADH	Q08426	enoyl-CoA hydratase and 3-hydroxyacyl CoA dehydrogenase	Last update: February 2019/UniProt release 2019_02	April 13, 2019
DisGeNET	COL4A3	Q01955	collagen type IV alpha 3 chain	Last update: February 2019/UniProt release 2019_02	April 13, 2019
DisGeNET	LIMK1	P53667	LIM domain kinase 1	Last update: February 2019/UniProt release 2019_02	April 13, 2019
DisGeNET	LRP2	P98164	LDL receptor related protein 2	Last update: February 2019/UniProt release 2019_02	April 13, 2019
DisGeNET	MAX	P61244	MYC associated factor X	Last update: February 2019/UniProt release 2019_02	April 13, 2019
DisGeNET	COX10	Q12887	COX10, heme A:farnesyltransferase cytochrome c oxidase assembly factor	Last update: February 2019/UniProt release 2019_02	April 13, 2019
DisGeNET	PAX2	Q02962	paired box 2	Last update: February 2019/UniProt release 2019_02	April 13, 2019
DisGeNET	PMM2	O15305	phosphomannomutase 2	Last update: February 2019/UniProt release 2019_02	April 13, 2019
DisGeNET	PRODH	O43272	proline dehydrogenase 1	Last update: February 2019/UniProt release 2019_02	April 13, 2019
DisGeNET	PRTN3	P24158	proteinase 3	Last update: February 2019/UniProt release 2019_02	April 13, 2019
DisGeNET	PTPRO	Q16827	protein tyrosine phosphatase, receptor type O	Last update: February 2019/UniProt release 2019_02	April 13, 2019
DisGeNET	RET	P07949	ret proto-oncogene	Last update: February 2019/UniProt release 2019_02	April 13, 2019
DisGeNET	RFC2	P35250	replication factor C subunit 2	Last update: February 2019/UniProt release 2019_02	April 13, 2019
DisGeNET	SAA1	P0DJI8	serum amyloid A1	Last update: February 2019/UniProt release 2019_02	April 13, 2019
DisGeNET	SCO1	O75880	SCO1, cytochrome c oxidase assembly protein	Last update: February 2019/UniProt release 2019_02	April 13, 2019
DisGeNET	SDHA	P31040	succinate dehydrogenase complex flavoprotein subunit A	Last update: February 2019/UniProt release 2019_02	April 13, 2019
DisGeNET	SDHB	P21912	succinate dehydrogenase complex iron sulfur subunit B	Last update: February 2019/UniProt release 2019_02	April 13, 2019
DisGeNET	SDHC	Q99643	succinate dehydrogenase complex subunit C	Last update: February 2019/UniProt release 2019_02	April 13, 2019
DisGeNET	SDHD	O14521	succinate dehydrogenase complex subunit D	Last update: February 2019/UniProt release 2019_02	April 13, 2019
DisGeNET	OCRL	Q01968	OCRL, inositol polyphosphate-5-phosphatase	Last update: February 2019/UniProt release 2019_02	April 13, 2019
DisGeNET	NOTCH2	Q04721	notch 2	Last update: February 2019/UniProt release 2019_02	April 13, 2019
DisGeNET	G6PC	P35575	glucose-6-phosphatase catalytic subunit	Last update: February 2019/UniProt release 2019_02	April 13, 2019
DisGeNET	MYH9	P35579	myosin heavy chain 9	Last update: February 2019/UniProt release 2019_02	April 13, 2019
DisGeNET	MEFV	O15553	MEFV, pyrin innate immunity regulator	Last update: February 2019/UniProt release 2019_02	April 13, 2019
DisGeNET	MDH2	P40926	malate dehydrogenase 2	Last update: February 2019/UniProt release 2019_02	April 13, 2019
DisGeNET	MYO1E	Q12965	myosin IE	Last update: February 2019/UniProt release 2019_02	April 13, 2019
DisGeNET	NEU1	Q99519	neuraminidase 1	Last update: February 2019/UniProt release 2019_02	April 13, 2019
DisGeNET	HPSE	Q9Y251	heparanase	Last update: February 2019/UniProt release 2019_02	April 13, 2019
DisGeNET	TFPI	P10646	tissue factor pathway inhibitor	Last update: February 2019/UniProt release 2019_02	April 13, 2019
DisGeNET	ADM	P35318	adrenomedullin	Last update: February 2019/UniProt release 2019_02	April 13, 2019
DisGeNET	HP	P00738	haptoglobin	Last update: February 2019/UniProt release 2019_02	April 13, 2019
DisGeNET	F3	P13726	coagulation factor III, tissue factor	Last update: February 2019/UniProt release 2019_02	April 13, 2019
DisGeNET	NR3C2	P08235	nuclear receptor subfamily 3 group C member 2	Last update: February 2019/UniProt release 2019_02	April 13, 2019
DisGeNET	ACKR1	Q16570	atypical chemokine receptor 1 (Duffy blood group)	Last update: February 2019/UniProt release 2019_02	April 13, 2019
DisGeNET	ADIPOQ	Q15848	adiponectin, C1Q and collagen domain containing	Last update: February 2019/UniProt release 2019_02	April 13, 2019
DisGeNET	ACE2	Q9BYF1	angiotensin I converting enzyme 2	Last update: February 2019/UniProt release 2019_02	April 13, 2019
DisGeNET	HPSE2	Q8WWQ2	heparanase 2 (inactive)	Last update: February 2019/UniProt release 2019_02	April 13, 2019
DisGeNET	KIF1B, CMT2A, CMT2A1, NBLST1	O60333	Kinesin family member 1B	Last update: February 2019/UniProt release 2019_02	April 13, 2019
DisGeNET	MTOR, FRAP1, SKS	P42345	Mechanistic target of rapamycin	Last update: February 2019/UniProt release 2019_02	April 13, 2019
DisGeNET	TNFRSF1B, TNFR2, TNFBR	P20333	Tumor necrosis factor receptor superfamily, member 1B	Last update: February 2019/UniProt release 2019_02	April 13, 2019
DisGeNET	SDHB, SDH2, SDHIP, PGL4	P21912	Succinate dehydrogenase complex, subunit B, iron sulfur (Ip)	Last update: February 2019/UniProt release 2019_02	April 13, 2019
DisGeNET	ECE1	P42892	Endothelin converting enzyme 1	Last update: February 2019/UniProt release 2019_02	April 13, 2019
DisGeNET	C1QA	P02745	Complement component 1, q subcomponent, A chain	Last update: February 2019/UniProt release 2019_02	April 13, 2019
DisGeNET	C1QC, C1QG	P02747	Complement component 1, q subcomponent, C chain	Last update: February 2019/UniProt release 2019_02	April 13, 2019
DisGeNET	C1QB	P02746	Complement component 1, q subcomponent, B chain	Last update: February 2019/UniProt release 2019_02	April 13, 2019
DisGeNET	SMPDL3B, ASML3B	Q92485	Sphingolyelin phosphodiesterase, acid-like, 3B	Last update: February 2019/UniProt release 2019_02	April 13, 2019
DisGeNET	PTCH2	Q9Y6C5	Patched, Drosophila, homolog of, 2	Last update: February 2019/UniProt release 2019_02	April 13, 2019
DisGeNET	MMACHC	Q9Y4U1	MMACHC gene	Last update: February 2019/UniProt release 2019_02	April 13, 2019
DisGeNET	PRDX1, PRXI, PAGA, NKEFA	Q06830	Peroxiredoxin 1	Last update: February 2019/UniProt release 2019_02	April 13, 2019
DisGeNET	COA7, RESA1, SELRC1, C1orf163	Q96BR5	Cytochrome C oxidase assembly factor	Last update: February 2019/UniProt release 2019_02	April 13, 2019
DisGeNET	LEPR, OBR, LEPRD	P48357	Leptin receptor	Last update: February 2019/UniProt release 2019_02	April 13, 2019
DisGeNET	IL12RB2	Q99665	Interleukin 12 receptor, beta-2	Last update: February 2019/UniProt release 2019_02	April 13, 2019
DisGeNET	ADD1	P35611	Adducin-1, alpha	Last update: February 2019/UniProt release 2019_02	April 13, 2019
DisGeNET	AGT, SERPINA8	P01019	Angiotensinogen	Last update: February 2019/UniProt release 2019_02	April 13, 2019
DisGeNET	AGTR1, AGTR1A, AT2R1	P30556	Angiotensin receptor 1	Last update: February 2019/UniProt release 2019_02	April 13, 2019
DisGeNET	ACE, DCP1, ACE1, MVCD3, ICH	P12821	Angiotensin I converting enzyme (dipeptidyl carboxypeptidase-1)	Last update: February 2019/UniProt release 2019_02	April 13, 2019
DisGeNET	APOA1	P02647	Apolipoprotein A-I	Last update: February 2019/UniProt release 2019_02	April 13, 2019
DisGeNET	APOE, AD2, LPG, LDLCQ5	P02649	Apolipoprotein E	Last update: February 2019/UniProt release 2019_02	April 13, 2019
DisGeNET	B2M, IMD43	P61769	Beta-2-microglobulin	Last update: February 2019/UniProt release 2019_02	April 13, 2019
DisGeNET	CD80, CD28LG, LAB7	P33681	CD80 antigen (CD28 antigen ligand 1, B7-1 antigen)	Last update: February 2019/UniProt release 2019_02	April 13, 2019
DisGeNET	CTSL	P07711	Cathepsin L	Last update: February 2019/UniProt release 2019_02	April 13, 2019
DisGeNET	COL4A3, ATS2, ATS3	Q01955	Collagen IV, alpha-3 polypeptide (Goodpasture antigen)	Last update: February 2019/UniProt release 2019_02	April 13, 2019
DisGeNET	COL4A4, ATS2, BFH	P53420	Collagen IV, alpha-4 polypeptide	Last update: February 2019/UniProt release 2019_02	April 13, 2019
DisGeNET	C3, ARMD9, AHUS5	P01024	Complement component-3	Last update: February 2019/UniProt release 2019_02	April 13, 2019
DisGeNET	MCP, CD46, AHUS2	P15529	Membrane cofactor protein (CD46, trophoblast-lymphocyte cross-reactive antigen)	Last update: February 2019/UniProt release 2019_02	April 13, 2019
DisGeNET	COX8A	P10176	Cytochrome c oxidase, subunit VIIIA	Last update: February 2019/UniProt release 2019_02	April 13, 2019
DisGeNET	CTLA4, IDDM12, CELIAC3, ALPS5	P16410	Cytotoxic T-lymphocyte-associated serine esterase-4	Last update: February 2019/UniProt release 2019_02	April 13, 2019
DisGeNET	COX6B1	P14854	Cytochrome c oxidase, subunit VIb polypeptide 1 (ubiquitous)	Last update: February 2019/UniProt release 2019_02	April 13, 2019
DisGeNET	DNASE1, DNL1	P24855	Deoxyribonuclease I	Last update: February 2019/UniProt release 2019_02	April 13, 2019
DisGeNET	GATA3, HDR, HDRS	P23771	GATA-binding protein-3	Last update: February 2019/UniProt release 2019_02	April 13, 2019
DisGeNET	ESR1, ESR, ESTRR	P03372	Estrogen receptor 1	Last update: February 2019/UniProt release 2019_02	April 13, 2019
DisGeNET	ERCC4, XPF, FANCQ, XFEPS	Q92889	Excision-repair, complementing defective, in Chinese hamster, number 4	Last update: February 2019/UniProt release 2019_02	April 13, 2019
DisGeNET	CFH, HF1, HUS, ARMD4, AHUS1	P08603	Complement factor H	Last update: February 2019/UniProt release 2019_02	April 13, 2019
DisGeNET	FGA	P02671	Fibrinogen, alpha polypeptide	Last update: February 2019/UniProt release 2019_02	April 13, 2019
DisGeNET	FN1, FN, LETS, FNZ, GFND2, SMDCF	P02751	Fibronectin-1	Last update: February 2019/UniProt release 2019_02	April 13, 2019
DisGeNET	GSN	P06396	Gelsolin	Last update: February 2019/UniProt release 2019_02	April 13, 2019
DisGeNET	GFND1	P39210	Glomerulopathy with fibronectin deposits 1	Last update: February 2019/UniProt release 2019_02	April 13, 2019
DisGeNET	MPV17, MTDPS6	P11168	Mpv17 transgene, mouse, glomerulosclerosis, homolog of	Last update: February 2019/UniProt release 2019_02	April 13, 2019
DisGeNET	CFB, BF, GBG, AHUS4, ARMD14, CFBD	P00751	Complement factor B	Last update: February 2019/UniProt release 2019_02	April 13, 2019
DisGeNET	GNB3, CSNB1H	P16520	Guanine nucleotide-binding protein, beta polypeptide-3	Last update: February 2019/UniProt release 2019_02	April 13, 2019
DisGeNET	FCGR2A, IGFR2, CD32	P12318	Fc fragment of IgG, low affinity IIa, receptor for (CD32)	Last update: February 2019/UniProt release 2019_02	April 13, 2019
DisGeNET	LAMB2, LAMS, NPHS5	P55268	Laminin, beta-2 (laminin S)	Last update: February 2019/UniProt release 2019_02	April 13, 2019
DisGeNET	LYZ	P61626	Lysozyme	Last update: February 2019/UniProt release 2019_02	April 13, 2019
DisGeNET	MAX	P61244	MAX protein	Last update: February 2019/UniProt release 2019_02	April 13, 2019
DisGeNET	MUC1, PUM, MCKD1	P15941	Mucin 1, transmembrane	Last update: February 2019/UniProt release 2019_02	April 13, 2019
DisGeNET	CXCR4, D2S201E, NPY3R, WHIMS	P61073	Chemokine (C-X-C motif) receptor 4 (neuropeptide Y receptor Y3)	Last update: February 2019/UniProt release 2019_02	April 13, 2019
DisGeNET	NOS3	P29474	Nitric oxide synthase 3, endothelial cell	Last update: February 2019/UniProt release 2019_02	April 13, 2019
DisGeNET	NOS2A, NOS2	P35228	Nitric oxide synthase 2A, inducible, hepatocytes	Last update: February 2019/UniProt release 2019_02	April 13, 2019
DisGeNET	RET, MEN2A, HSCR1	P07949	RET transforming sequence; oncogene RET	Last update: February 2019/UniProt release 2019_02	April 13, 2019
DisGeNET	FLT1	P17948	fms-related tyrosine kinase-1 (vascular endothelial growth factor/vascular permeability factor receptor)	Last update: February 2019/UniProt release 2019_02	April 13, 2019
DisGeNET	PAX2, PAPRS, FSGS7	Q02962	Paired box homeotic gene-2	Last update: February 2019/UniProt release 2019_02	April 13, 2019
DisGeNET	NUP85, PCNT1, PCNT, NPHS17	Q9BW27	Nucleoporin 85kD	Last update: February 2019/UniProt release 2019_02	April 13, 2019
DisGeNET	PLAUR, URKR	Q03405	Plasminogen activator, urokinase, receptor	Last update: February 2019/UniProt release 2019_02	April 13, 2019
DisGeNET	SELP, GRMP	P16109	Selectin P (granulocyte membrane protein, 140kD; antigen CD62)	Last update: February 2019/UniProt release 2019_02	April 13, 2019
DisGeNET	PKD2	Q13563	Polycystin-2	Last update: February 2019/UniProt release 2019_02	April 13, 2019
DisGeNET	AMBP, ITIL, ITI, HCP	P02760	Alpha-1-microglobulin/bikunin precursor (inter-alpha-trypsin inhibitor, light chain; protein HC)	Last update: February 2019/UniProt release 2019_02	April 13, 2019
DisGeNET	ZAP70, SRK, ADMIO2, IMD48	P43403	Zeta-chain associated protein kinase, 70kD (syk-related tyrosine kinase)	Last update: February 2019/UniProt release 2019_02	April 13, 2019
DisGeNET	MAF, CCA4, CTRCT21, AYGRP	O75444	v-Maf avian musculoaponeurotic fibrosarcoma oncogene homolog	Last update: February 2019/UniProt release 2019_02	April 13, 2019
DisGeNET	ATP1B1	P05026	ATPase, Na+K+ transporting, beta-1 polypeptide	Last update: February 2019/UniProt release 2019_02	April 13, 2019
DisGeNET	CD81, TAPA1, CVID6	P60033	CD81 antigen (target of antiproliferative antibody-1)	Last update: February 2019/UniProt release 2019_02	April 13, 2019
DisGeNET	HNF1B, TCF2, HNF2, MODY5, FJHN, HPC11	P35680	HNF1 homeobox B (transcription factor 2)	Last update: February 2019/UniProt release 2019_02	April 13, 2019
DisGeNET	TGFB1, DPD1, CED, IBDIMDE	P01137	Transforming growth factor, beta-1	Last update: February 2019/UniProt release 2019_02	April 13, 2019
DisGeNET	TNF, TNFA	P01375	Tumor necrosis factor (cachectin)	Last update: February 2019/UniProt release 2019_02	April 13, 2019
DisGeNET	TNFRSF1A, TNFR1, TNFAR, FPF, MS5	P19438	Tumor necrosis factor receptor superfamily, member 1A	Last update: February 2019/UniProt release 2019_02	April 13, 2019
DisGeNET	UMOD, HNFJ1, FJHN, MCKD2, ADMCKD2	P07911	Uromodulin (uromucoid, Tamm-Horsfall glycoprotein)	Last update: February 2019/UniProt release 2019_02	April 13, 2019
DisGeNET	VEGF, MVCD1	P15692	Vascular endothelial growth factor	Last update: February 2019/UniProt release 2019_02	April 13, 2019
DisGeNET	CFI, FI, AHUS3, ARMD13	P05156	Complement factor I	Last update: February 2019/UniProt release 2019_02	April 13, 2019
DisGeNET	C6	P13671	Complement component-6	Last update: February 2019/UniProt release 2019_02	April 13, 2019
DisGeNET	LRP2, DBS	P98164	Low density lipoprotein-related protein 2	Last update: February 2019/UniProt release 2019_02	April 13, 2019
DisGeNET	SCNN1A, BESC2, LIDLS3	P37088	Sodium channel, nonvoltage-gated 1, alpha	Last update: February 2019/UniProt release 2019_02	April 13, 2019
DisGeNET	NOTCH2, AGS2, HJCYS	Q04721	Notch, Drosophila, homolog of, 2	Last update: February 2019/UniProt release 2019_02	April 13, 2019
DisGeNET	PTPRO, GLEPP1, NPHS6	Q16827	Protein tyrosine phosphatase, receptor type, O	Last update: February 2019/UniProt release 2019_02	April 13, 2019
DisGeNET	PTPN22, PEP, PTPN8, LYP	Q9Y2R2	Protein tyrosine phosphatase, nonreceptor-type 22	Last update: February 2019/UniProt release 2019_02	April 13, 2019
DisGeNET	GDNF, HSCR3	P39905	Glial cell line derived neurotrophic factor	Last update: February 2019/UniProt release 2019_02	April 13, 2019
DisGeNET	SLC12A1, NKCC2	Q13621	Solute carrier family 12 (sodium/potassium/chloride transporters), member 1	Last update: February 2019/UniProt release 2019_02	April 13, 2019
DisGeNET	FAT1, FAT	Q14517	FAT tumor suppressor, Drosophila, homolog of, 1	Last update: February 2019/UniProt release 2019_02	April 13, 2019
DisGeNET	NR3C2, MLR, MCR	P08235	Nuclear receptor subfamily 3, group C, member 2 (mineralocorticoid receptor; aldosterone receptor)	Last update: February 2019/UniProt release 2019_02	April 13, 2019
DisGeNET	PGF, PLGF	P49763	Placental growth factor, vascular endothelial growth factor-related protein	Last update: February 2019/UniProt release 2019_02	April 13, 2019
DisGeNET	PTCH1, NBCCS, BCNS, HPE7	Q13635	Patched, Drosophila, homolog of	Last update: February 2019/UniProt release 2019_02	April 13, 2019
DisGeNET	PKD1	P98161	Polycystin-1	Last update: February 2019/UniProt release 2019_02	April 13, 2019
DisGeNET	CCL13, SCYA13, NCC1	Q99616	Chemokine, C-C motif, ligand 13	Last update: February 2019/UniProt release 2019_02	April 13, 2019
DisGeNET	DGKE, NPHS7, AHUS7	P52429	Diacylglycerol kinase, epsilon, 64-kD	Last update: February 2019/UniProt release 2019_02	April 13, 2019
DisGeNET	MYO1E, MYO1C, FSGS6	Q12965	Myosin IE	Last update: February 2019/UniProt release 2019_02	April 13, 2019
DisGeNET	PMM2, CDG1A	O15305	Phosphomannomutase 2	Last update: February 2019/UniProt release 2019_02	April 13, 2019
DisGeNET	ARHGDIA, GDIA1, NPHS8	P52565	Rho GDP dissociation inhibitor (GDI) alpha	Last update: February 2019/UniProt release 2019_02	April 13, 2019
DisGeNET	COX10	Q12887	Cytochrome c oxidase, subunit X	Last update: February 2019/UniProt release 2019_02	April 13, 2019
DisGeNET	KCNJ10, SESAME	P78508	Potassium inwardly-rectifying channel, subfamily J, member 10	Last update: February 2019/UniProt release 2019_02	April 13, 2019
DisGeNET	CD151, PETA3, SFA1, MER2	P48509	CD151 antigen	Last update: February 2019/UniProt release 2019_02	April 13, 2019
DisGeNET	SCARB2, CD36L2, LIMPII, AMRF, EPM4	Q14108	Scavenger receptor class B, member 2	Last update: February 2019/UniProt release 2019_02	April 13, 2019
DisGeNET	DNM2, CMTDIB, CMTDI1, CMT2M, LCCS5	P50570	Dynamin-2	Last update: February 2019/UniProt release 2019_02	April 13, 2019
DisGeNET	FOXC2, FKHL14, MFH1	Q99958	Forkhead box C2	Last update: February 2019/UniProt release 2019_02	April 13, 2019
DisGeNET	SPRY2, IGAN3	O43597	Sprouty, Drosophila, homolog of, 2	Last update: February 2019/UniProt release 2019_02	April 13, 2019
DisGeNET	LMX1B, NPS1	O60663	LIM homeo box transcription factor 1, beta	Last update: February 2019/UniProt release 2019_02	April 13, 2019
DisGeNET	MGAT2, CDGS2, CDG2A	Q10469	Mannosyl (alpha-1,6-)-glycoprotein beta-1,2-N-acetylglucosaminyl- transferase	Last update: February 2019/UniProt release 2019_02	April 13, 2019
DisGeNET	SLC37A4, G6PT1	O43826	Solute carrier family 37 (glucose-6-phosphate transporter), member 4	Last update: February 2019/UniProt release 2019_02	April 13, 2019
DisGeNET	SDHD, PGL1	O14521	Succinate dehydrogenase complex, subunit D, integral membrane protein	Last update: February 2019/UniProt release 2019_02	April 13, 2019
DisGeNET	NPHS1, NPHN	O60500	Nephrin	Last update: February 2019/UniProt release 2019_02	April 13, 2019
DisGeNET	CUBN, IFCR, MGA1	O60494	Cubilin (intrinsic factor-cobalamin receptor)	Last update: February 2019/UniProt release 2019_02	April 13, 2019
DisGeNET	RGS5	O15539	Regulator of G protein signaling-5	Last update: February 2019/UniProt release 2019_02	April 13, 2019
DisGeNET	DPH1, DPH2L1, OVCA1, DEDSSH	Q9BZG8	Diphthamide biosynthesis protein 1	Last update: February 2019/UniProt release 2019_02	April 13, 2019
DisGeNET	SCO1, SCOD1	O75880	SCO1 cytochrome c oxidase assembly protein	Last update: February 2019/UniProt release 2019_02	April 13, 2019
DisGeNET	TRPC6, TRP6, FSGS2	Q9Y210	Transient receptor potential channel-6	Last update: February 2019/UniProt release 2019_02	April 13, 2019
DisGeNET	SGPL1, SPL, NPHS14	O95470	Sphingosine-1-phosphate lyase 1	Last update: February 2019/UniProt release 2019_02	April 13, 2019
DisGeNET	GNE, GLCNE, IBM2, DMRV, NM	Q9Y223	UDP-N-acetylglucosamine 2-epimerase/N-acetylmannosamine kinase	Last update: February 2019/UniProt release 2019_02	April 13, 2019
DisGeNET	TNFSF13B, BLYS, BAFF	Q9Y275	Tumor necrosis factor ligand superfamily, member 13B	Last update: February 2019/UniProt release 2019_02	April 13, 2019
DisGeNET	ADAMTS13, VWFCP, TTP	Q76LX8	A disintegrin-like and metalloprotease with thrombospondin type 1 motif, 13	Last update: February 2019/UniProt release 2019_02	April 13, 2019
DisGeNET	CD2AP, CMS	Q9Y5K6	CD2-associated protein	Last update: February 2019/UniProt release 2019_02	April 13, 2019
DisGeNET	FCGR2B, CD32	P31994	Fc fragment of IgG, low affinity IIb, receptor for	Last update: February 2019/UniProt release 2019_02	April 13, 2019
DisGeNET	ACTN4, FSGS1, FSGS	O43707	Actinin, alpha-4	Last update: February 2019/UniProt release 2019_02	April 13, 2019
DisGeNET	PDCN, NPHS2, SRN1	Q9NP85	Podocin	Last update: February 2019/UniProt release 2019_02	April 13, 2019
DisGeNET	TNFRSF13B, TACI, CVID2	O14836	Tumor necrosis factor receptor superfamily, member 13B	Last update: February 2019/UniProt release 2019_02	April 13, 2019
DisGeNET	PLA2R1, PLA2R	Q13018	Phospholipase A2 receptor 1	Last update: February 2019/UniProt release 2019_02	April 13, 2019
DisGeNET	ITGA3, CD49C, GAPB3, ILNEB	P26006	Integrin, alpha-3	Last update: February 2019/UniProt release 2019_02	April 13, 2019
DisGeNET	RGS19IP1, C19orf3, GIPC	O14908	Regulator of G-protein signaling 19 interacting protein 1	Last update: February 2019/UniProt release 2019_02	April 13, 2019
DisGeNET	CORIN, CRN, TMPRSS10, ATC2, PEE5	Q9Y5Q5	Corin, serine peptidase	Last update: February 2019/UniProt release 2019_02	April 13, 2019
DisGeNET	CYP3A5, P450PCN3	P20815	Cytochrome P450, subfamily IIIA, polypeptide 5	Last update: February 2019/UniProt release 2019_02	April 13, 2019
DisGeNET	SLC35A1, CST, CDG2F	P78382	Solute carrier family 35 (CMP-sialic acid transporter), member 1	Last update: February 2019/UniProt release 2019_02	April 13, 2019
DisGeNET	AMN	Q9BXJ7	Amnionless, mouse, homolog of	Last update: February 2019/UniProt release 2019_02	April 13, 2019
DisGeNET	CTNS	O60931	Cystinosin	Last update: February 2019/UniProt release 2019_02	April 13, 2019
DisGeNET	PSTPIP1, PSTPIP, CD2BP1, PAPAS	O43586	Proline-serine-threonine phosphatase-interacting protein 1	Last update: February 2019/UniProt release 2019_02	April 13, 2019
DisGeNET	MAGI2, AIP1, KIAA0705, NPHS15	Q86UL8	Membrane-associated guanylate kinase, WW and PDZ domains-containing, 2	Last update: February 2019/UniProt release 2019_02	April 13, 2019
DisGeNET	TREX1, AGS1, CRV, HERNS	Q9NSU2	3' repair exonuclease 1	Last update: February 2019/UniProt release 2019_02	April 13, 2019
KEGG	LCAT	P04180	lecithin-cholesterol acyltransferase	Release notes, April 1, 2019	April 13, 2019
KEGG	MYH9	P35579	myosin heavy chain 9	Release notes, April 1, 2019	April 13, 2019
KEGG	ACTN4	O43707	actinin alpha 4	Release notes, April 1, 2019	April 13, 2019
KEGG	TRPC 6	Q9Y210	transient receptor potential cation channel subfamily C member 6	Release notes, April 1, 2019	April 13, 2019
KEGG	CD2AP	Q9Y5K6	CD2 associated protein	Release notes, April 1, 2019	April 13, 2019
KEGG	APOL1	O14791	apolipoprotein L1	Release notes, April 1, 2019	April 13, 2019
KEGG	INF2	Q27J81	inverted formin	Release notes, April 1, 2019	April 13, 2019
KEGG	MYO1E	Q12965	myosin IE	Release notes, April 1, 2019	April 13, 2019
KEGG	PAX2	Q02962	paired box 2	Release notes, April 1, 2019	April 13, 2019
KEGG	ANLN	Q9NQW6	anillin actin binding protein	Release notes, April 1, 2019	April 13, 2019
KEGG	CRB2	Q5IJ48	crumbs cell polarity complex component 2	Release notes, April 1, 2019	April 13, 2019
KEGG	CLCN	P51795	chloride voltage-gated channel 5	Release notes, April 1, 2019	April 13, 2019
KEGG	OCRL1	Q01968	OCRL inositol polyphosphate-5-phosphatase	Release notes, April 1, 2019	April 13, 2019
KEGG	LRP2	P98164	low density lipoprotein-related protein 2	Release notes, April 1, 2019	April 13, 2019
KEGG	APOE	P02649	apolipoprotein E	Release notes, April 1, 2019	April 13, 2019
KEGG	FN1	P02751	fibronectin 1	Release notes, April 1, 2019	April 13, 2019
KEGG	NPHS1	O60500	NPHS1 adhesion molecule	Release notes, April 1, 2019	April 13, 2019
KEGG	NPHS2	Q9NP85	NPHS2 stomatin family member	Release notes, April 1, 2019	April 13, 2019
KEGG	PLCE1	Q9P212	phospholipase C epsilon 1	Release notes, April 1, 2019	April 13, 2019
KEGG	WT1	P19544	WT1 transcription factor	Release notes, April 1, 2019	April 13, 2019
KEGG	LAMB2	P55268	laminin subunit beta 2	Release notes, April 1, 2019	April 13, 2019
KEGG	PTPRO	Q16827	protein tyrosine phosphatase receptor type O	Release notes, April 1, 2019	April 13, 2019
KEGG	DGKE	P52429	diacylglycerol kinase epsilon	Release notes, April 1, 2019	April 13, 2019
KEGG	ARHGDIA	P52565	Rho GDP dissociation inhibitor alpha	Release notes, April 1, 2019	April 13, 2019
KEGG	COQ8B	Q96D53	coenzyme Q8B	Release notes, April 1, 2019	April 13, 2019
KEGG	EMP2	P54851	epithelial membrane protein 2	Release notes, April 1, 2019	April 13, 2019
KEGG	NUP107	P57740	nucleoporin 107	Release notes, April 1, 2019	April 13, 2019
KEGG	NUP93	Q8N1F7	nucleoporin 93	Release notes, April 1, 2019	April 13, 2019
KEGG	NUP205	Q92621	nucleoporin 205	Release notes, April 1, 2019	April 13, 2019
KEGG	SGPL1	O95470	sphingosine-1-phosphate lyase 1	Release notes, April 1, 2019	April 13, 2019
KEGG	MAGI2	Q86UL8	membrane associated guanylate kinase	Release notes, April 1, 2019	April 13, 2019
KEGG	KANK2	Q63ZY3	KN motif and ankyrin repeat domains 2	Release notes, April 1, 2019	April 13, 2019
KEGG	CLCN5	P51795	chloride voltage-gated channel 5	Release notes, April 1, 2019	April 13, 2019
OMIM	KIF1B, CMT2A, CMT2A1, NBLST1	O60333	Kinesin family member 1B	Updated April 12, 2019	April 14, 2019
OMIM	MTOR, FRAP1, SKS	P42345	Mechanistic target of rapamycin	Updated April 12, 2019	April 14, 2019
OMIM	TNFRSF1B, TNFR2, TNFBR	P20333	Tumor necrosis factor receptor superfamily, member 1B	Updated April 12, 2019	April 14, 2019
OMIM	SDHB, SDH2, SDHIP, PGL4	P21912	Succinate dehydrogenase complex, subunit B, iron sulfur (Ip)	Updated April 12, 2019	April 14, 2019
OMIM	ECE1	P42892	Endothelin converting enzyme 1	Updated April 12, 2019	April 14, 2019
OMIM	C1QA	P02745	Complement component 1, q subcomponent, A chain	Updated April 12, 2019	April 14, 2019
OMIM	C1QC, C1QG	P02747	Complement component 1, q subcomponent, C chain	Updated April 12, 2019	April 14, 2019
OMIM	C1QB	P02746	Complement component 1, q subcomponent, B chain	Updated April 12, 2019	April 14, 2019
OMIM	SMPDL3B, ASML3B	Q92485	Sphingolyelin phosphodiesterase, acid-like, 3B	Updated April 12, 2019	April 14, 2019
OMIM	PTCH2	Q9Y6C5	Patched, Drosophila, homolog of, 2	Updated April 12, 2019	April 14, 2019
OMIM	MMACHC	Q9Y4U1	MMACHC gene	Updated April 12, 2019	April 14, 2019
OMIM	PRDX1, PRXI, PAGA, NKEFA	Q06830	Peroxiredoxin 1	Updated April 12, 2019	April 14, 2019
OMIM	COA7, RESA1, SELRC1, C1orf163	Q96BR5	Cytochrome C oxidase assembly factor	Updated April 12, 2019	April 14, 2019
OMIM	LEPR, OBR, LEPRD	P48357	Leptin receptor	Updated April 12, 2019	April 14, 2019
OMIM	IL12RB2	Q99665	Interleukin 12 receptor, beta-2	Updated April 12, 2019	April 14, 2019
OMIM	PTPN22, PEP, PTPN8, LYP	Q9Y2R2	Protein tyrosine phosphatase, nonreceptor-type 22	Updated April 12, 2019	April 14, 2019
OMIM	NOTCH2, AGS2, HJCYS	Q04721	Notch, Drosophila, homolog of, 2	Updated April 12, 2019	April 14, 2019
OMIM	MUC1, PUM, MCKD1	P15941	Mucin 1, transmembrane	Updated April 12, 2019	April 14, 2019
OMIM	KIRREL, NEPH1	Q96J84	Kin of IRRE-like	Updated April 12, 2019	April 14, 2019
OMIM	KCNJ10, SESAME	P78508	Potassium inwardly-rectifying channel, subfamily J, member 10	Updated April 12, 2019	April 14, 2019
OMIM	FCGR2A, IGFR2, CD32	P12318	Fc fragment of IgG, low affinity IIa, receptor for (CD32)	Updated April 12, 2019	April 14, 2019
OMIM	FCGR2B, CD32	P31994	Fc fragment of IgG, low affinity IIb, receptor for	Updated April 12, 2019	April 14, 2019
OMIM	RGS5	O15539	Regulator of G protein signaling-5	Updated April 12, 2019	April 14, 2019
OMIM	ATP1B1	P05026	ATPase, Na+K+ transporting, beta-1 polypeptide	Updated April 12, 2019	April 14, 2019
OMIM	SELP, GRMP	P16109	Selectin P (granulocyte membrane protein, 140kD; antigen CD62)	Updated April 12, 2019	April 14, 2019
OMIM	PDCN, NPHS2, SRN1	Q9NP85	Podocin	Updated April 12, 2019	April 14, 2019
OMIM	CFH, HF1, HUS, ARMD4, AHUS1	P08603	Complement factor H	Updated April 12, 2019	April 14, 2019
OMIM	CFHR5, CFHL5, FHR5, CFHR5D	Q9BXR6	Complement factor H-related 5	Updated April 12, 2019	April 14, 2019
OMIM	DSTYK, KIAA0472, RIP5, DUSTYPK, CAKUT1, SPG23	Q6XUX3	Dual serine/threonine and tyrosine protein kinase	Updated April 12, 2019	April 14, 2019
OMIM	MCP, CD46, AHUS2	P15529	Membrane cofactor protein (CD46, trophoblast-lymphocyte cross-reactive antigen)	Updated April 12, 2019	April 14, 2019
OMIM	NUP133, NPHS18, GAMOS8	Q8WUM0	Nucleoporin, 133kD	Updated April 12, 2019	April 14, 2019
OMIM	AGT, SERPINA8	P01019	Angiotensinogen	Updated April 12, 2019	April 14, 2019
OMIM	COX20, FAM36A	Q5RI15	Cytochrome c oxidase 20, S. cerevisiae, homolog of	Updated April 12, 2019	April 14, 2019
OMIM	WDR35, NAOFEN, KIAA1336, CED2, SRTD7	Q9P2L0	WD repeat-containing protein 35	Updated April 12, 2019	April 14, 2019
OMIM	MPV17, MTDPS6	P39210	Mpv17 transgene, mouse, glomerulosclerosis, homolog of	Updated April 12, 2019	April 14, 2019
OMIM	LGALSL	Q3ZCW2	Galectin-like protein	Updated April 12, 2019	April 14, 2019
OMIM	TPRKB, GAMOS5	Q9Y3C4	TP53RK-binding protein	Updated April 12, 2019	April 14, 2019
OMIM	TMEM127	O75204	Transmembrane protein 127	Updated April 12, 2019	April 14, 2019
OMIM	ZAP70, SRK, ADMIO2, IMD48	P43403	Zeta-chain associated protein kinase, 70kD (syk-related tyrosine kinase)	Updated April 12, 2019	April 14, 2019
OMIM	NPHP1, NPH1, SLSN1, JBTS4	O15259	Nephrocystin	Updated April 12, 2019	April 14, 2019
OMIM	CXCR4, D2S201E, NPY3R, WHIMS	P61073	Chemokine (C-X-C motif) receptor 4 (neuropeptide Y receptor Y3)	Updated April 12, 2019	April 14, 2019
OMIM	PLA2R1, PLA2R	Q13018	Phospholipase A2 receptor 1	Updated April 12, 2019	April 14, 2019
OMIM	LRP2, DBS	P98164	Low density lipoprotein-related protein 2	Updated April 12, 2019	April 14, 2019
OMIM	CTLA4, IDDM12, CELIAC3, ALPS5	P16410	Cytotoxic T-lymphocyte-associated serine esterase-4	Updated April 12, 2019	April 14, 2019
OMIM	FASTKD2, KIAA0971	Q9NYY8	FAST kinase domains 2	Updated April 12, 2019	April 14, 2019
OMIM	FN1, FN, LETS, FNZ, GFND2, SMDCF	P02751	Fibronectin-1	Updated April 12, 2019	April 14, 2019
OMIM	SMARCAL1, HARP, SIOD	Q9NZC9	SWI/SNF related, matrix associated, actin dependent regulator of chromatin, subfamily A-like	Updated April 12, 2019	April 14, 2019
OMIM	FARSLB, FRSB, RILDBC	Q9NSD9	Phenylalanine-tRNA synthetase-like, beta subunit	Updated April 12, 2019	April 14, 2019
OMIM	COL4A4, ATS2, BFH	P53420	Collagen IV, alpha-4 polypeptide	Updated April 12, 2019	April 14, 2019
OMIM	COL4A3, ATS2, ATS3	Q01955	Collagen IV, alpha-3 polypeptide (Goodpasture antigen)	Updated April 12, 2019	April 14, 2019
OMIM	VHL	P40337	VHL gene	Updated April 12, 2019	April 14, 2019
OMIM	TREX1, AGS1, CRV, HERNS	Q9NSU2	3' repair exonuclease 1	Updated April 12, 2019	April 14, 2019
OMIM	LAMB2, LAMS, NPHS5	P55268	Laminin, beta-2 (laminin S)	Updated April 12, 2019	April 14, 2019
OMIM	CD80, CD28LG, LAB7	P33681	CD80 antigen (CD28 antigen ligand 1, B7-1 antigen)	Updated April 12, 2019	April 14, 2019
OMIM	SEC61A1, SEC61, HNFJ4	P61619	Sec61 translocon, alpha-1 subunit	Updated April 12, 2019	April 14, 2019
OMIM	NPHP3, NPH3, RHPD1, MKS7	Q7Z494	Nephrocystin 3	Updated April 12, 2019	April 14, 2019
OMIM	AGTR1, AGTR1A, AT2R1	P30556	Angiotensin receptor 1	Updated April 12, 2019	April 14, 2019
OMIM	SLC2A2, GLUT2	P11168	Solute carrier family 2 (facilitated glucose transporter), member 2	Updated April 12, 2019	April 14, 2019
OMIM	EHHADH, PBFE, LBFP, FRTS3	Q08426	Enoyl-Coenzyme A, hydratase/3-hydroxyacyl Coenzyme A dehydrogenase	Updated April 12, 2019	April 14, 2019
OMIM	ADD1	P35611	Adducin-1, alpha	Updated April 12, 2019	April 14, 2019
OMIM	WDR19, SRTD5, ATD5, NPHP13, CED4	Q8NEZ3	WD repeat-containing protein 19	Updated April 12, 2019	April 14, 2019
OMIM	CORIN, CRN, TMPRSS10, ATC2, PEE5	Q9Y5Q5	Corin, serine peptidase	Updated April 12, 2019	April 14, 2019
OMIM	SCARB2, CD36L2, LIMPII, AMRF, EPM4	Q14108	Scavenger receptor class B, member 2	Updated April 12, 2019	April 14, 2019
OMIM	COQ2, COQ10D1, MSA1	Q96H96	CoQ2, S. cerevisiae, homolog of (parahydroxybenzoate-polyprenyltransferase, mitochondrial)	Updated April 12, 2019	April 14, 2019
OMIM	PKD2	Q13563	Polycystin-2	Updated April 12, 2019	April 14, 2019
OMIM	CFI, FI, AHUS3, ARMD13	P05156	Complement factor I	Updated April 12, 2019	April 14, 2019
OMIM	NR3C2, MLR, MCR	P08235	Nuclear receptor subfamily 3, group C, member 2 (mineralocorticoid receptor; aldosterone receptor)	Updated April 12, 2019	April 14, 2019
OMIM	FGA	P02671	Fibrinogen, alpha polypeptide	Updated April 12, 2019	April 14, 2019
OMIM	ELA, LOC100506013	P0DMC3	Elabela	Updated April 12, 2019	April 14, 2019
OMIM	FAT1, FAT	Q14517	FAT tumor suppressor, Drosophila, homolog of, 1	Updated April 12, 2019	April 14, 2019
OMIM	NIPBL, CDLS1	Q6KC79	Nipped-B-like (delangin)	Updated April 12, 2019	April 14, 2019
OMIM	GDNF, HSCR3	P39905	Glial cell line derived neurotrophic factor	Updated April 12, 2019	April 14, 2019
OMIM	C6	P13671	Complement component-6	Updated April 12, 2019	April 14, 2019
OMIM	ERCC8, CKN1, CSA, UVSS2	Q13216	Excision repair cross-complementing rodent repair deficiency, complementation group 8	Updated April 12, 2019	April 14, 2019
OMIM	HFE, HLA-H, HFE1, MVCD7, TFQTL2	Q30201	Hemochromatosis gene	Updated April 12, 2019	April 14, 2019
OMIM	TNF, TNFA	P01375	Tumor necrosis factor (cachectin)	Updated April 12, 2019	April 14, 2019
OMIM	NEU1, NEU, SIAL1	Q99519	Neuraminidase 1 (lysosomal sialidase; sialidase 1)	Updated April 12, 2019	April 14, 2019
OMIM	CFB, BF, GBG, AHUS4, ARMD14, CFBD	P00751	Complement factor B	Updated April 12, 2019	April 14, 2019
OMIM	VEGF, MVCD1	P15692	Vascular endothelial growth factor	Updated April 12, 2019	April 14, 2019
OMIM	CD2AP, CMS	Q9Y5K6	CD2-associated protein	Updated April 12, 2019	April 14, 2019
OMIM	SLC35A1, CST, CDG2F	P78382	Solute carrier family 35 (CMP-sialic acid transporter), member 1	Updated April 12, 2019	April 14, 2019
OMIM	PDSS2, DLP1, C6orf210, COQ10D3	Q86YH6	Prenyl diphosphate synthase, subunit 2	Updated April 12, 2019	April 14, 2019
OMIM	ESR1, ESR, ESTRR	P03372	Estrogen receptor 1	Updated April 12, 2019	April 14, 2019
OMIM	ANLN, FSFS8	Q9NQW6	Actin-binding protein anillin	Updated April 12, 2019	April 14, 2019
OMIM	MAGI2, AIP1, KIAA0705, NPHS15	Q86UL8	Membrane-associated guanylate kinase, WW and PDZ domains-containing, 2	Updated April 12, 2019	April 14, 2019
OMIM	CYP3A5, P450PCN3	P20815	Cytochrome P450, subfamily IIIA, polypeptide 5	Updated April 12, 2019	April 14, 2019
OMIM	LR8	Q3YBM2	LR8 protein	Updated April 12, 2019	April 14, 2019
OMIM	TEM176A, HCA112, GS188	Q96HP8	Transmembrane protein 176A	Updated April 12, 2019	April 14, 2019
OMIM	NOS3	P29474	Nitric oxide synthase 3, endothelial cell	Updated April 12, 2019	April 14, 2019
OMIM	KHDRBS3, TSTAR, SALP, SLM2, ETOILE	O75525	KH domain-containing, RNA-binding, signal transduction-associated protein 3	Updated April 12, 2019	April 14, 2019
OMIM	GNE, GLCNE, IBM2, DMRV, NM	Q9Y223	UDP-N-acetylglucosamine 2-epimerase/N-acetylmannosamine kinase	Updated April 12, 2019	April 14, 2019
OMIM	CTSL	P07711	Cathepsin L	Updated April 12, 2019	April 14, 2019
OMIM	PTCH1, NBCCS, BCNS, HPE7	Q13635	Patched, Drosophila, homolog of	Updated April 12, 2019	April 14, 2019
OMIM	AMBP, ITIL, ITI, HCP	P02760	Alpha-1-microglobulin/bikunin precursor (inter-alpha-trypsin inhibitor, light chain; protein HC)	Updated April 12, 2019	April 14, 2019
OMIM	GSN	P06396	Gelsolin	Updated April 12, 2019	April 14, 2019
OMIM	LMX1B, NPS1	O60663	LIM homeo box transcription factor 1, beta	Updated April 12, 2019	April 14, 2019
OMIM	ADAMTS13, VWFCP, TTP	Q76LX8	A disintegrin-like and metalloprotease with thrombospondin type 1 motif, 13	Updated April 12, 2019	April 14, 2019
OMIM	GATA3, HDR, HDRS	P23771	GATA-binding protein-3	Updated April 12, 2019	April 14, 2019
OMIM	CUBN, IFCR, MGA1	O60494	Cubilin (intrinsic factor-cobalamin receptor)	Updated April 12, 2019	April 14, 2019
OMIM	RET, MEN2A, HSCR1	P07949	RET transforming sequence; oncogene RET	Updated April 12, 2019	April 14, 2019
OMIM	ERCC6, CKN2, COFS1, CSB, ARMD5, UVSS1, POF11	P0DP91	Excision repair cross complementing rodent repair deficiency, complementation group 6	Updated April 12, 2019	April 14, 2019
OMIM	SGPL1, SPL, NPHS14	O95470	Sphingosine-1-phosphate lyase 1	Updated April 12, 2019	April 14, 2019
OMIM	PLCE1, KIAA1516, NPHS3	Q9P212	Phospholipase C, epsilon-1	Updated April 12, 2019	April 14, 2019
OMIM	HPSE2, HPA2, UFS1	Q8WWQ2	Heparanase 2	Updated April 12, 2019	April 14, 2019
OMIM	PAX2, PAPRS, FSGS7	Q02962	Paired box homeotic gene-2	Updated April 12, 2019	April 14, 2019
OMIM	SUFU, SUFUXL, SUFUH, JBTS32	Q9UMX1	Suppressor of fused	Updated April 12, 2019	April 14, 2019
OMIM	CD151, PETA3, SFA1, MER2	P48509	CD151 antigen	Updated April 12, 2019	April 14, 2019
OMIM	CD81, TAPA1, CVID6	P60033	CD81 antigen (target of antiproliferative antibody-1)	Updated April 12, 2019	April 14, 2019
OMIM	WT1, NPHS4	P19544	Wilms tumor-1	Updated April 12, 2019	April 14, 2019
OMIM	EXT2, SSMS	Q93063	Exostosin 2	Updated April 12, 2019	April 14, 2019
OMIM	NUP160, KIAA0197, NPHS19	Q12769	Nucleoporin, 160kD	Updated April 12, 2019	April 14, 2019
OMIM	GIF, IF	P27352	Gastric intrinsic factor	Updated April 12, 2019	April 14, 2019
OMIM	COX8A	P10176	Cytochrome c oxidase, subunit VIIIA	Updated April 12, 2019	April 14, 2019
OMIM	TRPC6, TRP6, FSGS2	Q9Y210	Transient receptor potential channel-6	Updated April 12, 2019	April 14, 2019
OMIM	SDHD, PGL1	O14521	Succinate dehydrogenase complex, subunit D, integral membrane protein	Updated April 12, 2019	April 14, 2019
OMIM	APOA1	P02647	Apolipoprotein A-I	Updated April 12, 2019	April 14, 2019
OMIM	SLC37A4, G6PT1	O43826	Solute carrier family 37 (glucose-6-phosphate transporter), member 4	Updated April 12, 2019	April 14, 2019
OMIM	TNFRSF1A, TNFR1, TNFAR, FPF, MS5	P19438	Tumor necrosis factor receptor superfamily, member 1A	Updated April 12, 2019	April 14, 2019
OMIM	SCNN1A, BESC2, LIDLS3	P37088	Sodium channel, nonvoltage-gated 1, alpha	Updated April 12, 2019	April 14, 2019
OMIM	GNB3, CSNB1H	P16520	Guanine nucleotide-binding protein, beta polypeptide-3	Updated April 12, 2019	April 14, 2019
OMIM	PTPRO, GLEPP1, NPHS6	Q16827	Protein tyrosine phosphatase, receptor type, O	Updated April 12, 2019	April 14, 2019
OMIM	COX14, C12orf62	Q96I36	Cytochrome c oxidase assembly protein COX14	Updated April 12, 2019	April 14, 2019
OMIM	NUP107, NUP84, NPHS11, ODG6; GAMOS7	P57740	Nucleoporin, 107kD	Updated April 12, 2019	April 14, 2019
OMIM	LYZ	P61626	Lysozyme	Updated April 12, 2019	April 14, 2019
OMIM	VPS33A, MPSPS	Q96AX1	Vacuolar protein sorting 33, yeast, homolog of, A	Updated April 12, 2019	April 14, 2019
OMIM	FLT1	P17948	fms-related tyrosine kinase-1 (vascular endothelial growth factor/vascular permeability factor receptor)	Updated April 12, 2019	April 14, 2019
OMIM	ATP7B, WND	P35670	ATPase, Cu++ transporting, beta polypeptide	Updated April 12, 2019	April 14, 2019
OMIM	SPRY2, IGAN3	O43597	Sprouty, Drosophila, homolog of, 2	Updated April 12, 2019	April 14, 2019
OMIM	TNFSF13B, BLYS, BAFF	Q9Y275	Tumor necrosis factor ligand superfamily, member 13B	Updated April 12, 2019	April 14, 2019
OMIM	OSGEP, FLJ20411, GAMOS3	Q9NPF4	O-sialoglycoprotein endopeptidase	Updated April 12, 2019	April 14, 2019
OMIM	MGAT2, CDGS2, CDG2A	Q10469	Mannosyl (alpha-1,6-)-glycoprotein beta-1,2-N-acetylglucosaminyl- transferase	Updated April 12, 2019	April 14, 2019
OMIM	MAX	P61244	MAX protein	Updated April 12, 2019	April 14, 2019
OMIM	COQ6, CGI10, COQ10D6	Q9Y2Z9	Coq6, S. cerevisiae, homolog of	Updated April 12, 2019	April 14, 2019
OMIM	PGF, PLGF	P49763	Placental growth factor, vascular endothelial growth factor-related protein	Updated April 12, 2019	April 14, 2019
OMIM	AMN	Q9BXJ7	Amnionless, mouse, homolog of	Updated April 12, 2019	April 14, 2019
OMIM	APOPT1, APOP	Q96IL0	Apoptogenic protein 1, mitochondrial	Updated April 12, 2019	April 14, 2019
OMIM	INF2, FSGS5, C14orf173, CMTDIE	Q27J81	Inverted formin 2	Updated April 12, 2019	April 14, 2019
OMIM	FAN1, MTMR15, KIAA1018, KMIN	Q9Y2M0	FANCD2/FANCI-associated nuclease 1	Updated April 12, 2019	April 14, 2019
OMIM	B2M, IMD43	P61769	Beta-2-microglobulin	Updated April 12, 2019	April 14, 2019
OMIM	SLC12A1, NKCC2	Q13621	Solute carrier family 12 (sodium/potassium/chloride transporters), member 1	Updated April 12, 2019	April 14, 2019
OMIM	MYO1E, MYO1C, FSGS6	Q12965	Myosin IE	Updated April 12, 2019	April 14, 2019
OMIM	PSTPIP1, PSTPIP, CD2BP1, PAPAS	O43586	Proline-serine-threonine phosphatase-interacting protein 1	Updated April 12, 2019	April 14, 2019
OMIM	WDR73, HSPC264, GAMOS1	Q6P4I2	WD repeat-containing protein 73	Updated April 12, 2019	April 14, 2019
OMIM	VPS33B	Q9H267	Vacuolar protein sorting 33, yeast, homolog of, B	Updated April 12, 2019	April 14, 2019
OMIM	PKD1	P98161	Polycystin-1	Updated April 12, 2019	April 14, 2019
OMIM	MEFV, MEF, FMF	O15553	Pyrin (marenostrin)	Updated April 12, 2019	April 14, 2019
OMIM	DNASE1, DNL1	P24855	Deoxyribonuclease I	Updated April 12, 2019	April 14, 2019
OMIM	PMM2, CDG1A	O15305	Phosphomannomutase 2	Updated April 12, 2019	April 14, 2019
OMIM	ERCC4, XPF, FANCQ, XFEPS	Q92889	Excision-repair, complementing defective, in Chinese hamster, number 4	Updated April 12, 2019	April 14, 2019
OMIM	UMOD, HNFJ1, FJHN, MCKD2, ADMCKD2	P07911	Uromodulin (uromucoid, Tamm-Horsfall glycoprotein)	Updated April 12, 2019	April 14, 2019
OMIM	COG7, CDG2E	P83436	Component of oligomeric golgi complex 7	Updated April 12, 2019	April 14, 2019
OMIM	LCAT	P04180	Lecithin-cholesterol acyltransferase	Updated April 12, 2019	April 14, 2019
OMIM	MAF, CCA4, CTRCT21, AYGRP	O75444	v-Maf avian musculoaponeurotic fibrosarcoma oncogene homolog	Updated April 12, 2019	April 14, 2019
OMIM	FOXC2, FKHL14, MFH1	Q99958	Forkhead box C2	Updated April 12, 2019	April 14, 2019
OMIM	DPH1, DPH2L1, OVCA1, DEDSSH	Q9BZG8	Diphthamide biosynthesis protein 1	Updated April 12, 2019	April 14, 2019
OMIM	CTNS	O60931	Cystinosin	Updated April 12, 2019	April 14, 2019
OMIM	SCO1, SCOD1	O75880	SCO1 cytochrome c oxidase assembly protein	Updated April 12, 2019	April 14, 2019
OMIM	COX10	Q12887	Cytochrome c oxidase, subunit X	Updated April 12, 2019	April 14, 2019
OMIM	TNFRSF13B, TACI, CVID2	O14836	Tumor necrosis factor receptor superfamily, member 13B	Updated April 12, 2019	April 14, 2019
OMIM	NOS2A, NOS2	P35228	Nitric oxide synthase 2A, inducible, hepatocytes	Updated April 12, 2019	April 14, 2019
OMIM	CCL13, SCYA13, NCC1	Q99616	Chemokine, C-C motif, ligand 13	Updated April 12, 2019	April 14, 2019
OMIM	HNF1B, TCF2, HNF2, MODY5, FJHN, HPC11	P35680	HNF1 homeobox B (transcription factor 2)	Updated April 12, 2019	April 14, 2019
OMIM	G6PC, G6PT	P35575	Glucose-6-phosphatase, catalytic	Updated April 12, 2019	April 14, 2019
OMIM	ITGA3, CD49C, GAPB3, ILNEB	P26006	Integrin, alpha-3	Updated April 12, 2019	April 14, 2019
OMIM	DGKE, NPHS7, AHUS7	P52429	Diacylglycerol kinase, epsilon, 64-kD	Updated April 12, 2019	April 14, 2019
OMIM	ACE, DCP1, ACE1, MVCD3, ICH	P12821	Angiotensin I converting enzyme (dipeptidyl carboxypeptidase-1)	Updated April 12, 2019	April 14, 2019
OMIM	TACO1, CCDC44	Q9BSH4	Translational activator of mitochondrially encoded cytochrome c oxidase subunit I	Updated April 12, 2019	April 14, 2019
OMIM	NUP85, PCNT1, PCNT, NPHS17	Q9BW27	Nucleoporin 85kD	Updated April 12, 2019	April 14, 2019
OMIM	ARHGDIA, GDIA1, NPHS8	P52565	Rho GDP dissociation inhibitor (GDI) alpha	Updated April 12, 2019	April 14, 2019
OMIM	C3, ARMD9, AHUS5	P01024	Complement component-3	Updated April 12, 2019	April 14, 2019
OMIM	PET100, C19orf79	P0DJ07	PET100, S. cerevisiae, homolog of	Updated April 12, 2019	April 14, 2019
OMIM	DNM2, CMTDIB, CMTDI1, CMT2M, LCCS5	P50570	Dynamin-2	Updated April 12, 2019	April 14, 2019
OMIM	KANK2, ANKRD25, KIAA1518, PPKWH, NPHS16	Q63ZY3	KN motif- and ankyrin repeat domain-containing protein 2	Updated April 12, 2019	April 14, 2019
OMIM	RGS19IP1, C19orf3, GIPC	O14908	Regulator of G-protein signaling 19 interacting protein 1	Updated April 12, 2019	April 14, 2019
OMIM	COX6B1	P14854	Cytochrome c oxidase, subunit VIb polypeptide 1 (ubiquitous)	Updated April 12, 2019	April 14, 2019
OMIM	NPHS1, NPHN	O60500	Nephrin	Updated April 12, 2019	April 14, 2019
OMIM	ACTN4, FSGS1, FSGS	O43707	Actinin, alpha-4	Updated April 12, 2019	April 14, 2019
OMIM	SARS2	Q9NP81	Seryl-tRNA synthetase 2	Updated April 12, 2019	April 14, 2019
OMIM	COQ8B, ADCK4, NPHS9	Q96D53	Coenzyme Q8B	Updated April 12, 2019	April 14, 2019
OMIM	TGFB1, DPD1, CED, IBDIMDE	P01137	Transforming growth factor, beta-1	Updated April 12, 2019	April 14, 2019
OMIM	PLAUR, URKR	Q03405	Plasminogen activator, urokinase, receptor	Updated April 12, 2019	April 14, 2019
OMIM	APOE, AD2, LPG, LDLCQ5	P02649	Apolipoprotein E	Updated April 12, 2019	April 14, 2019
