# Supplementary material for: Identifying Synergistic Mechanisms of Multiple Ingredients in Shuangbai Tablets against Proteinuria by Virtual Screening and a Network Pharmacology Approach
Source: Evid Based Complement Alternat Med. 2020 Jan 6;2020:1027271. doi: 10.1155/2020/1027271 (PMC6984745; doi:10.1155/2020/1027271)
Supplement: Supplementary Materials — Supplementary Table 1: 118 active ingredients in Shuangbai Tablets. Supplementary Table 2: 8981 targets of the active ingredients in Shuangbai Tablets. Supplementary Table 3: 110 523 genes associated with proteinuria. Supplementary Table 4: candidate targets with therapeutic proteinuria. Supplementary Table 5: 172 pairs of protein interactions of candidate targets. Supplementary Table 6: specific analytical parameters of 41 central targets. [file 1027271.f1.zip › 1027271.f1/Table 4-Candidate target.xlsx]

## Sheet: Sheet1
Target	Common name	Uniprot ID
Glucocorticoid receptor	NR3C1	P04150
11-beta-hydroxysteroid dehydrogenase 2	HSD11B2	P80365
11-beta-hydroxysteroid dehydrogenase 1	HSD11B1	P28845
Type-1 angiotensin II receptor	AGTR1	P30556
Nuclear receptor subfamily 4 group A member 1	NR4A1	P22736
Dipeptidyl peptidase IV	DPP4	P27487
Peroxisome proliferator-activated receptor alpha	PPARA	Q07869
Cyclooxygenase-2	PTGS2	P35354
Superoxide dismutase	SOD1	P00441
Interferon gamma	IFNG	P01579
Beta-glucuronidase	GUSB	P08236
Cathepsin L	CTSL	P07711
Cathepsin (B and K)	CTSB	P07858
Vascular endothelial growth factor A	VEGFA	P15692
5-lipoxygenase activating protein	ALOX5AP	P20292
Osteopontin	SPP1	P10451
Serum albumin	ALB	P02768
Renin	REN	P00797
Angiotensin-converting enzyme	ACE	P12821
Intercellular adhesion molecule 1	ICAM1	P05362
C-X-C motif chemokine 10	CXCL10	P02778
Tyrosine-protein kinase ZAP-70	ZAP70	P43403
Uncharacterized aarF domain-containing protein kinase 4	COQ8B	Q96D53
Short transient receptor potential channel 6	TRPC6	Q9Y210
Von Hippel-Lindau disease tumor suppressor/Elongin B/Elongin C	VHL	P40337
Lysozyme	LYZ	P61626
Fibronectin	FN1	P02751
Heme oxygenase 1	HMOX1	P09601
Insulin receptor	INSR	P06213
Peroxisomal bifunctional enzyme	EHHADH	Q08426
LIM domain kinase 1	LIMK1	P53667
Leukocyte proteinase 3	PRTN3	P24158
Kinesin-1 heavy chain/ Tyrosine-protein kinase receptor RET	RET	P07949
Heparanase	HPSE	Q9Y251
Coagulation factor VII/tissue factor	F3	P13726
Mineralocorticoid receptor	NR3C2	P08235
Angiotensin-converting enzyme 2	ACE2	Q9BYF1
Serine/threonine-protein kinase mTOR	MTOR	P42345
Endothelin-converting enzyme 1	ECE1	P42892
Estrogen receptor	ESR1	P03372
Nitric-oxide synthase, endothelial	NOS3	P29474
Nitric oxide synthase, inducible	NOS2	P35228
Vascular endothelial growth factor receptor 1	FLT1	P17948
P-selectin	SELP	P16109
CD81 antigen	CD81	P60033
TNF-alpha	TNF	P01375
Placenta growth factor	PGF	P49763
Alpha-1,6-mannosyl-glycoprotein 2-beta-N-acetylglucosaminyltransferase	MGAT2	Q10469
