# Supplementary material for: Identifying Synergistic Mechanisms of Multiple Ingredients in Shuangbai Tablets against Proteinuria by Virtual Screening and a Network Pharmacology Approach
Source: Evid Based Complement Alternat Med. 2020 Jan 6;2020:1027271. doi: 10.1155/2020/1027271 (PMC6984745; doi:10.1155/2020/1027271)
Supplement: Supplementary Materials — Supplementary Table 1: 118 active ingredients in Shuangbai Tablets. Supplementary Table 2: 8981 targets of the active ingredients in Shuangbai Tablets. Supplementary Table 3: 110 523 genes associated with proteinuria. Supplementary Table 4: candidate targets with therapeutic proteinuria. Supplementary Table 5: 172 pairs of protein interactions of candidate targets. Supplementary Table 6: specific analytical parameters of 41 central targets. [file 1027271.f1.zip › 1027271.f1/Table 5-Candidate target-related genes.xlsx]

## Sheet: Sheet1
node1	node2	node1_string_internal_id	node2_string_internal_id	node1_external_id	node2_external_id	neighborhood_on_chromosome	gene_fusion	phylogenetic_cooccurrence	homology	coexpression	experimentally_determined_interaction	database_annotated	automated_textmining	combined_score
VEGFA	FLT1	4451310	4436489	9606.ENSP00000478570	9606.ENSP00000282397	0	0	0	0	0.061	0.556	0.9	0.984	0.999
FLT1	NRP1	4436489	4435594	9606.ENSP00000282397	9606.ENSP00000265371	0	0	0	0	0.062	0.716	0.9	0.848	0.995
VEGFA	NRP1	4451310	4435594	9606.ENSP00000478570	9606.ENSP00000265371	0	0	0	0	0.061	0.599	0.9	0.899	0.995
VEGFA	NOS3	4451310	4437409	9606.ENSP00000478570	9606.ENSP00000297494	0	0	0	0	0.062	0	0.9	0.934	0.993
FN1	ALB	4441661	4437206	9606.ENSP00000346839	9606.ENSP00000295897	0	0	0	0	0.077	0.104	0.9	0.899	0.99
VEGFA	FN1	4451310	4441661	9606.ENSP00000478570	9606.ENSP00000346839	0	0	0	0	0.076	0	0.9	0.88	0.988
VEGFA	ALB	4451310	4437206	9606.ENSP00000478570	9606.ENSP00000295897	0	0	0	0	0.062	0	0.9	0.871	0.986
SPP1	ALB	4446370	4437206	9606.ENSP00000378517	9606.ENSP00000295897	0	0	0	0	0.076	0	0.9	0.789	0.978
SPP1	FN1	4446370	4441661	9606.ENSP00000378517	9606.ENSP00000346839	0	0	0	0	0.102	0	0.9	0.769	0.977
VEGFA	VHL	4451310	4434489	9606.ENSP00000478570	9606.ENSP00000256474	0	0	0	0	0	0.186	0.9	0.67	0.97
ACE	REN	4436887	4436004	9606.ENSP00000290866	9606.ENSP00000272190	0	0	0	0	0	0	0	0.959	0.959
AGTR1	REN	4449040	4436004	9606.ENSP00000419422	9606.ENSP00000272190	0	0	0	0	0.055	0	0	0.954	0.955
PPARA	EHHADH	4447242	4433550	9606.ENSP00000385523	9606.ENSP00000231887	0	0	0	0	0.064	0	0.9	0.558	0.955
ACE2	REN	4447602	4436004	9606.ENSP00000389326	9606.ENSP00000272190	0	0	0	0	0.061	0	0	0.949	0.95
NR3C2	NR3C1	4442077	4433539	9606.ENSP00000350815	9606.ENSP00000231509	0	0	0	0.861	0	0.379	0.9	0.942	0.943
ACE2	DPP4	4447602	4442387	9606.ENSP00000389326	9606.ENSP00000353731	0	0	0	0	0.061	0	0.8	0.717	0.942
AGTR1	ACE	4449040	4436887	9606.ENSP00000419422	9606.ENSP00000290866	0	0	0	0	0.06	0	0	0.927	0.928
LYZ	PRTN3	4434847	4433625	9606.ENSP00000261267	9606.ENSP00000234347	0	0	0	0	0.076	0	0.9	0.268	0.926
VEGFA	PTGS2	4451310	4442894	9606.ENSP00000478570	9606.ENSP00000356438	0	0	0	0	0.082	0	0	0.914	0.918
HPSE	LYZ	4447096	4434847	9606.ENSP00000384262	9606.ENSP00000261267	0	0	0	0	0.061	0	0.9	0.121	0.91
LIMK1	NRP1	4440726	4435594	9606.ENSP00000336740	9606.ENSP00000265371	0	0	0	0	0	0	0.9	0.126	0.908
GUSB	PRTN3	4437888	4433625	9606.ENSP00000302728	9606.ENSP00000234347	0	0	0	0	0	0	0.9	0.116	0.907
GUSB	LYZ	4437888	4434847	9606.ENSP00000302728	9606.ENSP00000261267	0	0	0	0	0.072	0	0.9	0.07	0.906
CTSB	CTSL	4441541	4441511	9606.ENSP00000345672	9606.ENSP00000345344	0	0	0.27	0.652	0.243	0.05	0.8	0.951	0.904
AGTR1	ACE2	4449040	4447602	9606.ENSP00000419422	9606.ENSP00000389326	0	0	0	0	0.06	0	0	0.901	0.904
CXCL10	IFNG	4438146	4433446	9606.ENSP00000305651	9606.ENSP00000229135	0	0	0	0	0.118	0	0	0.893	0.902
VEGFA	ICAM1	4451310	4435501	9606.ENSP00000478570	9606.ENSP00000264832	0	0	0	0	0	0	0	0.89	0.89
VEGFA	SPP1	4451310	4446370	9606.ENSP00000478570	9606.ENSP00000378517	0	0	0	0	0	0	0	0.882	0.882
NOS3	ACE	4437409	4436887	9606.ENSP00000297494	9606.ENSP00000290866	0	0	0	0	0.062	0	0	0.876	0.878
ICAM1	IFNG	4435501	4433446	9606.ENSP00000264832	9606.ENSP00000229135	0	0	0	0	0	0	0	0.87	0.87
VEGFA	HMOX1	4451310	4432912	9606.ENSP00000478570	9606.ENSP00000216117	0	0	0	0	0	0	0	0.867	0.867
NOS3	HMOX1	4437409	4432912	9606.ENSP00000297494	9606.ENSP00000216117	0	0	0	0	0	0.185	0	0.829	0.855
NR3C2	REN	4442077	4436004	9606.ENSP00000350815	9606.ENSP00000272190	0	0	0	0	0	0	0	0.845	0.845
NOS3	REN	4437409	4436004	9606.ENSP00000297494	9606.ENSP00000272190	0	0	0	0	0.061	0	0	0.836	0.839
ALB	ACE	4437206	4436887	9606.ENSP00000295897	9606.ENSP00000290866	0	0	0	0	0	0	0	0.838	0.838
NR3C2	HSD11B2	4442077	4439082	9606.ENSP00000350815	9606.ENSP00000316786	0	0	0	0	0	0.05	0	0.834	0.836
PTGS2	NOS3	4442894	4437409	9606.ENSP00000356438	9606.ENSP00000297494	0	0	0	0	0	0.261	0	0.786	0.835
PTGS2	HMOX1	4442894	4432912	9606.ENSP00000356438	9606.ENSP00000216117	0	0	0	0	0.076	0	0	0.827	0.834
FN1	ICAM1	4441661	4435501	9606.ENSP00000346839	9606.ENSP00000264832	0	0	0	0	0.063	0	0	0.814	0.819
VEGFA	F3	4451310	4440531	9606.ENSP00000478570	9606.ENSP00000334145	0	0	0	0	0.061	0	0	0.81	0.814
NR3C2	ACE	4442077	4436887	9606.ENSP00000350815	9606.ENSP00000290866	0	0	0	0	0.062	0	0	0.807	0.811
ALB	ICAM1	4437206	4435501	9606.ENSP00000295897	9606.ENSP00000264832	0	0	0	0	0	0	0	0.806	0.807
ALB	REN	4437206	4436004	9606.ENSP00000295897	9606.ENSP00000272190	0	0	0	0	0.095	0	0	0.793	0.804
VEGFA	ACE	4451310	4436887	9606.ENSP00000478570	9606.ENSP00000290866	0	0	0	0	0.064	0	0	0.793	0.798
PTGS2	ALB	4442894	4437206	9606.ENSP00000356438	9606.ENSP00000295897	0	0	0	0	0	0	0	0.797	0.797
AGTR1	NOS3	4449040	4437409	9606.ENSP00000419422	9606.ENSP00000297494	0	0	0	0	0.061	0.379	0	0.676	0.794
DPP4	FN1	4442387	4441661	9606.ENSP00000353731	9606.ENSP00000346839	0	0	0	0	0.044	0.266	0	0.702	0.773
HSD11B1	NR3C1	4442791	4433539	9606.ENSP00000355995	9606.ENSP00000231509	0	0	0	0	0.061	0	0	0.749	0.754
FN1	NOS3	4441661	4437409	9606.ENSP00000346839	9606.ENSP00000297494	0	0	0	0	0	0	0	0.749	0.749
PTGS2	FN1	4442894	4441661	9606.ENSP00000356438	9606.ENSP00000346839	0	0	0	0	0.061	0	0	0.738	0.744
VEGFA	RET	4451310	4441779	9606.ENSP00000478570	9606.ENSP00000347942	0	0	0	0	0	0.174	0	0.7	0.741
VEGFA	AGTR1	4451310	4449040	9606.ENSP00000478570	9606.ENSP00000419422	0	0	0	0	0.061	0	0	0.733	0.739
F3	ALB	4440531	4437206	9606.ENSP00000334145	9606.ENSP00000295897	0	0	0	0	0	0	0	0.734	0.734
CXCL10	ICAM1	4438146	4435501	9606.ENSP00000305651	9606.ENSP00000264832	0	0	0	0	0.145	0	0	0.7	0.732
SOD1	HMOX1	4435927	4432912	9606.ENSP00000270142	9606.ENSP00000216117	0	0	0	0	0	0	0	0.728	0.728
VEGFA	CXCL10	4451310	4438146	9606.ENSP00000478570	9606.ENSP00000305651	0	0	0	0	0	0	0	0.722	0.722
HSD11B1	NR3C2	4442791	4442077	9606.ENSP00000355995	9606.ENSP00000350815	0	0	0	0	0.084	0	0	0.708	0.721
SPP1	ICAM1	4446370	4435501	9606.ENSP00000378517	9606.ENSP00000264832	0	0	0	0	0	0	0	0.719	0.719
VEGFA	SOD1	4451310	4435927	9606.ENSP00000478570	9606.ENSP00000270142	0	0	0	0	0.063	0	0	0.709	0.716
DPP4	ACE	4442387	4436887	9606.ENSP00000353731	9606.ENSP00000290866	0	0	0	0	0	0	0	0.709	0.709
HSD11B2	NR3C1	4439082	4433539	9606.ENSP00000316786	9606.ENSP00000231509	0	0	0	0	0	0.05	0	0.706	0.709
PTGS2	ICAM1	4442894	4435501	9606.ENSP00000356438	9606.ENSP00000264832	0	0	0	0	0.123	0	0	0.677	0.705
NOS3	ICAM1	4437409	4435501	9606.ENSP00000297494	9606.ENSP00000264832	0	0	0	0	0	0	0	0.705	0.705
VEGFA	INSR	4451310	4437994	9606.ENSP00000478570	9606.ENSP00000303830	0	0	0	0	0.061	0	0.6	0.269	0.701
VEGFA	CTSB	4451310	4441541	9606.ENSP00000478570	9606.ENSP00000345672	0	0	0	0	0.057	0	0	0.691	0.696
FN1	IFNG	4441661	4433446	9606.ENSP00000346839	9606.ENSP00000229135	0	0	0	0	0	0	0	0.695	0.695
PPARA	PTGS2	4447242	4442894	9606.ENSP00000385523	9606.ENSP00000356438	0	0	0	0	0	0.05	0	0.686	0.689
NOS3	ALB	4437409	4437206	9606.ENSP00000297494	9606.ENSP00000295897	0	0	0	0	0.059	0	0	0.671	0.677
F3	ICAM1	4440531	4435501	9606.ENSP00000334145	9606.ENSP00000264832	0	0	0	0	0	0	0	0.676	0.676
DPP4	ALB	4442387	4437206	9606.ENSP00000353731	9606.ENSP00000295897	0	0	0	0	0.063	0	0	0.663	0.671
IFNG	HMOX1	4433446	4432912	9606.ENSP00000229135	9606.ENSP00000216117	0	0	0	0	0	0	0	0.67	0.67
VEGFA	IFNG	4451310	4433446	9606.ENSP00000478570	9606.ENSP00000229135	0	0	0	0	0	0	0	0.669	0.669
AGTR1	NR3C2	4449040	4442077	9606.ENSP00000419422	9606.ENSP00000350815	0	0	0	0	0	0	0	0.668	0.668
DPP4	NOS3	4442387	4437409	9606.ENSP00000353731	9606.ENSP00000297494	0.046	0	0	0	0	0	0	0.656	0.658
VEGFA	REN	4451310	4436004	9606.ENSP00000478570	9606.ENSP00000272190	0	0	0	0	0	0	0	0.657	0.657
ALB	IFNG	4437206	4433446	9606.ENSP00000295897	9606.ENSP00000229135	0	0	0	0	0	0	0	0.657	0.657
ALB	HMOX1	4437206	4432912	9606.ENSP00000295897	9606.ENSP00000216117	0	0	0	0	0	0	0	0.656	0.656
ICAM1	HMOX1	4435501	4432912	9606.ENSP00000264832	9606.ENSP00000216117	0	0	0	0	0.077	0	0	0.64	0.653
PPARA	NOS3	4447242	4437409	9606.ENSP00000385523	9606.ENSP00000297494	0	0	0	0	0.061	0.091	0	0.624	0.651
CXCL10	HMOX1	4438146	4432912	9606.ENSP00000305651	9606.ENSP00000216117	0	0	0	0	0.065	0	0	0.641	0.65
VEGFA	DPP4	4451310	4442387	9606.ENSP00000478570	9606.ENSP00000353731	0	0	0	0	0	0	0	0.643	0.643
NOS3	FLT1	4437409	4436489	9606.ENSP00000297494	9606.ENSP00000282397	0	0	0	0	0.061	0	0	0.631	0.638
VEGFA	CTSL	4451310	4441511	9606.ENSP00000478570	9606.ENSP00000345344	0	0	0	0	0.086	0	0	0.617	0.635
AGTR1	PTGS2	4449040	4442894	9606.ENSP00000419422	9606.ENSP00000356438	0	0	0	0	0	0.388	0	0.425	0.633
NOS3	NR3C1	4437409	4433539	9606.ENSP00000297494	9606.ENSP00000231509	0	0	0	0	0	0.091	0	0.608	0.629
VEGFA	NR4A1	4451310	4449965	9606.ENSP00000478570	9606.ENSP00000440864	0	0	0	0	0	0	0	0.627	0.627
PTGS2	REN	4442894	4436004	9606.ENSP00000356438	9606.ENSP00000272190	0	0	0	0	0.088	0	0	0.605	0.625
VEGFA	ECE1	4451310	4444471	9606.ENSP00000478570	9606.ENSP00000364028	0	0	0	0	0.081	0	0	0.606	0.623
ALB	NR3C1	4437206	4433539	9606.ENSP00000295897	9606.ENSP00000231509	0	0	0	0	0.052	0.165	0	0.556	0.617
ALB	SOD1	4437206	4435927	9606.ENSP00000295897	9606.ENSP00000270142	0	0	0	0	0	0.126	0	0.573	0.611
CTSB	REN	4441541	4436004	9606.ENSP00000345672	9606.ENSP00000272190	0	0	0	0	0.062	0.404	0	0.358	0.61
SPP1	HMOX1	4446370	4432912	9606.ENSP00000378517	9606.ENSP00000216117	0	0	0	0	0.061	0	0	0.6	0.608
ALB	LYZ	4437206	4434847	9606.ENSP00000295897	9606.ENSP00000261267	0	0	0	0	0.092	0	0	0.583	0.605
FN1	ACE	4441661	4436887	9606.ENSP00000346839	9606.ENSP00000290866	0	0	0	0	0	0	0	0.604	0.604
CTSB	ALB	4441541	4437206	9606.ENSP00000345672	9606.ENSP00000295897	0	0	0	0	0	0	0	0.604	0.604
FN1	REN	4441661	4436004	9606.ENSP00000346839	9606.ENSP00000272190	0	0	0	0	0	0	0	0.6	0.6
VEGFA	HPSE	4451310	4447096	9606.ENSP00000478570	9606.ENSP00000384262	0	0	0	0	0	0	0	0.599	0.599
PTGS2	IFNG	4442894	4433446	9606.ENSP00000356438	9606.ENSP00000229135	0	0	0	0	0	0	0	0.594	0.594
ACE	ICAM1	4436887	4435501	9606.ENSP00000290866	9606.ENSP00000264832	0	0	0	0	0	0	0	0.593	0.593
HSD11B2	REN	4439082	4436004	9606.ENSP00000316786	9606.ENSP00000272190	0	0	0	0	0	0	0	0.589	0.589
NOS3	SOD1	4437409	4435927	9606.ENSP00000297494	9606.ENSP00000270142	0	0	0	0	0	0	0	0.584	0.584
FN1	FLT1	4441661	4436489	9606.ENSP00000346839	9606.ENSP00000282397	0	0	0	0	0.061	0	0	0.574	0.583
DPP4	CXCL10	4442387	4438146	9606.ENSP00000353731	9606.ENSP00000305651	0	0	0	0	0	0.342	0	0.39	0.581
FN1	VHL	4441661	4434489	9606.ENSP00000346839	9606.ENSP00000256474	0	0	0	0	0	0.379	0	0.349	0.578
PTGS2	CXCL10	4442894	4438146	9606.ENSP00000356438	9606.ENSP00000305651	0	0	0	0	0.107	0	0	0.54	0.572
AGTR1	ALB	4449040	4437206	9606.ENSP00000419422	9606.ENSP00000295897	0	0	0	0	0.064	0	0	0.555	0.565
ACE2	NOS3	4447602	4437409	9606.ENSP00000389326	9606.ENSP00000297494	0	0	0	0	0.059	0	0	0.556	0.564
ALB	PRTN3	4437206	4433625	9606.ENSP00000295897	9606.ENSP00000234347	0	0	0	0	0.054	0	0	0.558	0.563
PTGS2	ACE	4442894	4436887	9606.ENSP00000356438	9606.ENSP00000290866	0	0	0	0	0.064	0	0	0.549	0.56
F3	ACE	4440531	4436887	9606.ENSP00000334145	9606.ENSP00000290866	0	0	0	0	0	0	0	0.558	0.558
F3	NOS3	4440531	4437409	9606.ENSP00000334145	9606.ENSP00000297494	0	0	0	0	0	0	0	0.557	0.557
ALB	FLT1	4437206	4436489	9606.ENSP00000295897	9606.ENSP00000282397	0	0	0	0	0	0	0	0.557	0.557
ECE1	ACE	4444471	4436887	9606.ENSP00000364028	9606.ENSP00000290866	0	0	0	0	0.063	0	0	0.541	0.552
CTSB	GUSB	4441541	4437888	9606.ENSP00000345672	9606.ENSP00000302728	0	0	0	0	0.064	0	0	0.538	0.549
FLT1	ICAM1	4436489	4435501	9606.ENSP00000282397	9606.ENSP00000264832	0	0	0	0	0.055	0	0	0.54	0.547
FN1	F3	4441661	4440531	9606.ENSP00000346839	9606.ENSP00000334145	0	0	0	0	0.068	0	0	0.533	0.546
CXCL10	ALB	4438146	4437206	9606.ENSP00000305651	9606.ENSP00000295897	0	0	0	0	0	0	0	0.545	0.545
REN	ICAM1	4436004	4435501	9606.ENSP00000272190	9606.ENSP00000264832	0	0	0	0	0	0	0	0.543	0.543
FN1	NRP1	4441661	4435594	9606.ENSP00000346839	9606.ENSP00000265371	0	0	0	0	0.153	0	0	0.471	0.533
CTSL	ALB	4441511	4437206	9606.ENSP00000345344	9606.ENSP00000295897	0	0	0	0	0.062	0.104	0	0.477	0.522
SPP1	PTGS2	4446370	4442894	9606.ENSP00000378517	9606.ENSP00000356438	0	0	0	0	0.062	0	0	0.511	0.521
ACE2	ALB	4447602	4437206	9606.ENSP00000389326	9606.ENSP00000295897	0	0	0	0	0	0	0	0.518	0.518
PPARA	F3	4447242	4440531	9606.ENSP00000385523	9606.ENSP00000334145	0	0	0	0	0	0	0	0.515	0.515
FN1	CTSB	4441661	4441541	9606.ENSP00000346839	9606.ENSP00000345672	0	0	0	0	0.078	0	0	0.492	0.511
SPP1	IFNG	4446370	4433446	9606.ENSP00000378517	9606.ENSP00000229135	0	0	0	0	0	0	0	0.51	0.51
NR3C2	ALB	4442077	4437206	9606.ENSP00000350815	9606.ENSP00000295897	0	0	0	0	0.052	0.074	0	0.483	0.506
GUSB	ALB	4437888	4437206	9606.ENSP00000302728	9606.ENSP00000295897	0	0	0	0	0	0	0	0.505	0.505
ACE	PRTN3	4436887	4433625	9606.ENSP00000290866	9606.ENSP00000234347	0	0	0	0	0.059	0	0	0.495	0.504
AGTR1	FN1	4449040	4441661	9606.ENSP00000419422	9606.ENSP00000346839	0	0	0	0	0.095	0	0	0.473	0.502
DPP4	REN	4442387	4436004	9606.ENSP00000353731	9606.ENSP00000272190	0	0	0	0	0	0	0	0.499	0.499
ALOX5AP	PTGS2	4451430	4442894	9606.ENSP00000479870	9606.ENSP00000356438	0	0	0	0	0.085	0	0	0.474	0.498
PTGS2	NR3C1	4442894	4433539	9606.ENSP00000356438	9606.ENSP00000231509	0	0	0	0	0.069	0.05	0	0.475	0.495
PPARA	SPP1	4447242	4446370	9606.ENSP00000385523	9606.ENSP00000378517	0	0	0	0	0	0	0	0.493	0.493
SPP1	REN	4446370	4436004	9606.ENSP00000378517	9606.ENSP00000272190	0	0	0	0	0	0	0	0.485	0.485
NR3C2	NOS3	4442077	4437409	9606.ENSP00000350815	9606.ENSP00000297494	0	0	0	0	0.061	0.091	0	0.445	0.484
FN1	CTSL	4441661	4441511	9606.ENSP00000346839	9606.ENSP00000345344	0	0	0	0	0.109	0	0	0.441	0.48
ZAP70	ICAM1	4435526	4435501	9606.ENSP00000264972	9606.ENSP00000264832	0	0	0	0	0.052	0	0	0.473	0.479
PTGS2	SOD1	4442894	4435927	9606.ENSP00000356438	9606.ENSP00000270142	0	0	0	0	0.061	0	0	0.467	0.478
PPARA	ALB	4447242	4437206	9606.ENSP00000385523	9606.ENSP00000295897	0	0	0	0	0.064	0.074	0	0.438	0.47
VEGFA	NR3C1	4451310	4433539	9606.ENSP00000478570	9606.ENSP00000231509	0	0	0	0	0	0	0	0.47	0.47
FN1	LIMK1	4441661	4440726	9606.ENSP00000346839	9606.ENSP00000336740	0	0	0	0	0	0.261	0	0.31	0.468
PTGS2	F3	4442894	4440531	9606.ENSP00000356438	9606.ENSP00000334145	0	0	0	0	0.085	0	0	0.441	0.466
SPP1	ACE	4446370	4436887	9606.ENSP00000378517	9606.ENSP00000290866	0	0	0	0	0	0	0	0.465	0.465
SPP1	FLT1	4446370	4436489	9606.ENSP00000378517	9606.ENSP00000282397	0	0	0	0	0.065	0	0	0.441	0.454
FN1	HMOX1	4441661	4432912	9606.ENSP00000346839	9606.ENSP00000216117	0	0	0	0	0.057	0	0	0.443	0.452
REN	NR3C1	4436004	4433539	9606.ENSP00000272190	9606.ENSP00000231509	0	0	0	0	0	0	0	0.452	0.452
SPP1	CXCL10	4446370	4438146	9606.ENSP00000378517	9606.ENSP00000305651	0	0	0	0	0.061	0	0	0.44	0.451
NOS3	IFNG	4437409	4433446	9606.ENSP00000297494	9606.ENSP00000229135	0	0	0	0	0	0	0	0.451	0.451
FN1	ZAP70	4441661	4435526	9606.ENSP00000346839	9606.ENSP00000264972	0	0	0	0	0	0.261	0	0.286	0.449
F3	PRTN3	4440531	4433625	9606.ENSP00000334145	9606.ENSP00000234347	0	0	0	0	0	0	0	0.448	0.448
FN1	CXCL10	4441661	4438146	9606.ENSP00000346839	9606.ENSP00000305651	0	0	0	0	0	0	0	0.448	0.448
RET	FLT1	4441779	4436489	9606.ENSP00000347942	9606.ENSP00000282397	0	0	0	0.644	0	0.261	0	0.721	0.447
ACE2	ECE1	4447602	4444471	9606.ENSP00000389326	9606.ENSP00000364028	0	0	0.264	0	0.055	0	0	0.267	0.445
F3	FLT1	4440531	4436489	9606.ENSP00000334145	9606.ENSP00000282397	0	0	0	0	0	0	0	0.443	0.443
DPP4	ICAM1	4442387	4435501	9606.ENSP00000353731	9606.ENSP00000264832	0	0	0	0	0.061	0	0	0.43	0.441
HSD11B2	ACE	4439082	4436887	9606.ENSP00000316786	9606.ENSP00000290866	0	0	0	0	0.062	0	0	0.425	0.437
REN	HMOX1	4436004	4432912	9606.ENSP00000272190	9606.ENSP00000216117	0	0	0	0	0.063	0	0	0.424	0.437
ACE2	NR3C2	4447602	4442077	9606.ENSP00000389326	9606.ENSP00000350815	0	0	0	0	0.061	0	0	0.425	0.437
FN1	INSR	4441661	4437994	9606.ENSP00000346839	9606.ENSP00000303830	0	0	0	0	0	0.261	0	0.268	0.435
AGTR1	ICAM1	4449040	4435501	9606.ENSP00000419422	9606.ENSP00000264832	0	0	0	0	0.055	0	0	0.426	0.434
F3	REN	4440531	4436004	9606.ENSP00000334145	9606.ENSP00000272190	0	0	0	0	0	0	0	0.433	0.433
FN1	GUSB	4441661	4437888	9606.ENSP00000346839	9606.ENSP00000302728	0	0	0	0	0.061	0	0	0.42	0.432
TRPC6	ALB	4441091	4437206	9606.ENSP00000340913	9606.ENSP00000295897	0	0	0	0	0	0	0	0.43	0.43
PTGS2	FLT1	4442894	4436489	9606.ENSP00000356438	9606.ENSP00000282397	0	0	0	0	0	0	0	0.429	0.429
ACE	HMOX1	4436887	4432912	9606.ENSP00000290866	9606.ENSP00000216117	0	0	0	0	0	0	0	0.42	0.42
TRPC6	ADCK4	4441091	4438973	9606.ENSP00000340913	9606.ENSP00000315118	0	0	0	0	0	0	0	0.42	0.42
F3	IFNG	4440531	4433446	9606.ENSP00000334145	9606.ENSP00000229135	0	0	0	0	0	0	0	0.417	0.416
ACE	LYZ	4436887	4434847	9606.ENSP00000290866	9606.ENSP00000261267	0	0	0	0	0.065	0	0	0.399	0.414
SPP1	NOS3	4446370	4437409	9606.ENSP00000378517	9606.ENSP00000297494	0	0	0	0	0	0	0	0.411	0.41
ALB	NRP1	4437206	4435594	9606.ENSP00000295897	9606.ENSP00000265371	0	0	0	0	0	0	0	0.406	0.406
HPSE	CTSL	4447096	4441511	9606.ENSP00000384262	9606.ENSP00000345344	0	0	0	0	0	0	0	0.4	0.4
ECE1	NOS3	4444471	4437409	9606.ENSP00000364028	9606.ENSP00000297494	0	0	0	0	0	0	0	0.4	0.4
