# Supplementary material for: Identifying Synergistic Mechanisms of Multiple Ingredients in Shuangbai Tablets against Proteinuria by Virtual Screening and a Network Pharmacology Approach
Source: Evid Based Complement Alternat Med. 2020 Jan 6;2020:1027271. doi: 10.1155/2020/1027271 (PMC6984745; doi:10.1155/2020/1027271)
Supplement: Supplementary Materials — Supplementary Table 1: 118 active ingredients in Shuangbai Tablets. Supplementary Table 2: 8981 targets of the active ingredients in Shuangbai Tablets. Supplementary Table 3: 110 523 genes associated with proteinuria. Supplementary Table 4: candidate targets with therapeutic proteinuria. Supplementary Table 5: 172 pairs of protein interactions of candidate targets. Supplementary Table 6: specific analytical parameters of 41 central targets. [file 1027271.f1.zip › 1027271.f1/Table 6-specific analytical parameters of central targets.xlsx]

## Sheet: Table 6-specific analytical par
SUID	AverageShortestPathLength	BetweennessCentrality	ClosenessCentrality	ClusteringCoefficient	Degree	Eccentricity	IsSingleNode	name	NeighborhoodConnectivity	NumberOfDirectedEdges	NumberOfUndirectedEdges	PartnerOfMultiEdgedNodePairs	Radiality	selected	SelfLoops	shared name	Stress	TopologicalCoefficient
81	1.325	0.251308	0.754717	0.336182	27	2	FALSE	ALB	10.7407	27	0	0	0.91875	FALSE	0	ALB	1028	0.274454
72	1.4	0.218301	0.714286	0.313846	26	3	FALSE	VEGFA	10.2308	26	0	0	0.9	FALSE	0	VEGFA	936	0.275468
80	1.5	0.139609	0.666667	0.371542	23	3	FALSE	FN1	11.087	23	0	0	0.875	FALSE	0	FN1	732	0.299647
78	1.525	0.0548035	0.655738	0.505263	20	3	FALSE	NOS3	12.95	20	0	0	0.86875	FALSE	0	NOS3	440	0.332051
109	1.575	0.0747029	0.634921	0.54902	18	3	FALSE	PTGS2	13.4444	18	0	0	0.85625	FALSE	0	PTGS2	396	0.352339
90	1.625	0.053863	0.615385	0.5	17	3	FALSE	ACE	13.5294	17	0	0	0.84375	FALSE	0	ACE	374	0.356037
91	1.625	0.036471	0.615385	0.558824	17	3	FALSE	REN	13.9412	17	0	0	0.84375	FALSE	0	REN	340	0.366873
125	1.675	0.0245071	0.597015	0.666667	16	3	FALSE	ICAM1	14.6875	16	0	0	0.83125	FALSE	0	ICAM1	208	0.396959
85	1.725	0.0107621	0.57971	0.75641	13	3	FALSE	SPP1	16.2308	13	0	0	0.81875	FALSE	0	SPP1	120	0.427126
130	1.775	0.0034417	0.56338	0.818182	12	3	FALSE	HMOX1	16.75	12	0	0	0.80625	FALSE	0	HMOX1	42	0.452703
141	1.75	0.0160226	0.571429	0.681818	12	3	FALSE	F3	16.25	12	0	0	0.8125	FALSE	0	F3	140	0.427632
73	1.85	0.0136422	0.540541	0.688889	10	3	FALSE	FLT1	16.2	10	0	0	0.7875	FALSE	0	FLT1	82	0.45
93	1.8	0.00611089	0.555556	0.8	10	3	FALSE	AGTR1	18	10	0	0	0.8	FALSE	0	AGTR1	72	0.473684
123	1.85	0.00061513	0.540541	0.911111	10	3	FALSE	IFNG	17.6	10	0	0	0.7875	FALSE	0	IFNG	8	0.488889
100	2.025	0.0241978	0.493827	0.583333	9	3	FALSE	NR3C2	12.4444	9	0	0	0.74375	FALSE	0	NR3C2	198	0.414815
103	1.875	0.00361231	0.533333	0.777778	9	3	FALSE	DPP4	18	9	0	0	0.78125	FALSE	0	DPP4	40	0.5
122	1.875	0.0008547	0.533333	0.888889	9	3	FALSE	CXCL10	17.1111	9	0	0	0.78125	FALSE	0	CXCL10	10	0.475309
101	1.9	0.0367726	0.526316	0.571429	8	3	FALSE	NR3C1	15.375	8	0	0	0.775	FALSE	0	NR3C1	278	0.427083
98	2.075	0.00329416	0.481928	0.666667	7	3	FALSE	ACE2	13.7143	7	0	0	0.73125	FALSE	0	ACE2	24	0.457143
95	2.1	0.0501166	0.47619	0.6	6	3	FALSE	PPARA	15.1667	6	0	0	0.725	FALSE	0	PPARA	304	0.517241
118	1.95	0.00268519	0.512821	0.733333	6	3	FALSE	CTSB	17.1667	6	0	0	0.7625	FALSE	0	CTSB	18	0.476852
75	2	0.00769513	0.5	0.7	5	3	FALSE	NRP1	17.6	5	0	0	0.75	FALSE	0	NRP1	46	0.502857
106	2.125	0.00621032	0.470588	0.5	5	3	FALSE	LYZ	11.4	5	0	0	0.71875	FALSE	0	LYZ	30	0.386207
107	2.125	0.00144587	0.470588	0.7	5	3	FALSE	PRTN3	13.2	5	0	0	0.71875	FALSE	0	PRTN3	10	0.44
115	2.075	0.00384005	0.481928	0.6	5	3	FALSE	GUSB	13.2	5	0	0	0.73125	FALSE	0	GUSB	24	0.4125
119	2	0.00408781	0.5	0.7	5	3	FALSE	CTSL	17	5	0	0	0.75	FALSE	0	CTSL	22	0.485714
159	2.025	0	0.493827	1	5	3	FALSE	SOD1	20.6	5	0	0	0.74375	FALSE	0	SOD1	0	0.605882
136	2.425	0.00018315	0.412371	0.833333	4	4	FALSE	HSD11B2	12.75	4	0	0	0.64375	FALSE	0	HSD11B2	2	0.607143
195	2.125	0.00116411	0.470588	0.666667	4	4	FALSE	ECE1	17.5	4	0	0	0.71875	FALSE	0	ECE1	14	0.546875
111	2.25	0.00224359	0.444444	0.333333	3	4	FALSE	HPSE	12	3	0	0	0.6875	FALSE	0	HPSE	12	0.416667
88	2.275	0	0.43956	1	2	4	FALSE	VHL	24.5	2	0	0	0.68125	FALSE	0	VHL	0	0.844828
113	2.45	0	0.408163	1	2	4	FALSE	LIMK1	14	2	0	0	0.6375	FALSE	0	LIMK1	0	0.608696
150	2.775	0	0.36036	1	2	4	FALSE	HSD11B1	8.5	2	0	0	0.55625	FALSE	0	HSD11B1	0	0.772727
154	2.35	0	0.425532	1	2	4	FALSE	RET	18	2	0	0	0.6625	FALSE	0	RET	0	0.692308
169	2.275	0	0.43956	1	2	4	FALSE	INSR	24.5	2	0	0	0.68125	FALSE	0	INSR	0	0.844828
246	2.45	0	0.408163	1	2	4	FALSE	ZAP70	19.5	2	0	0	0.6375	FALSE	0	ZAP70	0	0.847826
273	2.25	0.05	0.444444	0	2	3	FALSE	TRPC6	14	2	0	0	0.6875	FALSE	0	TRPC6	106	0.5
96	3.075	0	0.325203	0	1	4	FALSE	EHHADH	6	1	0	0	0.48125	FALSE	0	EHHADH	0	0
192	2.375	0	0.421053	0	1	4	FALSE	NR4A1	26	1	0	0	0.65625	FALSE	0	NR4A1	0	0
239	2.55	0	0.392157	0	1	4	FALSE	ALOX5AP	18	1	0	0	0.6125	FALSE	0	ALOX5AP	0	0
277	3.225	0	0.310078	0	1	4	FALSE	ADCK4	2	1	0	0	0.44375	FALSE	0	ADCK4	0	0
